# Supplementary material for: Analysis of microRNA expression profiles in exosomes derived from acute myeloid leukemia by p62 knockdown and effect on angiogenesis
Source: PeerJ journal article supplement (doi:10.7717/peerj.13498), 2022-07-22
Supplement: 3.PCR_and_CCK8.zip [file 12h-450.xls]

## Sheet: Plate1 - Sheet1
										u937	p62	con
		1	2	3	4	5	6	7	8	9	10	11	12
	A	0.033	0.033	0.032	0.032	0.033	0.032	0.032	0.033	0.229	0.259	0.26	0.036	450
	B	0.035	0.067	0.086	0.077	0.079	0.086	0.083	0.085	0.432	0.396	0.373	0.039	450
	C	0.033	0.077	0.081	0.081	0.082	0.086	0.084	0.084	0.46	0.401	0.437	0.042	450
	D	0.034	0.081	0.088	0.086	0.079	0.097	0.089	0.079	0.429	0.42	0.387	0.037	450
	E	0.035	0.082	0.081	0.089	0.088	0.093	0.096	0.086	0.559	0.563	0.492	0.041	450
	F	0.034	0.066	0.089	0.079	0.085	0.087	0.093	0.085	0.57	0.546	0.45	0.037	450
	G	0.035	0.071	0.088	0.099	0.082	0.082	0.091	0.084	0.573	0.524	0.456	0.037	450
	H	0.033	0.034	0.033	0.033	0.035	0.033	0.033	0.033	0.033	0.033	0.034	0.034	450
