# Supplementary material for: Analysis of microRNA expression profiles in exosomes derived from acute myeloid leukemia by p62 knockdown and effect on angiogenesis
Source: PeerJ journal article supplement (doi:10.7717/peerj.13498), 2022-07-22
Supplement: 3.PCR_and_CCK8.zip [file 24h-450.xls]

## Sheet: Plate 1 - Sheet1
		1	2	3	4	5	6	7	8	9	10	11	12
	A	0.033	0.032	0.032	0.032	0.033	0.032	0.032	0.033	0.249	0.314	0.314	0.043	450
	B	0.035	0.237	0.09	0.082	0.084	0.531	0.44	0.423	0.642	0.636	0.564	0.058	450
	C	0.033	0.258	0.085	0.087	0.088	0.539	0.438	0.429	0.681	0.645	0.629	0.082	450
	D	0.035	0.268	0.09	0.088	0.083	0.634	0.491	0.413	0.656	0.648	0.569	0.057	450
	E	0.035	0.084	0.086	0.097	0.093	0.715	0.634	0.536	0.929	1.058	0.776	0.076	450
	F	0.034	0.068	0.096	0.084	0.091	0.687	0.66	0.529	0.99	1.019	0.749	0.071	450
	G	0.035	0.074	0.094	0.094	0.088	0.657	0.609	0.521	0.932	0.979	0.737	0.06	450
	H	0.033	0.034	0.033	0.033	0.035	0.034	0.035	0.035	0.036	0.036	0.037	0.039	450
