# Supplementary material for: Analysis of microRNA expression profiles in exosomes derived from acute myeloid leukemia by p62 knockdown and effect on angiogenesis
Source: PeerJ journal article supplement (doi:10.7717/peerj.13498), 2022-07-22
Supplement: 3.PCR_and_CCK8.zip [file 48h-450.xls]

## Sheet: Plate1 - Sheet1
		1	2	3	4	5	6	7	8	9	10	11	12
	A	0.033	0.034	0.033	0.033	0.033	0.033	0.033	0.034	0.292	0.373	0.372	0.041	450
	B	0.037	0.312	0.821	0.55	0.525	1.009	0.911	0.761	0.82	0.89	0.718	0.055	450
	C	0.035	0.339	0.824	0.601	0.549	1.04	0.921	0.762	0.86	0.892	0.723	0.074	450
	D	0.037	0.356	0.827	0.842	0.539	1.084	0.975	0.753	0.853	0.93	0.715	0.06	450
	E	0.04	0.256	0.921	0.127	0.739	1.091	1.118	1.119	1.09	1.126	1.094	0.073	450
	F	0.037	0.221	0.928	0.754	0.73	1.077	1.147	1.093	1.108	1.106	1.073	0.063	450
	G	0.036	0.236	0.936	0.819	0.69	1.022	1.089	1.098	1.08	1.096	1.053	0.052	450
	H	0.034	0.033	0.034	0.035	0.036	0.036	0.035	0.035	0.036	0.038	0.038	0.039	450
