# Supplementary material for: Analysis of microRNA expression profiles in exosomes derived from acute myeloid leukemia by p62 knockdown and effect on angiogenesis
Source: PeerJ journal article supplement (doi:10.7717/peerj.13498), 2022-07-22
Supplement: 4.flow_cytometry.zip [file 1.pdf › 4.flow cytometry/1.pdf]

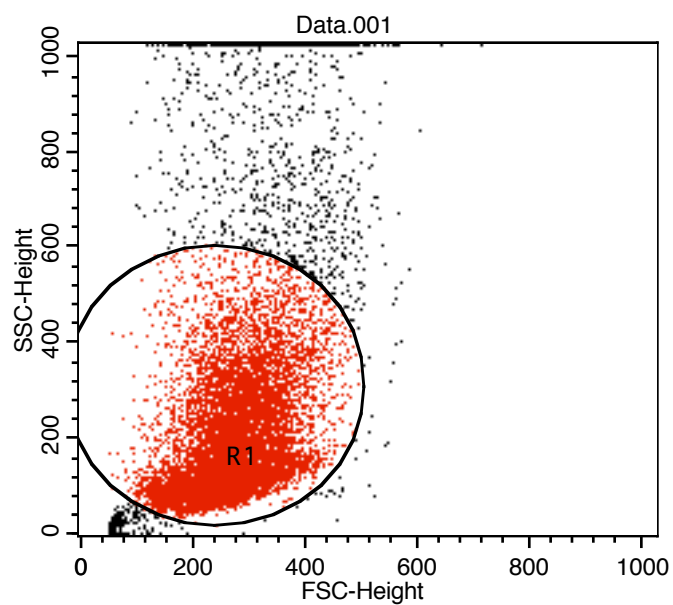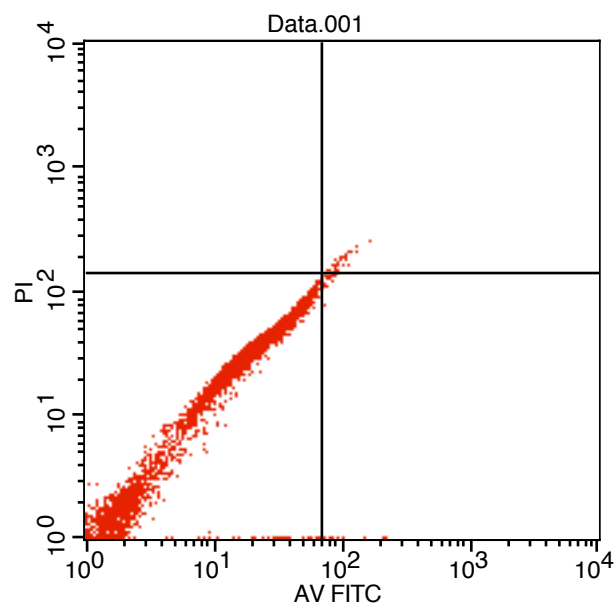

#### Quadrant Statistics

File: Data.001 Gate: G1  
 Gated Events: 10000 Total Events: 11300  
 X Parameter: AV FITC (Log) Y Parameter: PI (Log)

| Quad | Events | % Gated | % Total | X Mean | Y Mean |
|------|--------|---------|---------|--------|--------|
| UL   | 0      | 0.00    | 0.00    | ***    | ***    |
| UR   | 33     | 0.33    | 0.29    | 98.37  | 169.35 |
| LL   | 9930   | 99.30   | 87.88   | 19.83  | 31.44  |
| LR   | 37     | 0.37    | 0.33    | 87.92  | 91.51  |
