# Supplementary material for: Analysis of microRNA expression profiles in exosomes derived from acute myeloid leukemia by p62 knockdown and effect on angiogenesis
Source: PeerJ journal article supplement (doi:10.7717/peerj.13498), 2022-07-22
Supplement: 4.flow_cytometry.zip [file 1.pdf › 4.flow cytometry/LC1126/1.pdf]

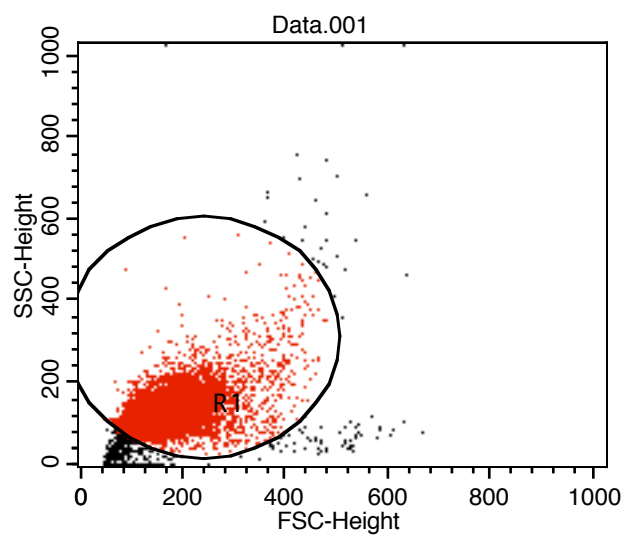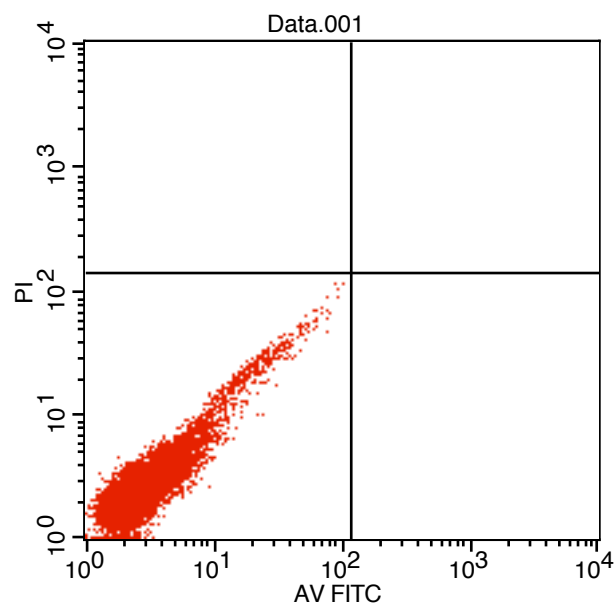

#### Quadrant Statistics

File: Data.001

Gate: G1

Gated Events: 10000

Total Events: 10471

X Parameter: AV FITC (Log)

Y Parameter: PI (Log)

| Quad | Events | % Gated | % Total | X Mean | Y Mean |
|------|--------|---------|---------|--------|--------|
| UL   | 0      | 0.00    | 0.00    | ***    | ***    |
| UR   | 0      | 0.00    | 0.00    | ***    | ***    |
| LL   | 10000  | 100.00  | 95.50   | 4.01   | 3.75   |
| LR   | 0      | 0.00    | 0.00    | ***    | ***    |
