# Supplementary material for: Analysis of microRNA expression profiles in exosomes derived from acute myeloid leukemia by p62 knockdown and effect on angiogenesis
Source: PeerJ journal article supplement (doi:10.7717/peerj.13498), 2022-07-22
Supplement: 4.flow_cytometry.zip [file 1.pdf › 4.flow cytometry/LC1130/1.pdf]

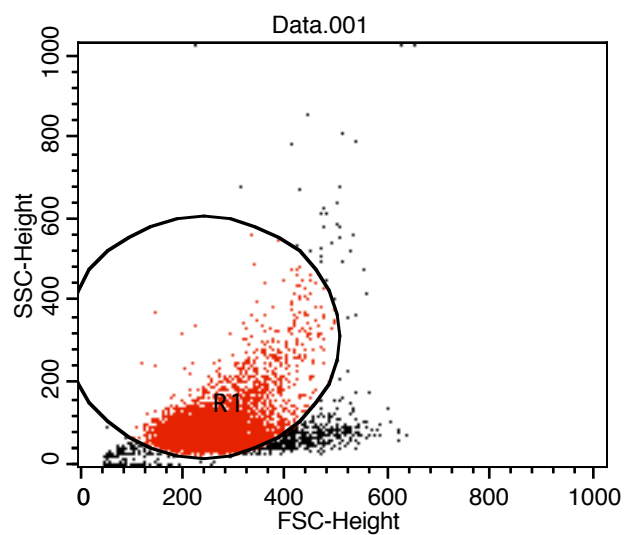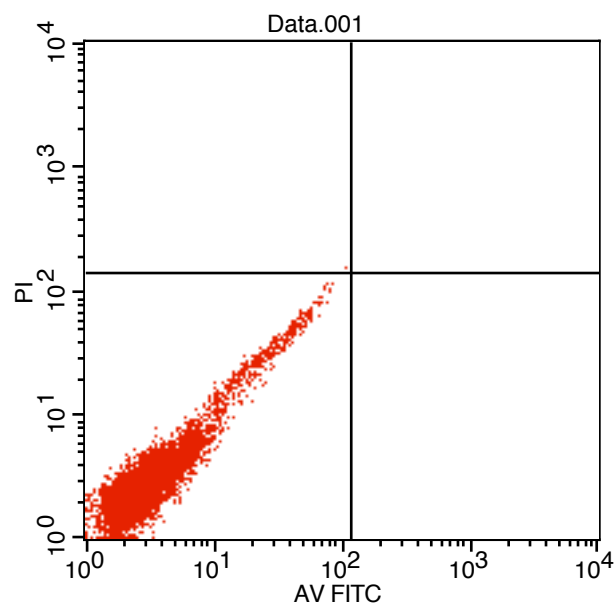

#### Quadrant Statistics

File: Data.001 Gate: G1  
 Gated Events: 10000 Total Events: 10584  
 X Parameter: AV FITC (Log) Y Parameter: PI (Log)

| Quad | Events | % Gated | % Total | X Mean | Y Mean |
|------|--------|---------|---------|--------|--------|
| UL   | 1      | 0.01    | 0.01    | 106.50 | 148.55 |
| UR   | 0      | 0.00    | 0.00    | ***    | ***    |
| LL   | 9999   | 99.99   | 94.47   | 4.22   | 4.29   |
| LR   | 0      | 0.00    | 0.00    | ***    | ***    |
