# Supplementary material for: Analysis of microRNA expression profiles in exosomes derived from acute myeloid leukemia by p62 knockdown and effect on angiogenesis
Source: PeerJ journal article supplement (doi:10.7717/peerj.13498), 2022-07-22
Supplement: 4.flow_cytometry.zip [file 2.pdf › 4.flow cytometry/LC1130/2.pdf]

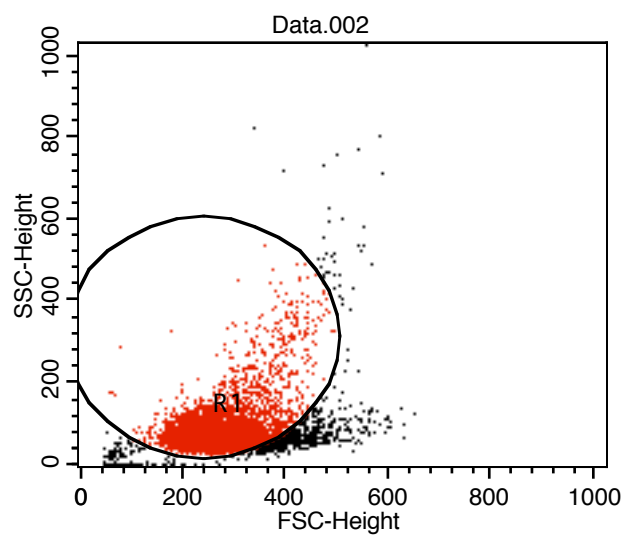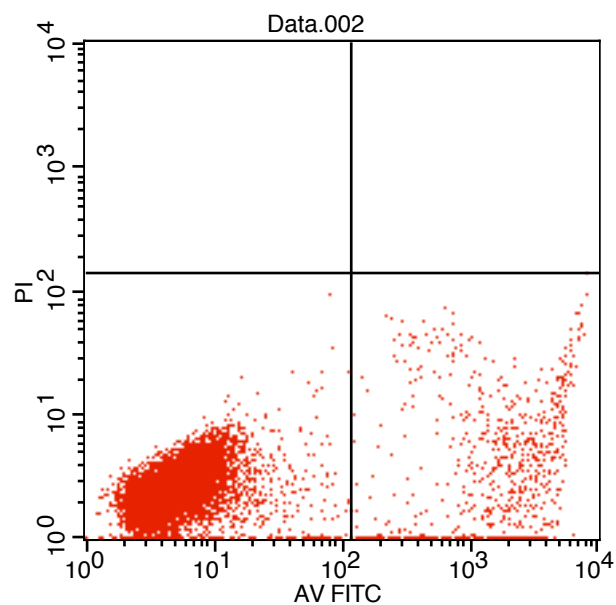

# Quadrant Statistics

File: Data.002 Gate: G1  
 Gated Events: 10000 Total Events: 10679  
 X Parameter: AV FITC (Log) Y Parameter: PI (Log)

| Quad | Events | % Gated | % Total | X Mean  | Y Mean |
|------|--------|---------|---------|---------|--------|
| UL   | 0      | 0.00    | 0.00    | ***     | ***    |
| UR   | 1      | 0.01    | 0.01    | 8131.23 | 138.24 |
| LL   | 9266   | 92.66   | 86.77   | 6.42    | 2.75   |
| LR   | 733    | 7.33    | 6.86    | 2252.62 | 8.18   |
