# Supplementary material for: Analysis of microRNA expression profiles in exosomes derived from acute myeloid leukemia by p62 knockdown and effect on angiogenesis
Source: PeerJ journal article supplement (doi:10.7717/peerj.13498), 2022-07-22
Supplement: 4.flow_cytometry.zip [file 2ta.pdf › 4.flow cytometry/LC1126/2ta.pdf]

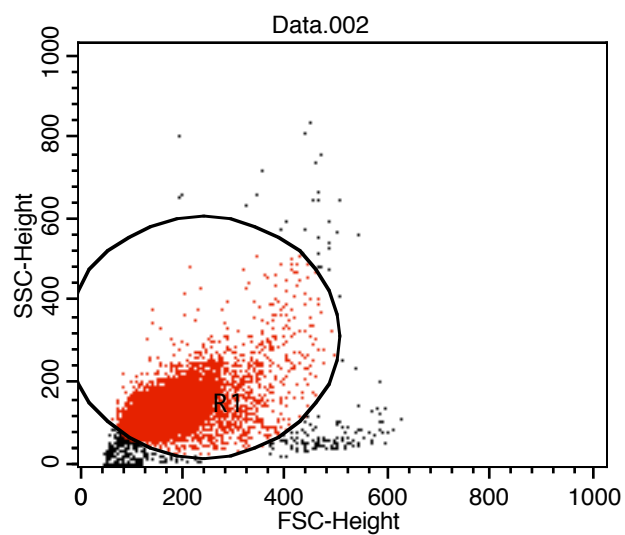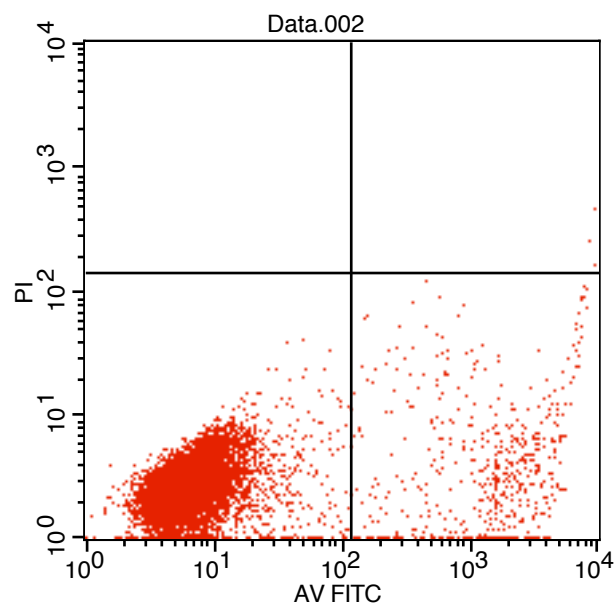

#### Quadrant Statistics

File: Data.002 Gate: G1  
 Gated Events: 10000 Total Events: 10432  
 X Parameter: AV FITC (Log) Y Parameter: PI (Log)

| Quad | Events | % Gated | % Total | X Mean  | Y Mean |
|------|--------|---------|---------|---------|--------|
| UL   | 0      | 0.00    | 0.00    | ***     | ***    |
| UR   | 3      | 0.03    | 0.03    | 9286.12 | 285.59 |
| LL   | 9432   | 94.32   | 90.41   | 7.91    | 2.79   |
| LR   | 565    | 5.65    | 5.42    | 1958.60 | 8.04   |
