# Supplementary material for: Analysis of microRNA expression profiles in exosomes derived from acute myeloid leukemia by p62 knockdown and effect on angiogenesis
Source: PeerJ journal article supplement (doi:10.7717/peerj.13498), 2022-07-22
Supplement: 4.flow_cytometry.zip [file 2transfection pi.pdf › 4.flow cytometry/2transfection pi.pdf]

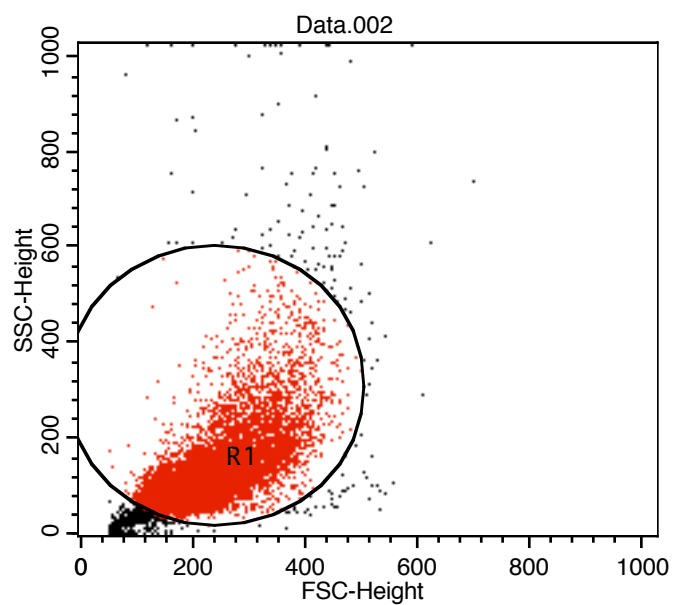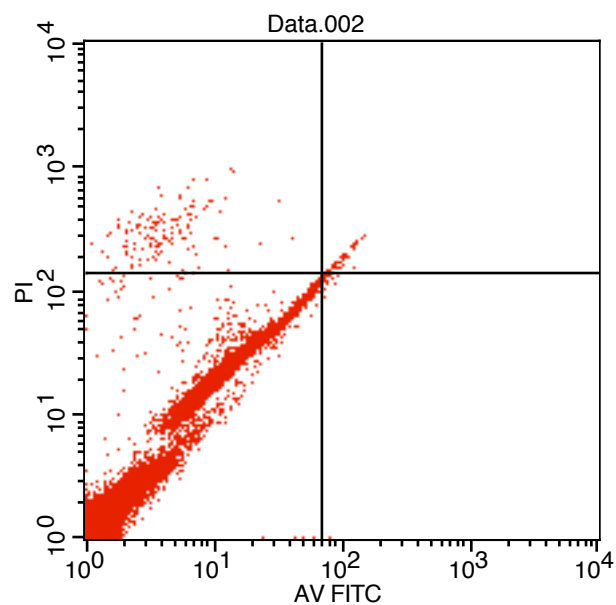

#### Quadrant Statistics

File: Data.002

Gate: G1

Gated Events: 10000

Total Events: 10593

X Parameter: AV FITC (Log)

Y Parameter: PI (Log)

| Quad | Events | % Gated | % Total | X Mean | Y Mean |
|------|--------|---------|---------|--------|--------|
| UL   | 129    | 1.29    | 1.22    | 5.19   | 326.07 |
| UR   | 45     | 0.45    | 0.42    | 100.21 | 179.55 |
| LL   | 9799   | 97.99   | 92.50   | 9.98   | 17.12  |
| LR   | 27     | 0.27    | 0.25    | 76.93  | 113.90 |
