# Supplementary material for: Analysis of microRNA expression profiles in exosomes derived from acute myeloid leukemia by p62 knockdown and effect on angiogenesis
Source: PeerJ journal article supplement (doi:10.7717/peerj.13498), 2022-07-22
Supplement: 4.flow_cytometry.zip [file 3.pdf › 4.flow cytometry/LC1130/3.pdf]

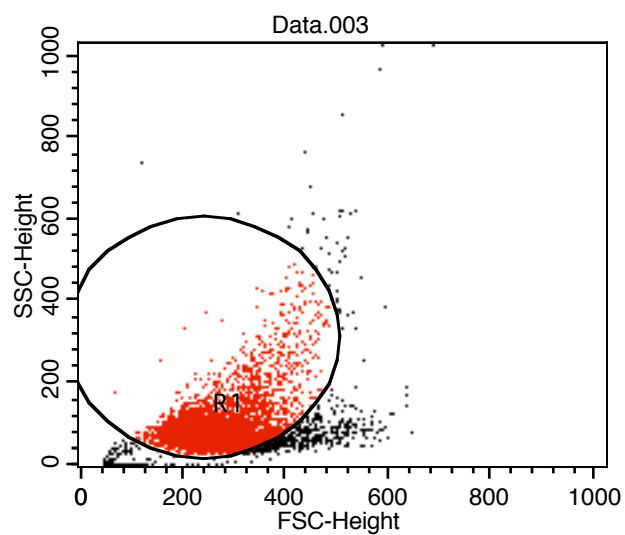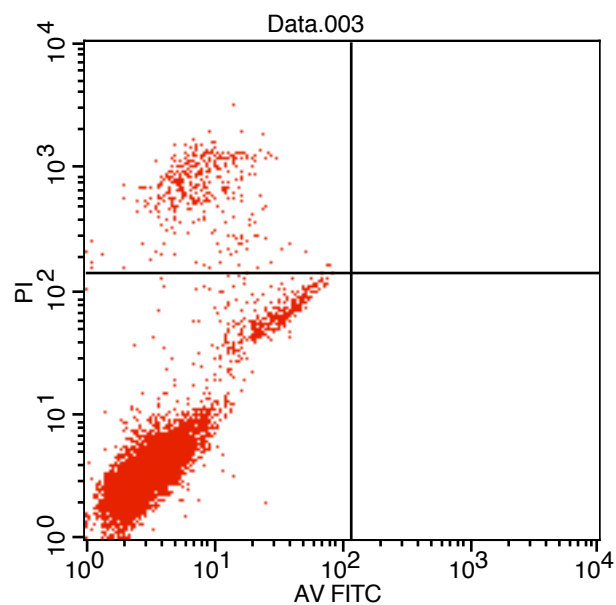

#### Quadrant Statistics

File: Data.003 Gate: G1  
 Gated Events: 10000 Total Events: 10613  
 X Parameter: AV FITC (Log) Y Parameter: PI (Log)

| Quad | Events | % Gated | % Total | X Mean | Y Mean |
|------|--------|---------|---------|--------|--------|
| UL   | 361    | 3.61    | 3.40    | 9.54   | 773.56 |
| UR   | 0      | 0.00    | 0.00    | ***    | ***    |
| LL   | 9639   | 96.39   | 90.82   | 4.17   | 5.96   |
| LR   | 0      | 0.00    | 0.00    | ***    | ***    |
