# Supplementary material for: Analysis of microRNA expression profiles in exosomes derived from acute myeloid leukemia by p62 knockdown and effect on angiogenesis
Source: PeerJ journal article supplement (doi:10.7717/peerj.13498), 2022-07-22
Supplement: 4.flow_cytometry.zip [file 3no transfection.pdf › 4.flow cytometry/3no transfection.pdf]

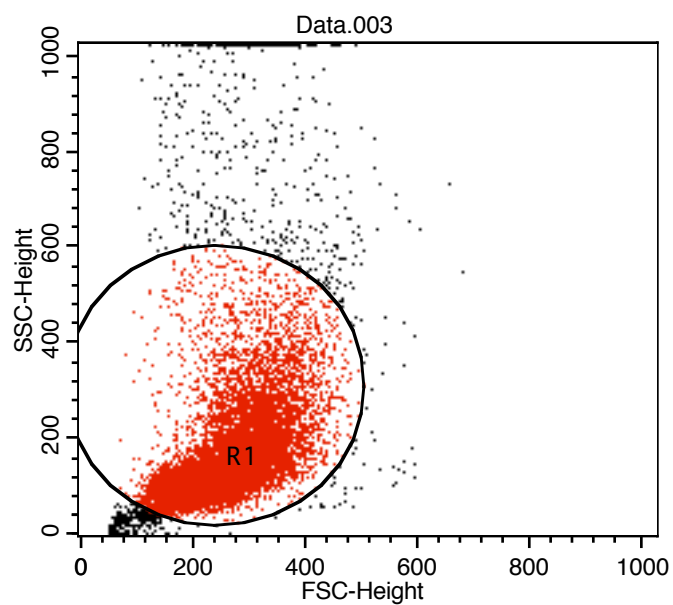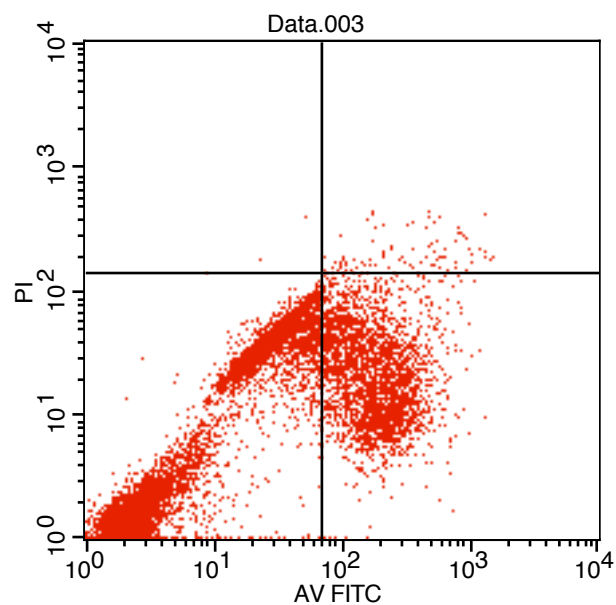

#### Quadrant Statistics

File: Data.003

Gate: G1

Gated Events: 10000

Total Events: 10873

X Parameter: AV FITC (Log)

Y Parameter: PI (Log)

| Quad | Events | % Gated | % Total | X Mean | Y Mean |
|------|--------|---------|---------|--------|--------|
| UL   | 3      | 0.03    | 0.03    | 27.82  | 233.09 |
| UR   | 87     | 0.87    | 0.80    | 435.70 | 213.63 |
| LL   | 7170   | 71.70   | 65.94   | 17.69  | 20.75  |
| LR   | 2740   | 27.40   | 25.20   | 205.48 | 28.17  |
