# Supplementary material for: Analysis of microRNA expression profiles in exosomes derived from acute myeloid leukemia by p62 knockdown and effect on angiogenesis
Source: PeerJ journal article supplement (doi:10.7717/peerj.13498), 2022-07-22
Supplement: 4.flow_cytometry.zip [file 3pi.pdf › 4.flow cytometry/LC1126/3pi.pdf]

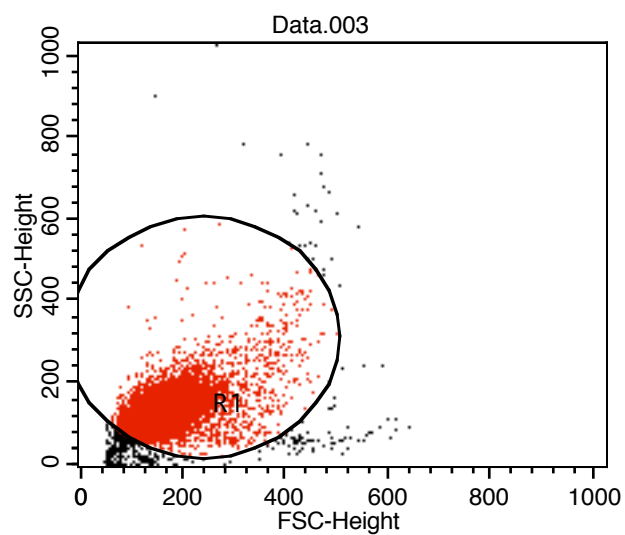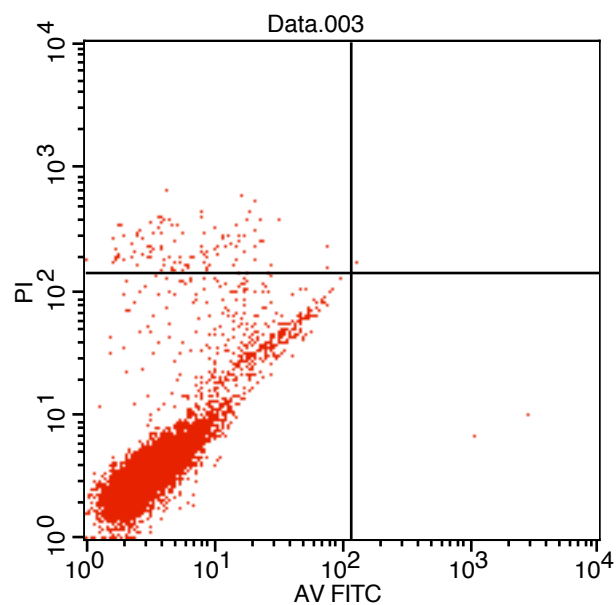

#### Quadrant Statistics

File: Data.003 Gate: G1  
 Gated Events: 10000 Total Events: 10368  
 X Parameter: AV FITC (Log) Y Parameter: PI (Log)

| Quad | Events | % Gated | % Total | X Mean  | Y Mean |
|------|--------|---------|---------|---------|--------|
| UL   | 108    | 1.08    | 1.04    | 9.42    | 244.39 |
| UR   | 1      | 0.01    | 0.01    | 127.49  | 164.00 |
| LL   | 9889   | 98.89   | 95.38   | 4.21    | 5.40   |
| LR   | 2      | 0.02    | 0.02    | 1958.66 | 8.35   |
