# Supplementary material for: Analysis of microRNA expression profiles in exosomes derived from acute myeloid leukemia by p62 knockdown and effect on angiogenesis
Source: PeerJ journal article supplement (doi:10.7717/peerj.13498), 2022-07-22
Supplement: 4.flow_cytometry.zip [file 4.pdf › 4.flow cytometry/LC1126/4.pdf]

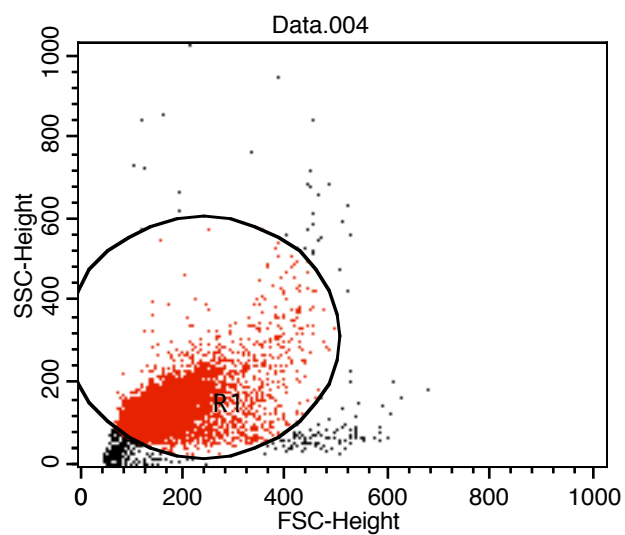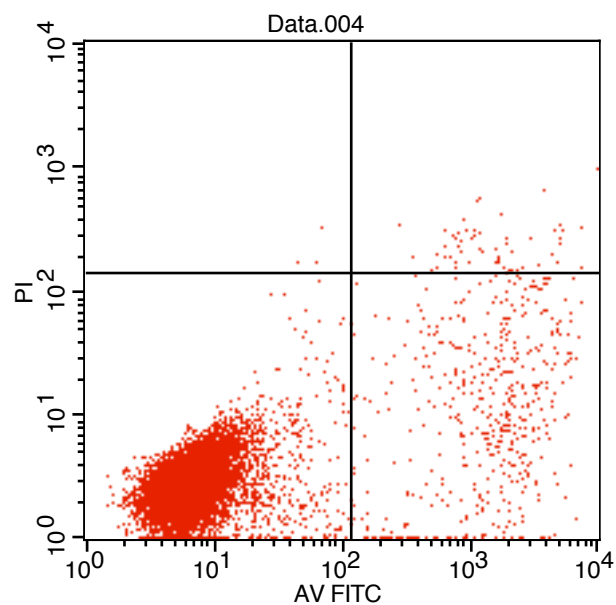

#### Quadrant Statistics

File: Data.004 Gate: G1  
 Gated Events: 10000 Total Events: 10363  
 X Parameter: AV FITC (Log) Y Parameter: PI (Log)

| Quad | Events | % Gated | % Total | X Mean  | Y Mean |
|------|--------|---------|---------|---------|--------|
| UL   | 3      | 0.03    | 0.03    | 59.81   | 216.19 |
| UR   | 57     | 0.57    | 0.55    | 2157.38 | 255.85 |
| LL   | 9459   | 94.59   | 91.28   | 8.41    | 3.10   |
| LR   | 481    | 4.81    | 4.64    | 1864.87 | 23.21  |
