# Supplementary material for: Analysis of microRNA expression profiles in exosomes derived from acute myeloid leukemia by p62 knockdown and effect on angiogenesis
Source: PeerJ journal article supplement (doi:10.7717/peerj.13498), 2022-07-22
Supplement: 4.flow_cytometry.zip [file 4.pdf › 4.flow cytometry/LC1130/4.pdf]

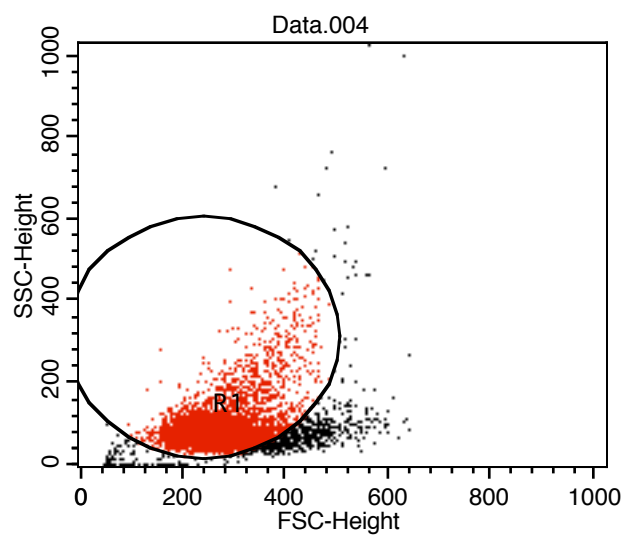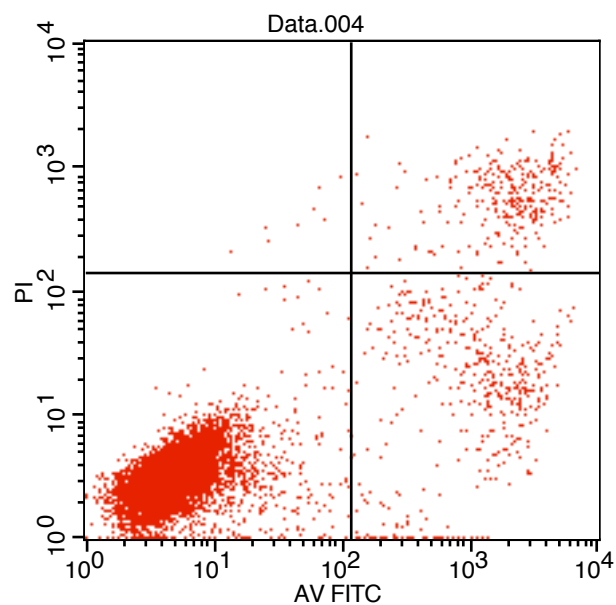

# Quadrant Statistics

File: Data.004 Gate: G1  
 Gated Events: 10000 Total Events: 10698  
 X Parameter: AV FITC (Log) Y Parameter: PI (Log)

| Quad | Events | % Gated | % Total | X Mean  | Y Mean |
|------|--------|---------|---------|---------|--------|
| UL   | 8      | 0.08    | 0.07    | 50.79   | 427.06 |
| UR   | 296    | 2.96    | 2.77    | 2466.64 | 653.65 |
| LL   | 9240   | 92.40   | 86.37   | 5.95    | 3.48   |
| LR   | 456    | 4.56    | 4.26    | 1457.87 | 27.74  |
