# Supplementary material for: Analysis of microRNA expression profiles in exosomes derived from acute myeloid leukemia by p62 knockdown and effect on angiogenesis
Source: PeerJ journal article supplement (doi:10.7717/peerj.13498), 2022-07-22
Supplement: 4.flow_cytometry.zip [file 4con.pdf › 4.flow cytometry/4con.pdf]

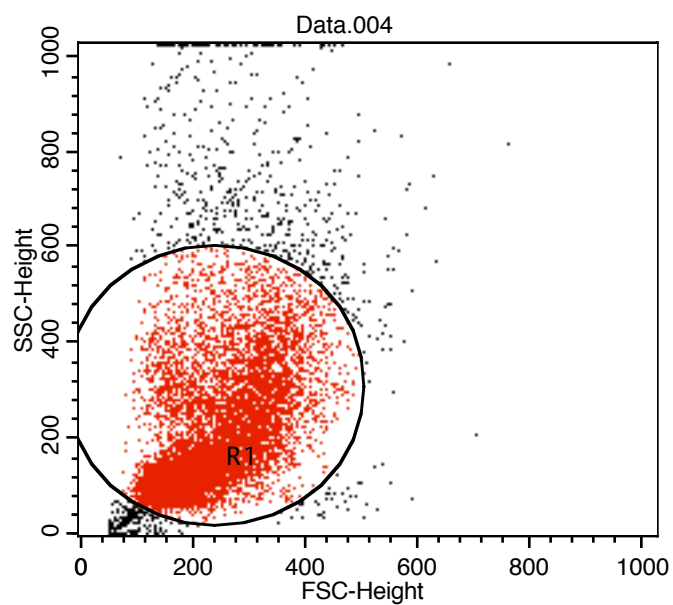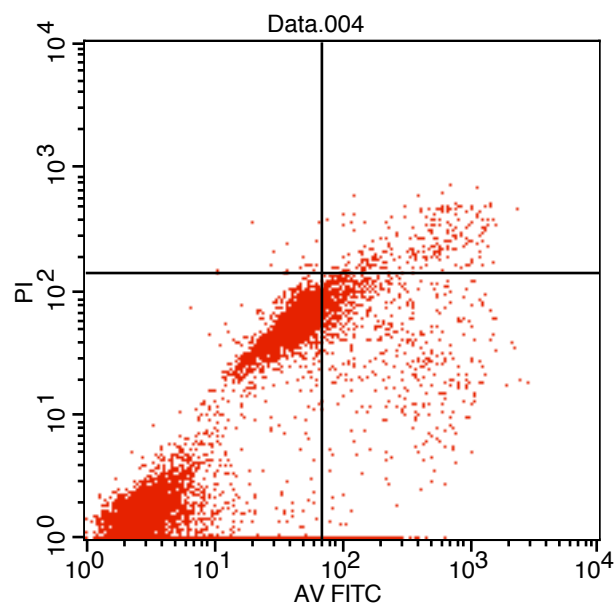

#### Quadrant Statistics

File: Data.004 Gate: G1  
 Gated Events: 10000 Total Events: 10795  
 X Parameter: AV FITC (Log) Y Parameter: PI (Log)

| Quad | Events | % Gated | % Total | X Mean | Y Mean |
|------|--------|---------|---------|--------|--------|
| UL   | 15     | 0.15    | 0.14    | 45.06  | 197.61 |
| UR   | 231    | 2.31    | 2.14    | 524.46 | 264.96 |
| LL   | 8633   | 86.33   | 79.97   | 21.48  | 23.41  |
| LR   | 1121   | 11.21   | 10.38   | 220.82 | 46.97  |
