# Supplementary material for: Analysis of microRNA expression profiles in exosomes derived from acute myeloid leukemia by p62 knockdown and effect on angiogenesis
Source: PeerJ journal article supplement (doi:10.7717/peerj.13498), 2022-07-22
Supplement: 4.flow_cytometry.zip [file 5.pdf › 4.flow cytometry/LC1126/5.pdf]

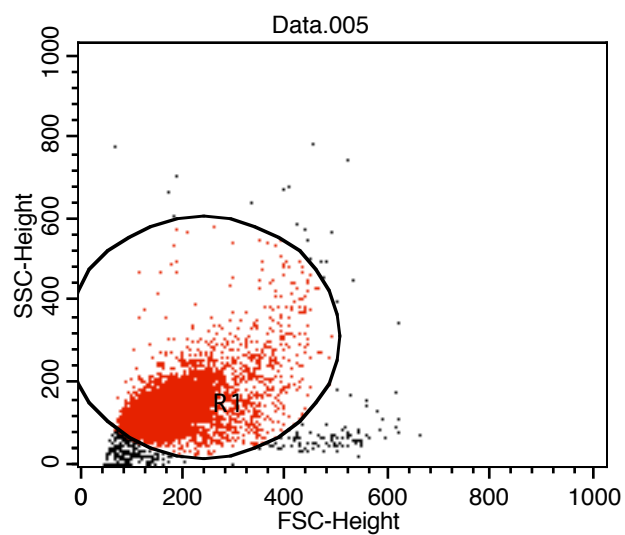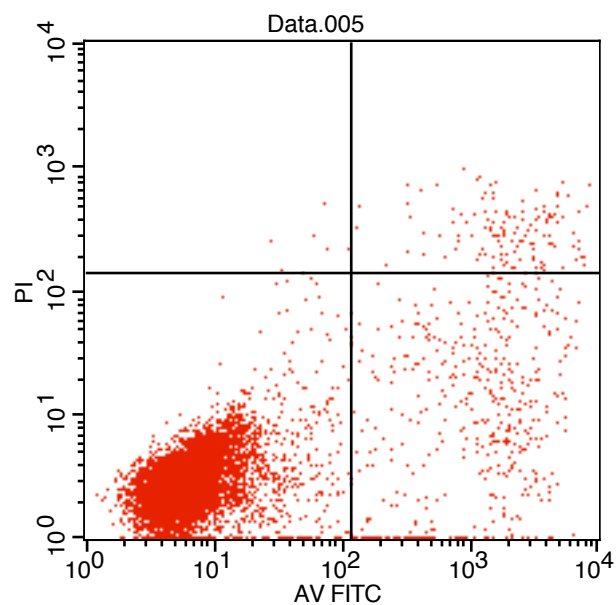

#### Quadrant Statistics

File: Data.005 Gate: G1  
 Gated Events: 10000 Total Events: 10352  
 X Parameter: AV FITC (Log) Y Parameter: PI (Log)

| Quad | Events | % Gated | % Total | X Mean  | Y Mean |
|------|--------|---------|---------|---------|--------|
| UL   | 7      | 0.07    | 0.07    | 61.51   | 248.62 |
| UR   | 132    | 1.32    | 1.28    | 2685.54 | 344.70 |
| LL   | 9418   | 94.18   | 90.98   | 8.02    | 3.34   |
| LR   | 443    | 4.43    | 4.28    | 1629.01 | 21.87  |
