# Supplementary material for: Analysis of microRNA expression profiles in exosomes derived from acute myeloid leukemia by p62 knockdown and effect on angiogenesis
Source: PeerJ journal article supplement (doi:10.7717/peerj.13498), 2022-07-22
Supplement: 4.flow_cytometry.zip [file 5.pdf › 4.flow cytometry/LC1130/5.pdf]

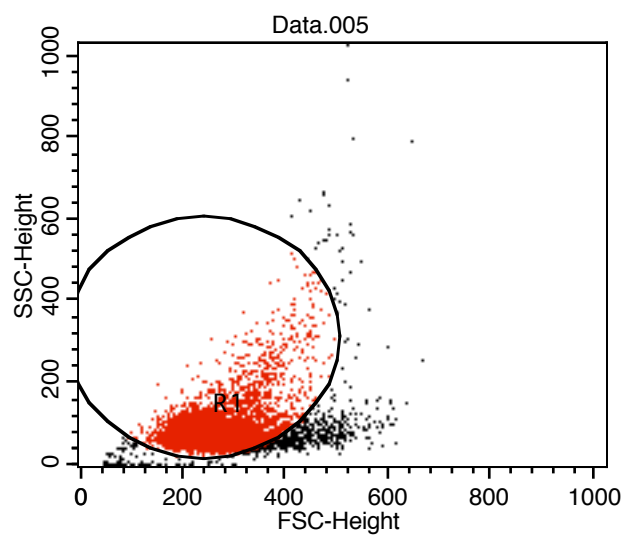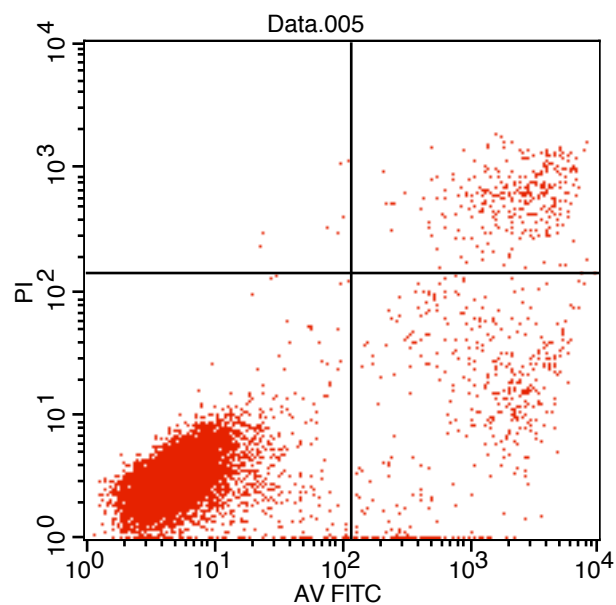

# Quadrant Statistics

File: Data.005 Gate: G1  
 Gated Events: 10000 Total Events: 10638  
 X Parameter: AV FITC (Log) Y Parameter: PI (Log)

| Quad | Events | % Gated | % Total | X Mean  | Y Mean |
|------|--------|---------|---------|---------|--------|
| UL   | 7      | 0.07    | 0.07    | 74.86   | 524.48 |
| UR   | 318    | 3.18    | 2.99    | 2900.77 | 643.72 |
| LL   | 9239   | 92.39   | 86.85   | 6.59    | 3.46   |
| LR   | 436    | 4.36    | 4.10    | 1768.57 | 25.11  |
