# Supplementary material for: Analysis of microRNA expression profiles in exosomes derived from acute myeloid leukemia by p62 knockdown and effect on angiogenesis
Source: PeerJ journal article supplement (doi:10.7717/peerj.13498), 2022-07-22
Supplement: 4.flow_cytometry.zip [file 5con.pdf › 4.flow cytometry/5con.pdf]

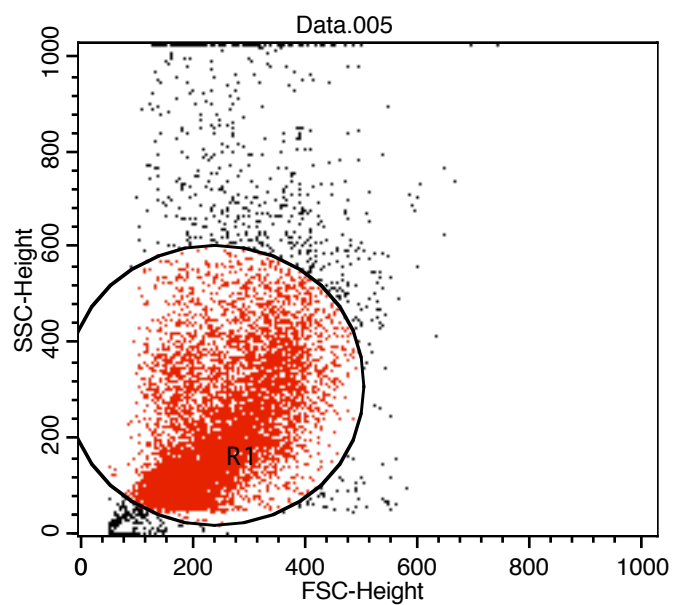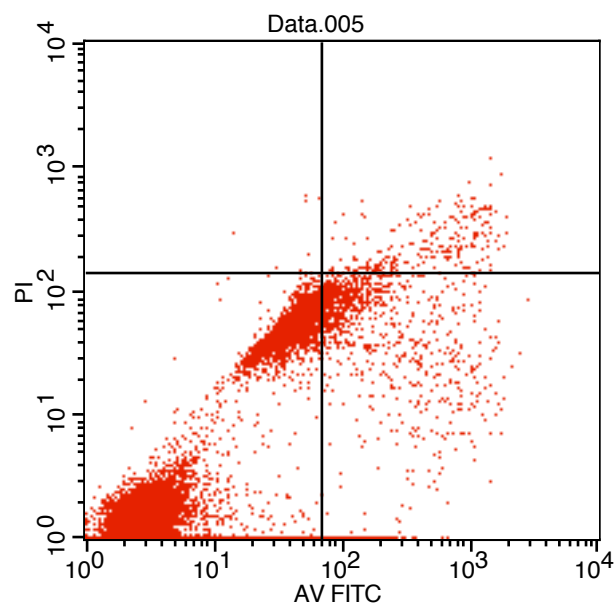

#### Quadrant Statistics

File: Data.005

Gate: G1

Gated Events: 10000

Total Events: 10800

X Parameter: AV FITC (Log)

Y Parameter: PI (Log)

| Quad | Events | % Gated | % Total | X Mean | Y Mean |
|------|--------|---------|---------|--------|--------|
| UL   | 8      | 0.08    | 0.07    | 46.00  | 323.74 |
| UR   | 237    | 2.37    | 2.19    | 640.22 | 268.83 |
| LL   | 8373   | 83.73   | 77.53   | 22.06  | 22.74  |
| LR   | 1382   | 13.82   | 12.80   | 236.05 | 49.02  |
