# Supplementary material for: Analysis of microRNA expression profiles in exosomes derived from acute myeloid leukemia by p62 knockdown and effect on angiogenesis
Source: PeerJ journal article supplement (doi:10.7717/peerj.13498), 2022-07-22
Supplement: 4.flow_cytometry.zip [file 6,p62.pdf › 4.flow cytometry/6,p62.pdf]

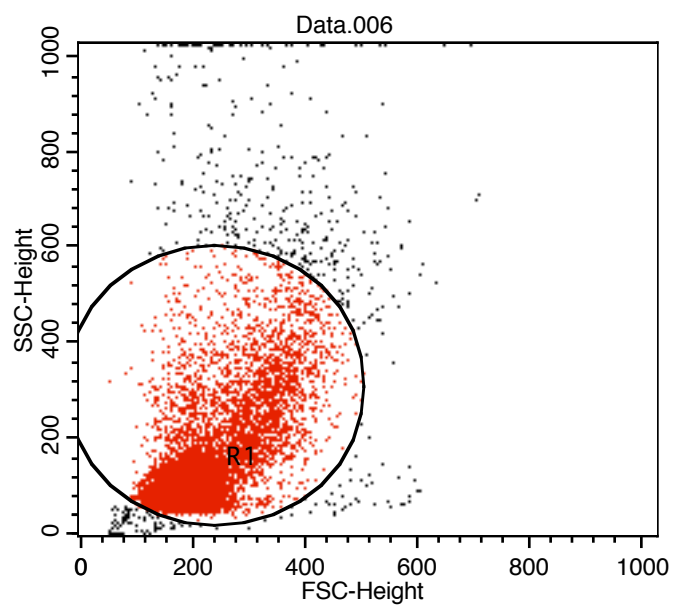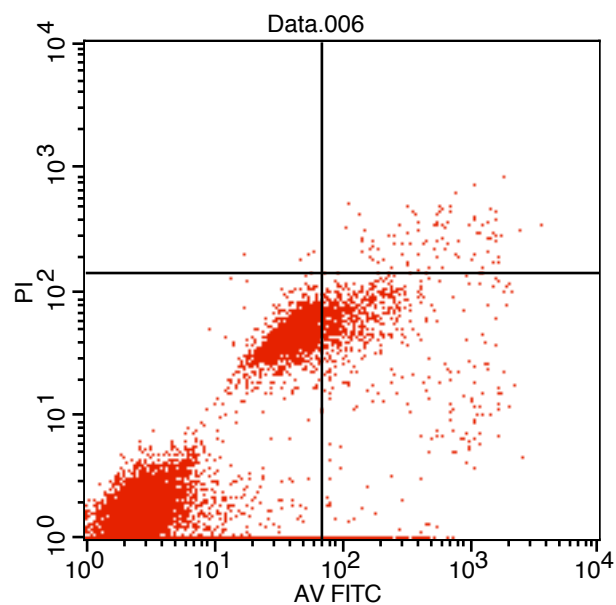

#### Quadrant Statistics

File: Data.006

Gate: G1

Gated Events: 10000

Total Events: 10487

X Parameter: AV FITC (Log)

Y Parameter: PI (Log)

| Quad | Events | % Gated | % Total | X Mean | Y Mean |
|------|--------|---------|---------|--------|--------|
| UL   | 4      | 0.04    | 0.04    | 44.88  | 192.16 |
| UR   | 97     | 0.97    | 0.92    | 724.00 | 285.98 |
| LL   | 8941   | 89.41   | 85.26   | 14.58  | 12.02  |
| LR   | 958    | 9.58    | 9.14    | 229.25 | 45.03  |
