# Supplementary material for: Analysis of microRNA expression profiles in exosomes derived from acute myeloid leukemia by p62 knockdown and effect on angiogenesis
Source: PeerJ journal article supplement (doi:10.7717/peerj.13498), 2022-07-22
Supplement: 4.flow_cytometry.zip [file 6.pdf › 4.flow cytometry/LC1126/6.pdf]

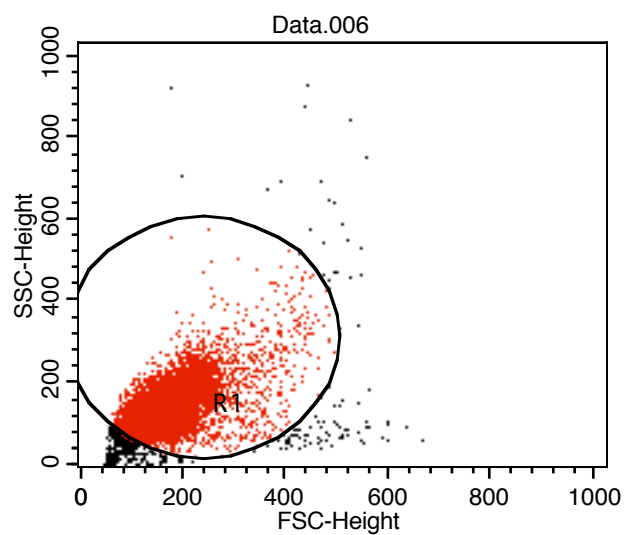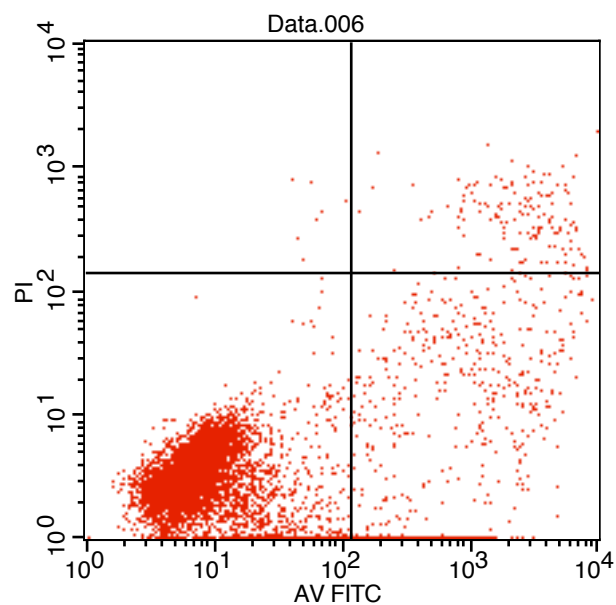

# Quadrant Statistics

File: Data.006 Gate: G1  
 Gated Events: 10000 Total Events: 10456  
 X Parameter: AV FITC (Log) Y Parameter: PI (Log)

| Quad | Events | % Gated | % Total | X Mean  | Y Mean |
|------|--------|---------|---------|---------|--------|
| UL   | 7      | 0.07    | 0.07    | 61.86   | 473.99 |
| UR   | 147    | 1.47    | 1.41    | 3070.59 | 469.24 |
| LL   | 7527   | 75.27   | 71.99   | 21.93   | 3.06   |
| LR   | 2319   | 23.19   | 22.18   | 530.86  | 5.99   |
