# Supplementary material for: Analysis of microRNA expression profiles in exosomes derived from acute myeloid leukemia by p62 knockdown and effect on angiogenesis
Source: PeerJ journal article supplement (doi:10.7717/peerj.13498), 2022-07-22
Supplement: 4.flow_cytometry.zip [file 6.pdf › 4.flow cytometry/LC1130/6.pdf]

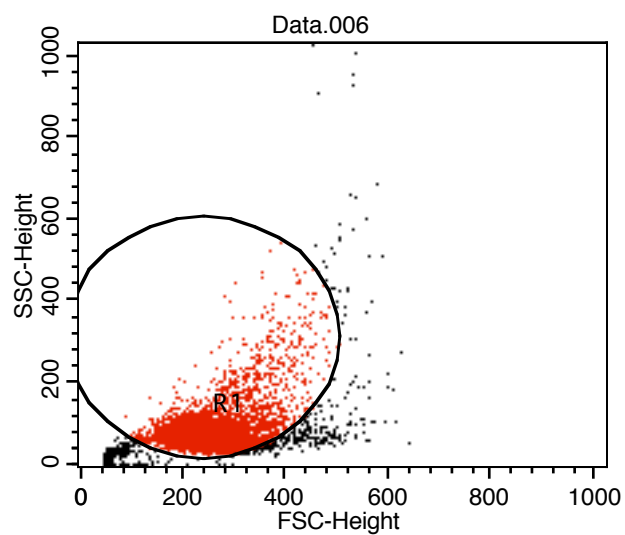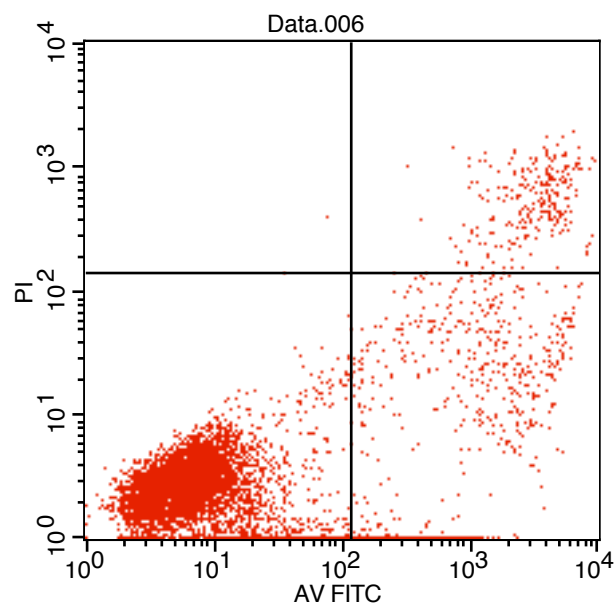

#### Quadrant Statistics

File: Data.006 Gate: G1  
 Gated Events: 10000 Total Events: 10529  
 X Parameter: AV FITC (Log) Y Parameter: PI (Log)

| Quad | Events | % Gated | % Total | X Mean  | Y Mean |
|------|--------|---------|---------|---------|--------|
| UL   | 1      | 0.01    | 0.01    | 76.35   | 381.97 |
| UR   | 265    | 2.65    | 2.52    | 3578.65 | 616.27 |
| LL   | 7415   | 74.15   | 70.42   | 20.34   | 2.60   |
| LR   | 2319   | 23.19   | 22.02   | 581.61  | 7.52   |
