# Supplementary material for: Analysis of microRNA expression profiles in exosomes derived from acute myeloid leukemia by p62 knockdown and effect on angiogenesis
Source: PeerJ journal article supplement (doi:10.7717/peerj.13498), 2022-07-22
Supplement: 4.flow_cytometry.zip [file 7.pdf › 4.flow cytometry/LC1126/7.pdf]

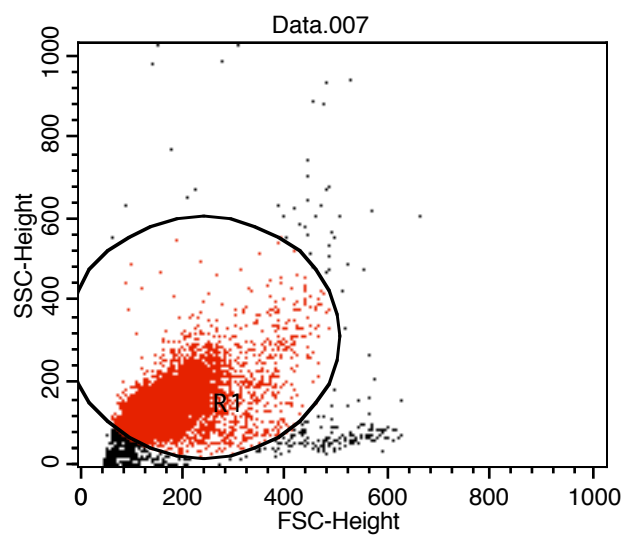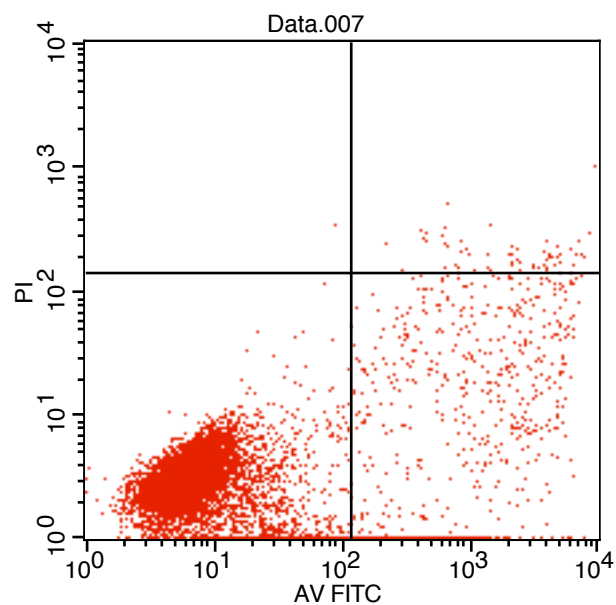

#### Quadrant Statistics

File: Data.007

Gate: G1

Gated Events: 10000

Total Events: 10624

X Parameter: AV FITC (Log)

Y Parameter: PI (Log)

| Quad | Events | % Gated | % Total | X Mean  | Y Mean |
|------|--------|---------|---------|---------|--------|
| UL   | 1      | 0.01    | 0.01    | 86.60   | 342.89 |
| UR   | 60     | 0.60    | 0.56    | 3000.17 | 217.83 |
| LL   | 7514   | 75.14   | 70.73   | 22.32   | 2.82   |
| LR   | 2425   | 24.25   | 22.83   | 621.42  | 7.25   |
