# Supplementary material for: Analysis of microRNA expression profiles in exosomes derived from acute myeloid leukemia by p62 knockdown and effect on angiogenesis
Source: PeerJ journal article supplement (doi:10.7717/peerj.13498), 2022-07-22
Supplement: 4.flow_cytometry.zip [file 7.pdf › 4.flow cytometry/LC1130/7.pdf]

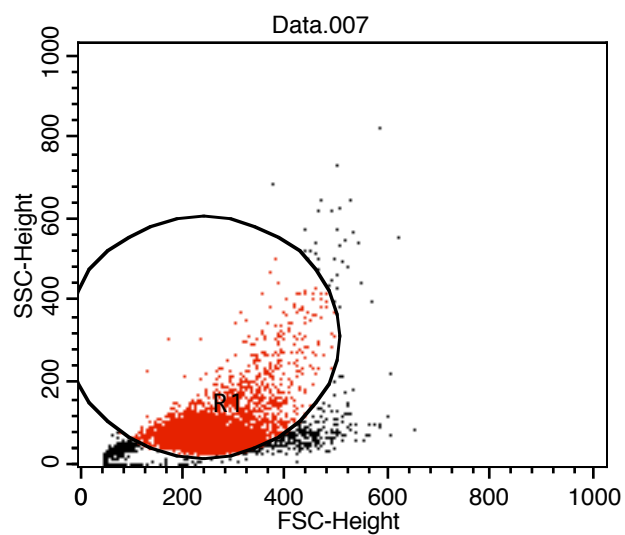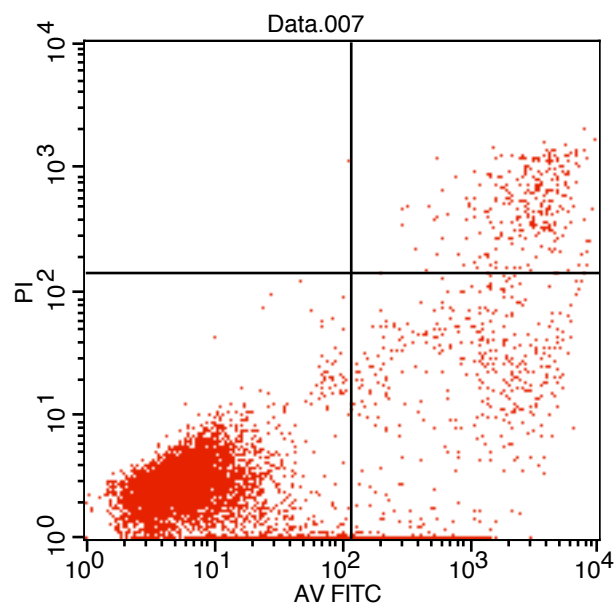

# Quadrant Statistics

File: Data.007 Gate: G1  
 Gated Events: 10000 Total Events: 10552  
 X Parameter: AV FITC (Log) Y Parameter: PI (Log)

| Quad | Events | % Gated | % Total | X Mean  | Y Mean  |
|------|--------|---------|---------|---------|---------|
| UL   | 1      | 0.01    | 0.01    | 114.44  | 1134.19 |
| UR   | 277    | 2.77    | 2.63    | 3375.05 | 603.35  |
| LL   | 7475   | 74.75   | 70.84   | 20.50   | 2.63    |
| LR   | 2247   | 22.47   | 21.29   | 543.76  | 6.39    |
