# Supplementary material for: Analysis of microRNA expression profiles in exosomes derived from acute myeloid leukemia by p62 knockdown and effect on angiogenesis
Source: PeerJ journal article supplement (doi:10.7717/peerj.13498), 2022-07-22
Supplement: 4.flow_cytometry.zip [file 7p62.pdf › 4.flow cytometry/7p62.pdf]

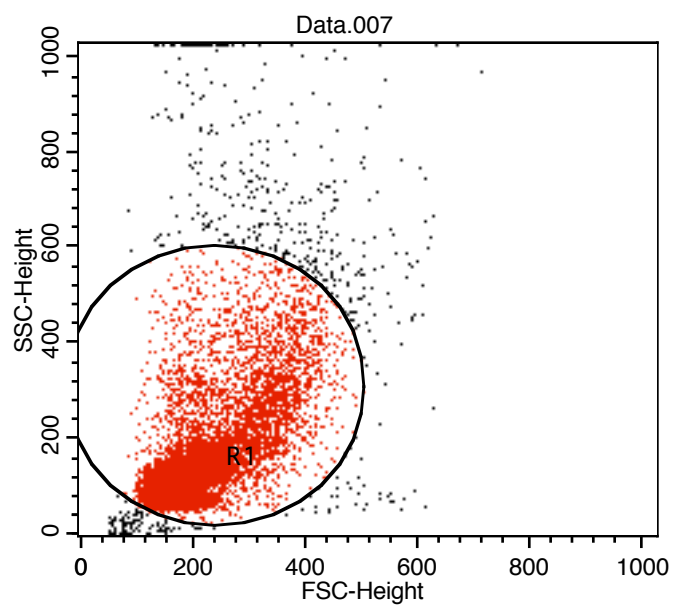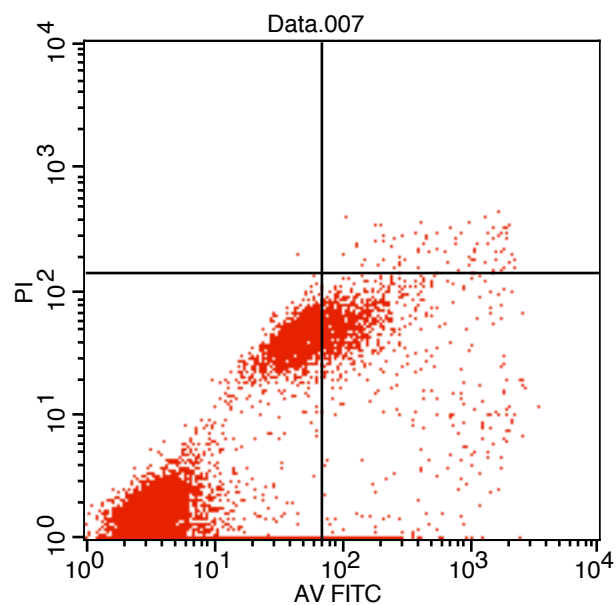

#### Quadrant Statistics

File: Data.007

Gate: G1

Gated Events: 10000

Total Events: 10521

X Parameter: AV FITC (Log)

Y Parameter: PI (Log)

| Quad | Events | % Gated | % Total | X Mean | Y Mean |
|------|--------|---------|---------|--------|--------|
| UL   | 1      | 0.01    | 0.01    | 44.51  | 191.10 |
| UR   | 74     | 0.74    | 0.70    | 908.30 | 232.71 |
| LL   | 8672   | 86.72   | 82.43   | 15.51  | 10.80  |
| LR   | 1253   | 12.53   | 11.91   | 243.17 | 43.28  |
