# Supplementary material for: Analysis of microRNA expression profiles in exosomes derived from acute myeloid leukemia by p62 knockdown and effect on angiogenesis
Source: PeerJ journal article supplement (doi:10.7717/peerj.13498), 2022-07-22
Supplement: 4.flow_cytometry.zip [file 8.pdf › 4.flow cytometry/LC1126/8.pdf]

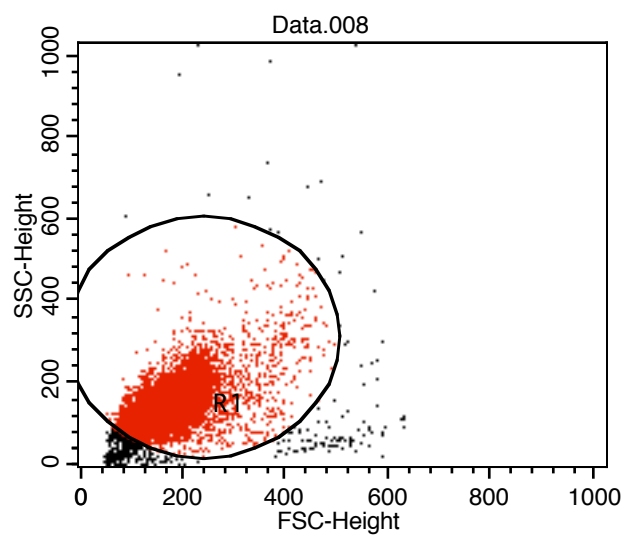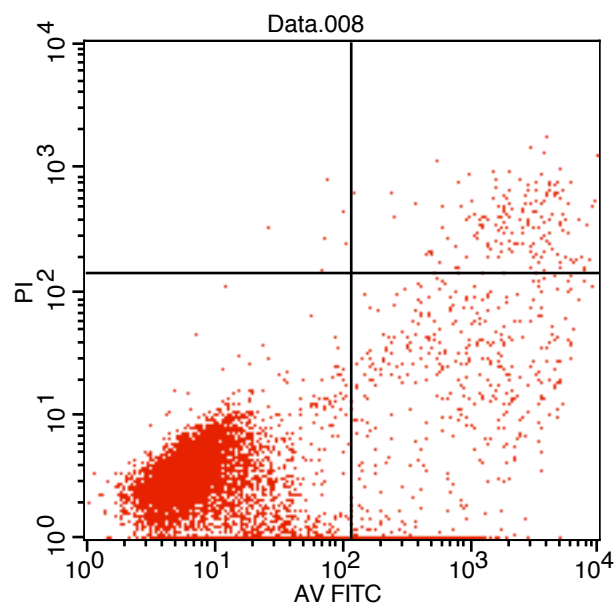

#### Quadrant Statistics

File: Data.008

Gate: G1

Gated Events: 10000

Total Events: 10500

X Parameter: AV FITC (Log)

Y Parameter: PI (Log)

| Quad | Events | % Gated | % Total | X Mean  | Y Mean |
|------|--------|---------|---------|---------|--------|
| UL   | 6      | 0.06    | 0.06    | 75.46   | 363.17 |
| UR   | 168    | 1.68    | 1.60    | 2944.26 | 416.43 |
| LL   | 7492   | 74.92   | 71.35   | 21.84   | 3.03   |
| LR   | 2334   | 23.34   | 22.23   | 488.26  | 5.93   |
