# Supplementary material for: Analysis of microRNA expression profiles in exosomes derived from acute myeloid leukemia by p62 knockdown and effect on angiogenesis
Source: PeerJ journal article supplement (doi:10.7717/peerj.13498), 2022-07-22
Supplement: 4.flow_cytometry.zip [file 8.pdf › 4.flow cytometry/LC1130/8.pdf]

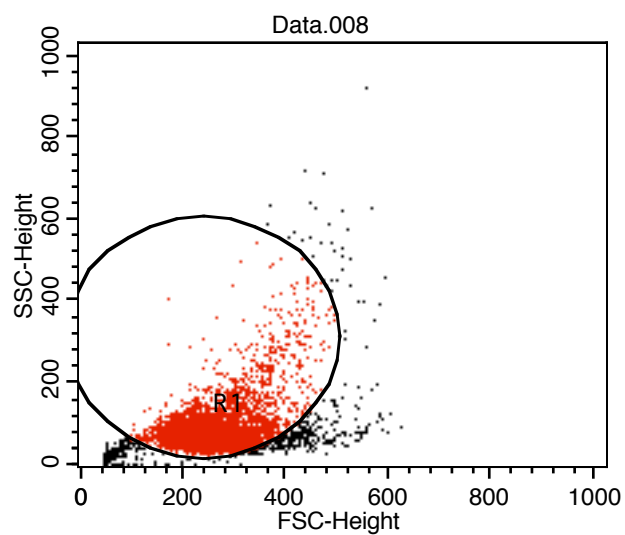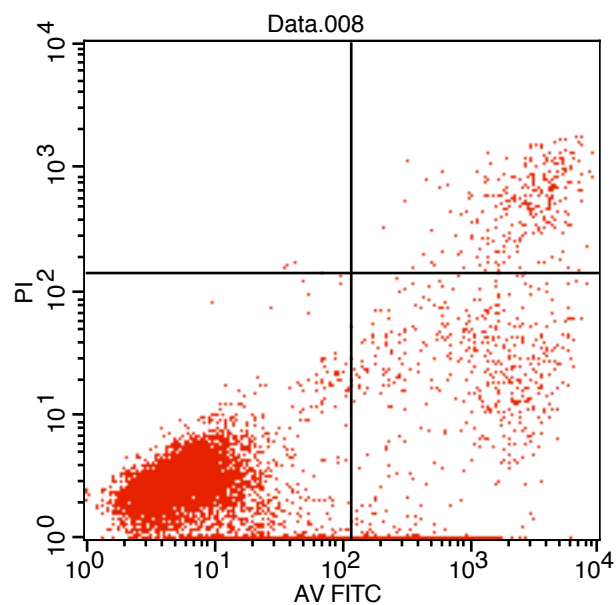

# Quadrant Statistics

File: Data.008 Gate: G1  
 Gated Events: 10000 Total Events: 10500  
 X Parameter: AV FITC (Log) Y Parameter: PI (Log)

| Quad | Events | % Gated | % Total | X Mean  | Y Mean |
|------|--------|---------|---------|---------|--------|
| UL   | 3      | 0.03    | 0.03    | 38.10   | 157.41 |
| UR   | 276    | 2.76    | 2.63    | 3282.46 | 615.32 |
| LL   | 7388   | 73.88   | 70.36   | 19.82   | 2.69   |
| LR   | 2333   | 23.33   | 22.22   | 598.44  | 7.14   |
