# Supplementary material for: Analysis of microRNA expression profiles in exosomes derived from acute myeloid leukemia by p62 knockdown and effect on angiogenesis
Source: PeerJ journal article supplement (doi:10.7717/peerj.13498), 2022-07-22
Supplement: 4.flow_cytometry.zip [file 9.pdf › 4.flow cytometry/LC1126/9.pdf]

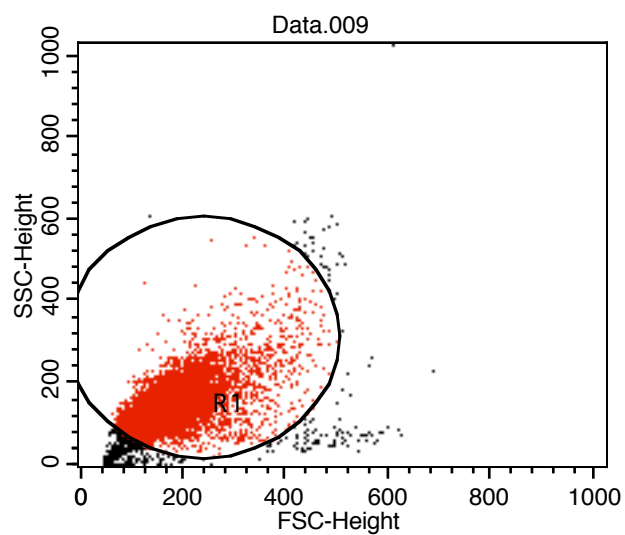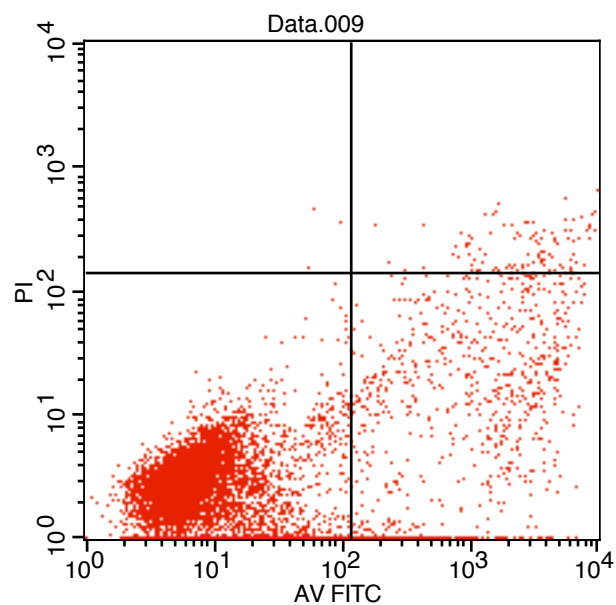

#### Quadrant Statistics

File: Data.009 Gate: G1  
 Gated Events: 10000 Total Events: 10600  
 X Parameter: AV FITC (Log) Y Parameter: PI (Log)

| Quad | Events | % Gated | % Total | X Mean  | Y Mean |
|------|--------|---------|---------|---------|--------|
| UL   | 3      | 0.03    | 0.03    | 70.58   | 323.15 |
| UR   | 104    | 1.04    | 0.98    | 3505.57 | 241.55 |
| LL   | 8161   | 81.61   | 76.99   | 20.62   | 2.88   |
| LR   | 1732   | 17.32   | 16.34   | 851.61  | 12.12  |
