# Supplementary material for: Analysis of microRNA expression profiles in exosomes derived from acute myeloid leukemia by p62 knockdown and effect on angiogenesis
Source: PeerJ journal article supplement (doi:10.7717/peerj.13498), 2022-07-22
Supplement: 4.flow_cytometry.zip [file 9.pdf › 4.flow cytometry/LC1130/9.pdf]

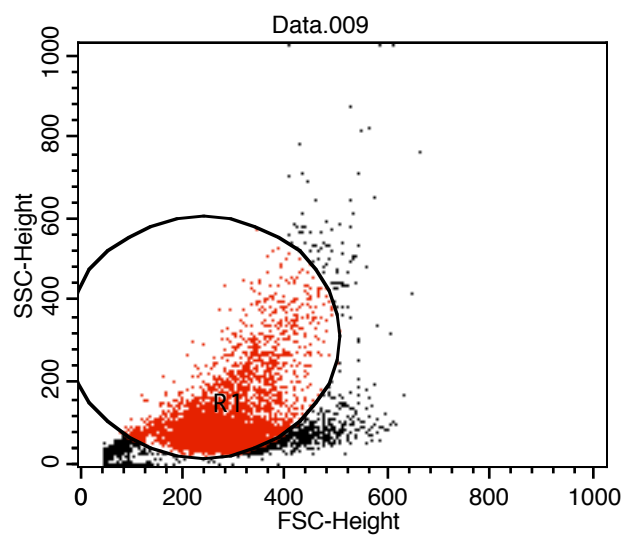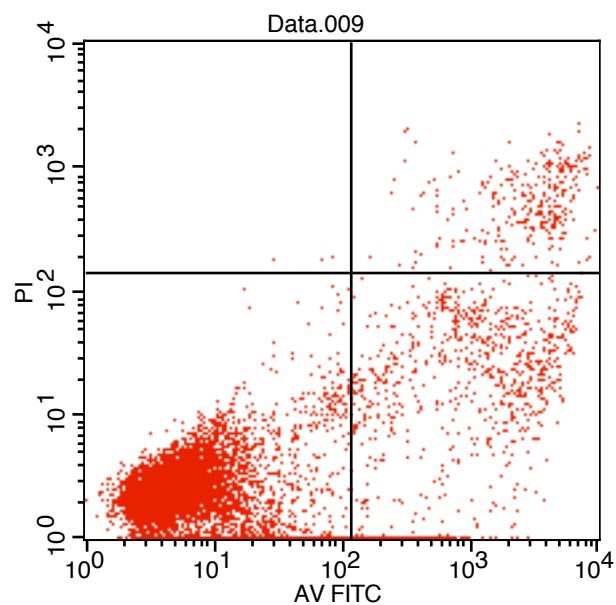

# Quadrant Statistics

File: Data.009 Gate: G1  
 Gated Events: 10000 Total Events: 11015  
 X Parameter: AV FITC (Log) Y Parameter: PI (Log)

| Quad | Events | % Gated | % Total | X Mean  | Y Mean |
|------|--------|---------|---------|---------|--------|
| UL   | 3      | 0.03    | 0.03    | 60.83   | 178.42 |
| UR   | 300    | 3.00    | 2.72    | 3541.38 | 622.14 |
| LL   | 8231   | 82.31   | 74.73   | 17.95   | 2.72   |
| LR   | 1466   | 14.66   | 13.31   | 1043.40 | 17.62  |
