# Supplementary material for: Analysis of microRNA expression profiles in exosomes derived from acute myeloid leukemia by p62 knockdown and effect on angiogenesis
Source: PeerJ journal article supplement (doi:10.7717/peerj.13498), 2022-07-22
Supplement: 4.flow_cytometry.zip [file 10.pdf › 4.flow cytometry/LC1126/10.pdf]

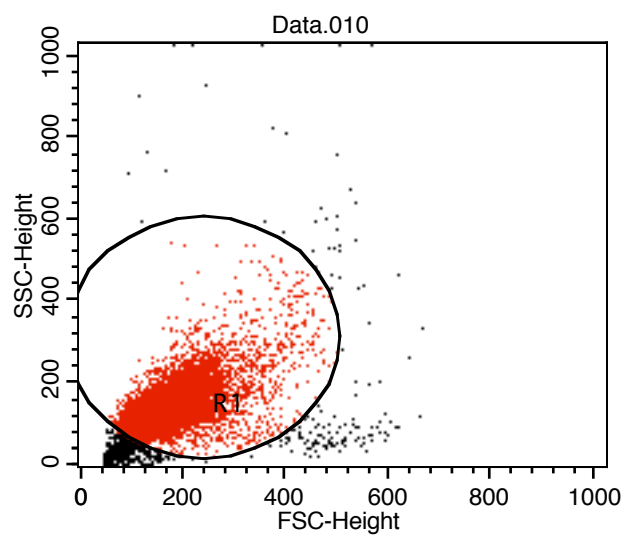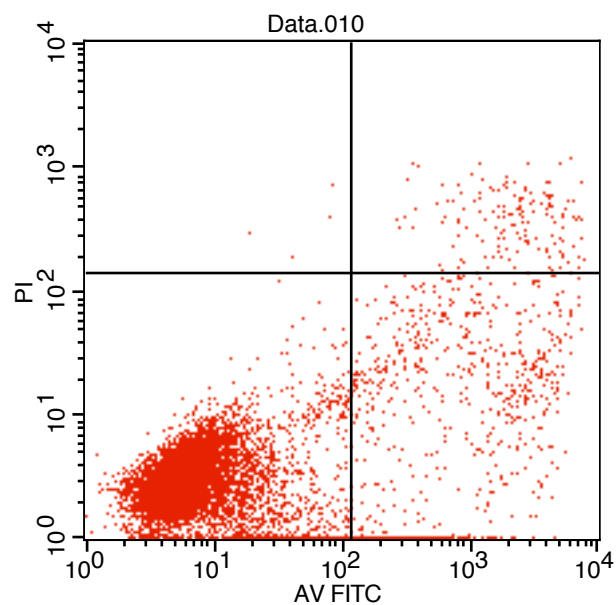

#### Quadrant Statistics

File: Data.010 Gate: G1  
 Gated Events: 10000 Total Events: 10644  
 X Parameter: AV FITC (Log) Y Parameter: PI (Log)

| Quad | Events | % Gated | % Total | X Mean  | Y Mean |
|------|--------|---------|---------|---------|--------|
| UL   | 4      | 0.04    | 0.04    | 55.85   | 393.70 |
| UR   | 149    | 1.49    | 1.40    | 2789.78 | 429.23 |
| LL   | 8248   | 82.48   | 77.49   | 19.70   | 3.09   |
| LR   | 1599   | 15.99   | 15.02   | 712.80  | 11.57  |
