# Supplementary material for: Analysis of microRNA expression profiles in exosomes derived from acute myeloid leukemia by p62 knockdown and effect on angiogenesis
Source: PeerJ journal article supplement (doi:10.7717/peerj.13498), 2022-07-22
Supplement: 4.flow_cytometry.zip [file 10.pdf › 4.flow cytometry/LC1130/10.pdf]

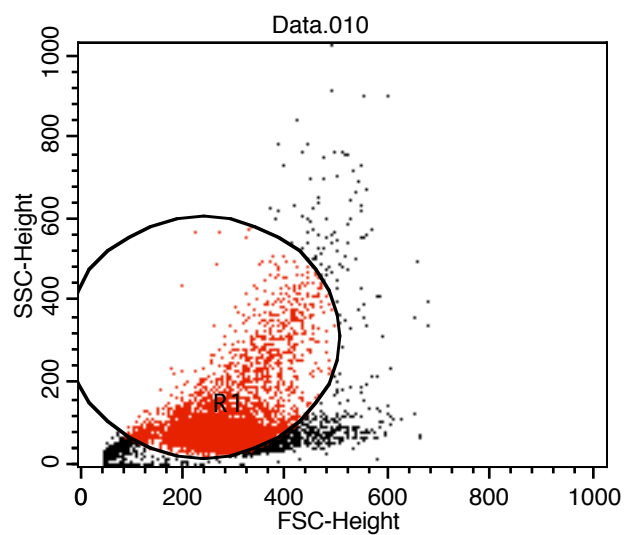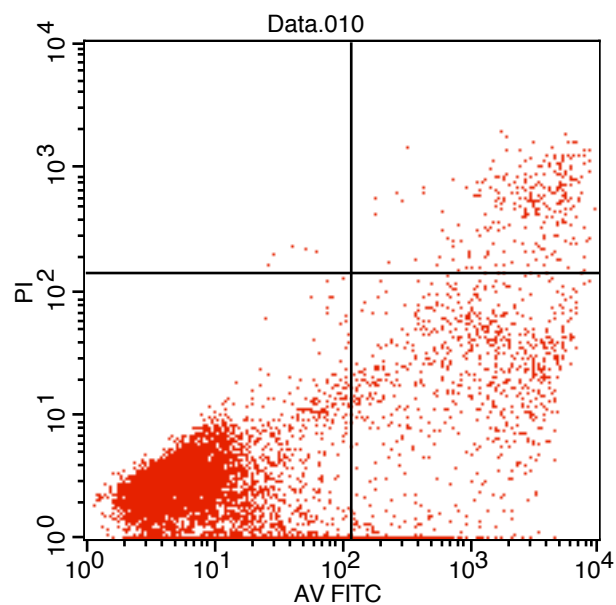

# Quadrant Statistics

File: Data.010 Gate: G1  
 Gated Events: 10000 Total Events: 11033  
 X Parameter: AV FITC (Log) Y Parameter: PI (Log)

| Quad | Events | % Gated | % Total | X Mean  | Y Mean |
|------|--------|---------|---------|---------|--------|
| UL   | 5      | 0.05    | 0.05    | 42.41   | 199.67 |
| UR   | 277    | 2.77    | 2.51    | 3625.16 | 608.05 |
| LL   | 8190   | 81.90   | 74.23   | 18.40   | 2.71   |
| LR   | 1528   | 15.28   | 13.85   | 1022.69 | 16.61  |
