# Supplementary material for: Analysis of microRNA expression profiles in exosomes derived from acute myeloid leukemia by p62 knockdown and effect on angiogenesis
Source: PeerJ journal article supplement (doi:10.7717/peerj.13498), 2022-07-22
Supplement: 4.flow_cytometry.zip [file 11.pdf › 4.flow cytometry/LC1126/11.pdf]

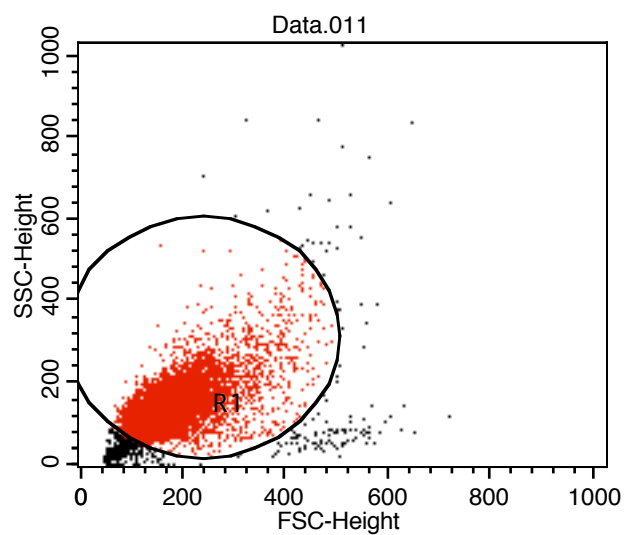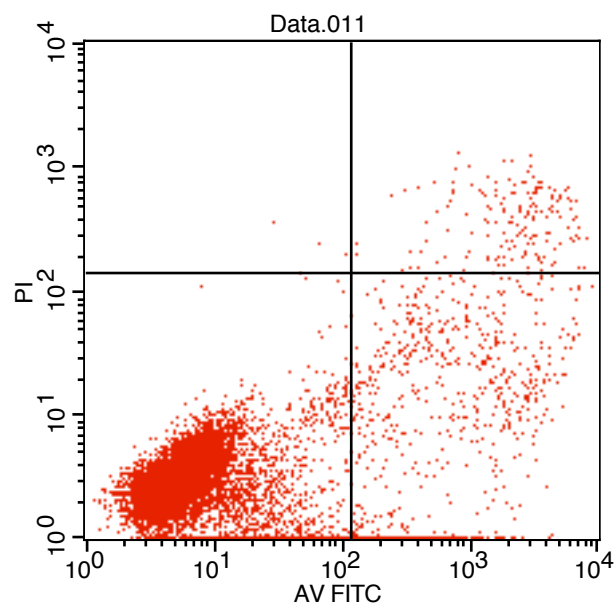

#### Quadrant Statistics

File: Data.011 Gate: G1  
 Gated Events: 10000 Total Events: 10545  
 X Parameter: AV FITC (Log) Y Parameter: PI (Log)

| Quad | Events | % Gated | % Total | X Mean  | Y Mean |
|------|--------|---------|---------|---------|--------|
| UL   | 4      | 0.04    | 0.04    | 62.92   | 230.60 |
| UR   | 162    | 1.62    | 1.54    | 2801.56 | 437.57 |
| LL   | 8204   | 82.04   | 77.80   | 19.61   | 3.08   |
| LR   | 1630   | 16.30   | 15.46   | 613.87  | 10.56  |
