# Supplementary material for: Analysis of microRNA expression profiles in exosomes derived from acute myeloid leukemia by p62 knockdown and effect on angiogenesis
Source: PeerJ journal article supplement (doi:10.7717/peerj.13498), 2022-07-22
Supplement: 4.flow_cytometry.zip [file 11.pdf › 4.flow cytometry/LC1130/11.pdf]

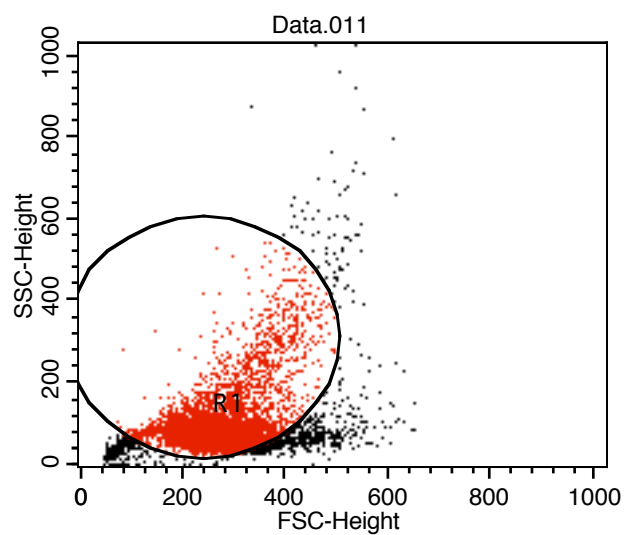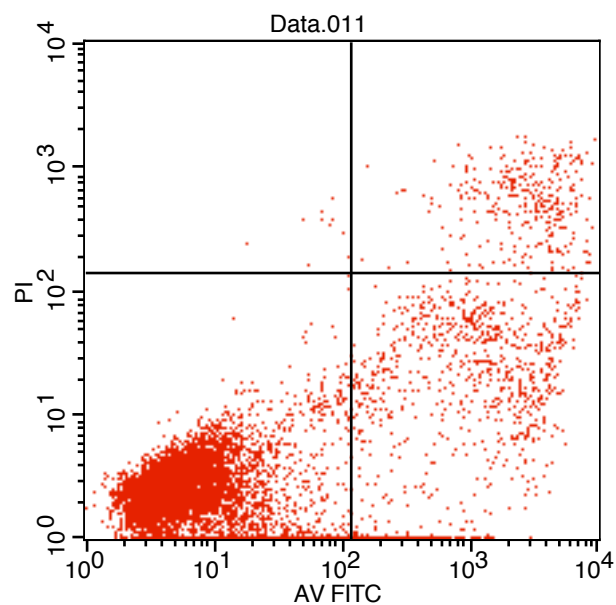

#### Quadrant Statistics

File: Data.011 Gate: G1  
 Gated Events: 10000 Total Events: 10987  
 X Parameter: AV FITC (Log) Y Parameter: PI (Log)

| Quad | Events | % Gated | % Total | X Mean  | Y Mean |
|------|--------|---------|---------|---------|--------|
| UL   | 10     | 0.10    | 0.09    | 72.49   | 334.01 |
| UR   | 332    | 3.32    | 3.02    | 3437.06 | 612.02 |
| LL   | 8085   | 80.85   | 73.59   | 18.51   | 2.61   |
| LR   | 1573   | 15.73   | 14.32   | 984.68  | 16.46  |
