# Supplementary material for: Analysis of microRNA expression profiles in exosomes derived from acute myeloid leukemia by p62 knockdown and effect on angiogenesis
Source: PeerJ journal article supplement (doi:10.7717/peerj.13498), 2022-07-22
Supplement: 4.flow_cytometry.zip [file 新建 Microsoft Excel 工作表.xlsx]

## Sheet: Sheet1
	1126				1130
	UR	LR	TOTAL		UR	LR	TOTAL
U937	0.01	5.42	5.43		0	7.33	7.33
U937	0.57	4.81	5.38		2.96	4.56	7.52
U937	1.32	4.43	5.75		3.18	4.36	7.54
control	1.47	23.49	24.96		2.65	23.19	25.84
control	0.6	24.25	24.85		2.77	22.47	25.24
control	1.68	23.34	25.02		2.76	23.33	26.09
P62	1.04	17.32	18.36		3	14.66	17.66
P62	1.49	15.99	17.48		2.77	15.28	18.05
P62	1.62	16.3	17.92		3.32	15.73	19.05

## Sheet: Sheet2
			CCK8
