# Supplementary material for: Analysis of microRNA expression profiles in exosomes derived from acute myeloid leukemia by p62 knockdown and effect on angiogenesis
Source: PeerJ journal article supplement (doi:10.7717/peerj.13498), 2022-07-22
Supplement: huvec+exoCCK8_-1.zip [file 0h-490.xls]

## Sheet: 板 1 - Sheet1
			1	1	1	2	2	2	3	3	3
		1	2	3	4	5	6	7	8	9	10	11	12
	A	0.035	0.035	0.037	0.038	0.041	0.044	0.05	0.06	0.071	0.085	0.097	0.12	490
	H	0.034	0.314	0.37	0.393	0.377	0.372	0.345	0.39	0.441	0.432	0.123	0.145	490
	H+U	0.034	0.345	0.322	0.345	0.393	0.408	0.412	0.426	0.443	0.46	0.119	0.134	490
	h+C	0.034	0.331	0.367	0.397	0.377	0.415	0.406	0.401	0.452	0.484	0.094	0.103	490
	H+p	0.035	0.441	0.403	0.413	0.417	0.435	0.438	0.451	0.463	0.477	0.117	0.136	490
	Control	0.035	0.112	0.115	0.118	0.12	0.13	0.141	0.149	0.161	0.173	0.108	0.118	490
	G	0.035	0.036	0.038	0.039	0.043	0.048	0.053	0.059	0.067	0.074	0.08	0.09	490
	H	0.039	0.038	0.038	0.04	0.04	0.041	0.04	0.041	0.041	0.04	0.04	0.04	490
