# Supplementary material for: Analysis of microRNA expression profiles in exosomes derived from acute myeloid leukemia by p62 knockdown and effect on angiogenesis
Source: PeerJ journal article supplement (doi:10.7717/peerj.13498), 2022-07-22
Supplement: huvec+exoCCK8_-1.zip [file 12h-490.xls]

## Sheet: 板 1 - Sheet1
		1	2	3	4	5	6	7	8	9	10	11	12
	A	0.034	0.035	0.036	0.038	0.039	0.039	0.046	0.043	0.043	0.046	0.049	0.055	490
	B	0.035	0.631	0.681	0.659	0.489	0.607	0.598	0.605	0.61	0.547	0.059	0.07	490
	C	0.034	0.768	0.78	0.759	0.738	0.729	0.739	0.787	0.765	0.841	0.073	0.084	490
	D	0.035	0.72	0.704	0.718	0.713	0.688	0.7	0.766	0.758	0.751	0.056	0.061	490
	E	0.036	0.743	0.703	0.737	0.689	0.73	0.73	0.666	0.723	0.692	0.068	0.078	490
	F	0.035	0.117	0.118	0.12	0.123	0.133	0.135	0.127	0.131	0.135	0.055	0.063	490
	G	0.036	0.058	0.037	0.044	0.042	0.044	0.043	0.047	0.044	0.046	0.05	0.048	490
	H	0.039	0.04	0.041	0.041	0.039	0.039	0.04	0.044	0.04	0.04	0.04	0.04	490
