# Supplementary material for: Analysis of microRNA expression profiles in exosomes derived from acute myeloid leukemia by p62 knockdown and effect on angiogenesis
Source: PeerJ journal article supplement (doi:10.7717/peerj.13498), 2022-07-22
Supplement: huvec+exoCCK8_-1.zip [file 48h-490.xls]

## Sheet: Plate 1 - Sheet1
			1	1	1	2	2	2	3	3	3
	48h	1	2	3	4	5	6	7	8	9	10	11	12
	A	0.034	0.036	0.039	0.049	0.052	0.06	0.071	0.086	0.104	0.121	0.136	0.165	490
	H	0.036	1.037	1.138	1.044	1.099	1.075	1.065	1.063	1.194	1.152	0.159	0.186	490
	H+U	0.036	1.006	0.976	0.947	0.995	0.975	1.1	1.034	1.053	1.005	0.155	0.17	490
	h+C	0.037	0.94	0.944	0.938	1.043	0.991	1.001	1.001	1.066	0.98	0.126	0.137	490
	H+p	0.037	0.964	0.817	0.955	0.99	0.973	0.981	0.99	1.023	1.054	0.133	0.154	490
	Control	0.035	0.111	0.117	0.122	0.126	0.139	0.147	0.154	0.16	0.171	0.112	0.127	490
	G	0.036	0.039	0.042	0.047	0.052	0.062	0.069	0.078	0.089	0.099	0.109	0.126	490
	H	0.039	0.041	0.041	0.041	0.042	0.043	0.044	0.044	0.044	0.045	0.046	0.046	490

## Sheet: Sheet1
		1	1	1	2	2	2	3	3	3
0h	1	2	3	4	5	6	7	8	9	10	11	12
A	0.035	0.035	0.037	0.038	0.041	0.044	0.05	0.06	0.071	0.085	0.097	0.12	490
H	0.034	0.314	0.37	0.393	0.377	0.372	0.345	0.39	0.441	0.432	0.123	0.145	490
H+U	0.034	0.345	0.322	0.345	0.393	0.408	0.412	0.426	0.443	0.46	0.119	0.134	490
h+C	0.034	0.331	0.367	0.397	0.377	0.415	0.406	0.401	0.452	0.484	0.094	0.103	490
H+p	0.035	0.441	0.403	0.413	0.417	0.435	0.438	0.451	0.463	0.477	0.117	0.136	490
Control	0.035	0.112	0.115	0.118	0.12	0.13	0.141	0.149	0.161	0.173	0.108	0.118	490
G	0.035	0.036	0.038	0.039	0.043	0.048	0.053	0.059	0.067	0.074	0.08	0.09	490
H	0.039	0.038	0.038	0.04	0.04	0.041	0.04	0.041	0.041	0.04	0.04	0.04	490
			1	1	1	2	2	2	3	3	3
	12h	1	2	3	4	5	6	7	8	9	10	11	12
	A	0.034	0.035	0.036	0.038	0.039	0.039	0.046	0.043	0.043	0.046	0.049	0.055	490
	H	0.035	0.631	0.681	0.659	0.489	0.607	0.598	0.605	0.61	0.547	0.059	0.07	490
	H+U	0.034	0.768	0.78	0.759	0.738	0.729	0.739	0.787	0.765	0.841	0.073	0.084	490
	h+C	0.035	0.72	0.704	0.718	0.713	0.688	0.7	0.766	0.758	0.751	0.056	0.061	490
	H+p	0.036	0.743	0.703	0.737	0.689	0.73	0.73	0.666	0.723	0.692	0.068	0.078	490
	Control	0.035	0.117	0.118	0.12	0.123	0.133	0.135	0.127	0.131	0.135	0.055	0.063	490
	G	0.036	0.058	0.037	0.044	0.042	0.044	0.043	0.047	0.044	0.046	0.05	0.048	490
	H	0.039	0.04	0.041	0.041	0.039	0.039	0.04	0.044	0.04	0.04	0.04	0.04	490
			1	1	1	2	2	2	3	3	3
	24h	1	2	3	4	5	6	7	8	9	10	11	12
	A	0.035	0.034	0.035	0.035	0.035	0.035	0.036	0.036	0.038	0.04	0.042	0.048	490
	H	0.035	0.768	0.874	0.86	0.833	0.881	0.87	0.914	0.899	0.847	0.044	0.051	490
	H+U	0.034	0.766	0.741	0.808	0.852	0.791	0.793	0.836	0.748	0.883	0.057	0.062	490
	h+C	0.034	0.877	0.84	0.903	0.78	0.773	0.807	0.76	0.832	0.742	0.04	0.043	490
	H+p	0.036	0.81	0.801	0.802	0.779	0.733	0.814	0.824	0.769	0.758	0.052	0.058	490
	Control	0.035	0.103	0.104	0.105	0.107	0.107	0.108	0.109	0.113	0.098	0.042	0.046	490
	G	0.035	0.037	0.037	0.037	0.039	0.037	0.038	0.039	0.038	0.039	0.04	0.042	490
	H	0.039	0.039	0.039	0.039	0.039	0.039	0.039	0.039	0.039	0.039	0.039	0.039	490
			1	1	1	2	2	2	3	3	3
	48h	1	2	3	4	5	6	7	8	9	10	11	12
	A	0.034	0.036	0.039	0.049	0.052	0.06	0.071	0.086	0.104	0.121	0.136	0.165	490
	H	0.036	1.037	1.138	1.044	1.099	1.075	1.065	1.063	1.194	1.152	0.159	0.186	490
	H+U	0.036	1.006	0.976	0.947	0.995	0.975	1.1	1.034	1.053	1.005	0.155	0.17	490
	h+C	0.037	0.94	0.944	0.938	1.043	0.991	1.001	1.001	1.066	0.98	0.126	0.137	490
	H+p	0.037	0.964	0.817	0.955	0.99	0.973	0.981	0.99	1.023	1.054	0.133	0.154	490
	Control	0.035	0.111	0.117	0.122	0.126	0.139	0.147	0.154	0.16	0.171	0.112	0.127	490
	G	0.036	0.039	0.042	0.047	0.052	0.062	0.069	0.078	0.089	0.099	0.109	0.126	490
	H	0.039	0.041	0.041	0.041	0.042	0.043	0.044	0.044	0.044	0.045	0.046	0.046	490
