# Supplementary material for: Analysis of microRNA expression profiles in exosomes derived from acute myeloid leukemia by p62 knockdown and effect on angiogenesis
Source: PeerJ journal article supplement (doi:10.7717/peerj.13498), 2022-07-22
Supplement: huvec+exoCCK8_-1.zip [file Total.xlsx]

## Sheet: Sheet1
0h	1	1	1		2	2	2		3	3	3			0h	1	2	3	Control1	Control2	Control3	1	2	3
H	0.314	0.37	0.393	0.359	0.377	0.372	0.345	0.364667	0.39	0.441	0.432	0.421		H	0.359	0.364667	0.421	0.115	0.130333	0.161	0.244	0.234333	0.26
H+U	0.345	0.322	0.345	0.337333	0.393	0.408	0.412	0.404333	0.426	0.443	0.46	0.443		H+U	0.337333	0.404333	0.443	0.115	0.130333	0.161	0.222333	0.274	0.282
h+C	0.331	0.367	0.397	0.365	0.377	0.415	0.406	0.399333	0.401	0.452	0.484	0.445667		h+C	0.365	0.399333	0.445667	0.115	0.130333	0.161	0.25	0.269	0.284667
H+p	0.441	0.403	0.413	0.419	0.417	0.435	0.438	0.43	0.451	0.463	0.477	0.463667		H+p	0.419	0.43	0.463667	0.115	0.130333	0.161	0.304	0.299667	0.302667
Control	0.112	0.115	0.118	0.115	0.12	0.13	0.141	0.130333	0.149	0.161	0.173	0.161		Control
12h	1	1	1	1	2	2	2		3	3	3			12
H	0.631	0.681	0.659	0.657	0.489	0.607	0.598	0.564667	0.605	0.61	0.547	0.587333		H	0.657	0.564667	0.587333	0.118333	0.130333	0.131	0.538667	0.434333	0.456333
H+U	0.768	0.78	0.759	0.769	0.738	0.729	0.739	0.735333	0.787	0.765	0.841	0.797667		H+U	0.769	0.735333	0.797667	0.118333	0.130333	0.131	0.650667	0.605	0.666667
h+C	0.72	0.704	0.718	0.714	0.713	0.688	0.7	0.700333	0.766	0.758	0.751	0.758333		h+C	0.714	0.700333	0.758333	0.118333	0.130333	0.131	0.595667	0.57	0.627333
H+p	0.743	0.703	0.737	0.727667	0.689	0.73	0.73	0.716333	0.666	0.723	0.692	0.693667		H+p	0.727667	0.716333	0.693667	0.118333	0.130333	0.131	0.609333	0.586	0.562667
Control	0.117	0.118	0.12	0.118333	0.123	0.133	0.135	0.130333	0.127	0.131	0.135	0.131		Control
24h	1	1	1	1	2	2	2		3	3	3			24
A	0.768	0.874	0.86	0.834	0.833	0.881	0.87	0.861333	0.914	0.899	0.847	0.886667		H	0.834	0.861333	0.886667	0.104	0.107333	0.106667	0.73	0.754	0.78
H	0.766	0.741	0.808	0.771667	0.852	0.791	0.793	0.812	0.836	0.748	0.883	0.822333		H+U	0.771667	0.812	0.822333	0.104	0.107333	0.106667	0.667667	0.704667	0.715667
H+U	0.877	0.84	0.903	0.873333	0.78	0.773	0.807	0.786667	0.76	0.832	0.742	0.778		h+C	0.873333	0.786667	0.778	0.104	0.107333	0.106667	0.769333	0.679333	0.671333
h+C	0.81	0.801	0.802	0.804333	0.779	0.733	0.814	0.775333	0.824	0.769	0.758	0.783667		H+p	0.804333	0.775333	0.783667	0.104	0.107333	0.106667	0.700333	0.668	0.677
H+p	0.103	0.104	0.105	0.104	0.107	0.107	0.108	0.107333	0.109	0.113	0.098	0.106667		Control
48h	1	1	1	1	2	2	2		3	3	3
H	1.037	1.138	1.044	1.073	1.099	1.075	1.065	1.07967	1.063	1.194	1.152	1.13633		H	1.073	1.07967	1.13633	0.116667	0.137333	0.161667	0.956333	0.942333	0.974667
H+U	1.006	0.976	0.947	0.976333	0.995	0.975	1.1	1.02333	1.034	1.053	1.005	1.03067		H+U	0.976333	1.02333	1.03067	0.116667	0.137333	0.161667	0.859667	0.886	0.869
h+C	0.94	0.944	0.938	0.940667	1.043	0.991	1.001	1.01167	1.001	1.066	0.98	1.01567		h+C	0.940667	1.01167	1.01567	0.116667	0.137333	0.161667	0.824	0.874333	0.854
H+p	0.964	0.817	0.955	0.912	0.99	0.973	0.981	0.981333	0.99	1.023	1.054	1.02233		H+p	0.912	0.981333	1.02233	0.116667	0.137333	0.161667	0.795333	0.844	0.860667
Control	0.111	0.117	0.122	0.116667	0.126	0.139	0.147	0.137333	0.154	0.16	0.171	0.161667		Control

## Sheet: Sheet2
							0	0	0		12	12	12		24	24	24		48	48	48
							1	2	3
						H	0.244	0.234333	0.26		0.538667	0.434333	0.456333
						H+U	0.222333	0.274	0.282		0.650667	0.605	0.666667
						h+C	0.25	0.269	0.284667		0.595667	0.57	0.627333
						H+p	0.304	0.299667	0.302667		0.609333	0.586	0.562667
		H	H+U	h+C	H+p
	0	0.244	0.222333	0.25	0.304
	0	0.234333	0.274	0.269	0.299667
	0	0.26	0.282	0.284667	0.302667
	12	0.538667	0.650667	0.595667	0.609333
	12	0.434333	0.605	0.57	0.586			H	H	H	H+U	H+U	H+U	h+C	h+C	h+C	H+p	H+p	H+p
	12	0.456333	0.666667	0.627333	0.562667		0	0.244	0.234333	0.26	0.222333	0.274	0.282	0.25	0.269	0.284667	0.304	0.299667	0.302667
	24	0.73	0.667667	0.769333	0.700333		12	0.538667	0.434333	0.456333	0.650667	0.605	0.666667	0.595667	0.57	0.627333	0.609333	0.586	0.562667
	24	0.754	0.704667	0.679333	0.668		24	0.73	0.754	0.78	0.667667	0.704667	0.715667	0.769333	0.679333	0.671333	0.700333	0.668	0.677
	24	0.78	0.715667	0.671333	0.677		48	0.956333	0.942333	0.974667	0.859667	0.886	0.869	0.824	0.874333	0.854	0.795333	0.844	0.860667
	48	0.956333	0.859667	0.824	0.795333
	48	0.942333	0.886	0.874333	0.844
	48	0.974667	0.869	0.854	0.860667
