# Supplementary material for: Analysis of microRNA expression profiles in exosomes derived from acute myeloid leukemia by p62 knockdown and effect on angiogenesis
Source: PeerJ journal article supplement (doi:10.7717/peerj.13498), 2022-07-22
Supplement: microarray_analysis_raw_data.zip [file GA_single_ch(withPlatformID).xls]

## Sheet: Metadata Template
# Use this template for non-Affymetrix single channel submissions if you used an array already represented in GEO (for example, a commercial array).
# An accompanying matrix table example is included in the second worksheet. Click on the Matrix tab below.
# Most fields in this template must be completed. Incomplete submissions will be returned.
# Field names (in blue on this page) should not be edited. Hover over cells containing field names to view field content guidelines or,
# CLICK HERE for Field Content Guidelines Web page.
# If you are submitting data associated with Copy Number Variation detection, consider submitting your Copy Number Variation calls to dbVar (http://www.ncbi.nlm.nih.gov/dbvar). This will allow users to easily see your results (with links to the raw data) and to view your results in the context of other CNV and structural variation studies. dbVar submission instructions are at http://www.ncbi.nlm.…
SERIES
# This section describes the overall experiment.
title
summary
summary
overall design
contributor
contributor
SAMPLES
# The Sample names in the first column are arbitrary but they must match the column headers of the Matrix table (see next worksheet).
# CLICK HERE to find the platform accession number (GPLxxxx).
Sample name	title	raw data file	source name	organism	characteristics: Tag	molecule	label	description	platform
SAMPLE 1
SAMPLE 2
SAMPLE 3
SAMPLE 4
SAMPLE 5
SAMPLE 6
SAMPLE 7
SAMPLE 8
SAMPLE 9
SAMPLE X
PROTOCOLS
# This section includes protocols and fields which are common to all Samples.
# Protocols which are applicable to specific Samples or specific channels should be included in additional columns of the SAMPLES section instead.
growth protocol
treatment protocol
extract protocol
label protocol
hyb protocol
scan protocol
data processing
value definition

## Sheet: Matrix
# Example of a matrix table for a single channel (non-Affymetrix) submission. Only column headers are shown.
# The identifiers in the ID_REF column must match the identifiers in the ID column of the referenced platform (GPLxxxx).
# The Matrix table should include normalized (scaled) signal count data.
# Values that should be disregarded may either be left blank or labeled as "null".
ID_REF	SAMPLE 1	SAMPLE 2	SAMPLE 3	SAMPLE 4	SAMPLE 5	SAMPLE 6	SAMPLE 7	SAMPLE 8	SAMPLE 9	SAMPLE X

## Sheet: Metadata Example
SERIES
title	Gene expression-based, individualized outcome prediction for surgically treated lung cancer patients
summary	Individualized outcome prediction classifiers were successfully constructed through expression profiling of a total of 8,644 genes in 50 non-small cell lung cancer (NSCLC) cases, which had been consecutively operated on within a defined short period of ti
overall design	In the study presented here, a consecutively operated, well-defined cohort of 50 NSCLC cases, followed up more than five years, was used to acquire expression profiles of a total of 8,644 unique genes, leading to the successful construction of supervised
contributor	Jane,Doe
contributor	John,A,Smith
SAMPLES
# The corresponding example matrix table is included in the next worksheet.
Sample name	title	raw data file	source name	organism	characteristics: Tissue	characteristics: Status after 5 years	characteristics: Histology	characteristics: Age	characteristics: Sex	characteristics: Stage	molecule	label	description	platform
GF200_001	Patient 1 GF200 001	GF200_001.txt	primary lung cancer	Homo sapiens	primary lung cancer	Alive	SQ	61 years	Male	IIB	total RNA	33P	Total genomic DNA was spotted on 192 spots for positive control. Nothing was spotted on 40 spot with the aim of negative control. Therefore, a total of 232 spot data were already eliminated from the whole 5584 spot data on the GF201 array.	GPL3694
GF200_002	Patient 2 GF200 002	GF200_002.txt	primary lung cancer	Homo sapiens	primary lung cancer	Dead	SQ	63 years	Male	IIIA	total RNA	33P	Total genomic DNA was spotted on 192 spots for positive control. Nothing was spotted on 40 spot with the aim of negative control. Therefore, a total of 232 spot data were already eliminated from the whole 5584 spot data on the GF201 array.	GPL3694
GF200_003	Patient 3 GF200 003	GF200_003.txt	primary lung cancer	Homo sapiens	primary lung cancer	Alive	LA	68 years	Male	IB	total RNA	33P	Total genomic DNA was spotted on 192 spots for positive control. Nothing was spotted on 40 spot with the aim of negative control. Therefore, a total of 232 spot data were already eliminated from the whole 5584 spot data on the GF201 array.	GPL3694
GF200_004	Patient 4 GF200 004	GF200_004.txt	primary lung cancer	Homo sapiens	primary lung cancer	Dead	AD	71 years	Male	IB	total RNA	33P	Total genomic DNA was spotted on 192 spots for positive control. Nothing was spotted on 40 spot with the aim of negative control. Therefore, a total of 232 spot data were already eliminated from the whole 5584 spot data on the GF201 array.	GPL3694
GF200_005	Patient 5 GF200 005	GF200_005.txt	primary lung cancer	Homo sapiens	primary lung cancer	Alive	AD	49 years	Female	IA	total RNA	33P	Total genomic DNA was spotted on 192 spots for positive control. Nothing was spotted on 40 spot with the aim of negative control. Therefore, a total of 232 spot data were already eliminated from the whole 5584 spot data on the GF201 array.	GPL3694
GF200_006	Patient 6 GF200 006	GF200_006.txt	primary lung cancer	Homo sapiens	primary lung cancer	Dead	AD	51 years	Female	IIIA	total RNA	33P	Total genomic DNA was spotted on 192 spots for positive control. Nothing was spotted on 40 spot with the aim of negative control. Therefore, a total of 232 spot data were already eliminated from the whole 5584 spot data on the GF201 array.	GPL3694
GF200_007	Patient 7 GF200 007	GF200_007.txt	primary lung cancer	Homo sapiens	primary lung cancer	Alive	AD	51 years	Female	IIA	total RNA	33P	Total genomic DNA was spotted on 192 spots for positive control. Nothing was spotted on 40 spot with the aim of negative control. Therefore, a total of 232 spot data were already eliminated from the whole 5584 spot data on the GF201 array.	GPL3694
GF200_008	Patient 8 GF200 008	GF200_008.txt	primary lung cancer	Homo sapiens	primary lung cancer	Dead	AD	67 years	Female	IIIA	total RNA	33P	Total genomic DNA was spotted on 192 spots for positive control. Nothing was spotted on 40 spot with the aim of negative control. Therefore, a total of 232 spot data were already eliminated from the whole 5584 spot data on the GF201 array.	GPL3694
GF200_009	Patient 9 GF200 009	GF200_009.txt	primary lung cancer	Homo sapiens	primary lung cancer	Alive	AD	52 years	Male	IIIA	total RNA	33P	Total genomic DNA was spotted on 192 spots for positive control. Nothing was spotted on 40 spot with the aim of negative control. Therefore, a total of 232 spot data were already eliminated from the whole 5584 spot data on the GF201 array.	GPL3694
GF200_010	Patient 10 GF200 010	GF200_010.txt	primary lung cancer	Homo sapiens	primary lung cancer	Alive	LA	69 years	Male	IIA	total RNA	33P	Total genomic DNA was spotted on 192 spots for positive control. Nothing was spotted on 40 spot with the aim of negative control. Therefore, a total of 232 spot data were already eliminated from the whole 5584 spot data on the GF201 array.	GPL3694
PROTOCOLS
extract protocol	On average, 50 7 um-thick cryostat sections were prepared for the extraction of total RNA from tumor cell-rich areas, which were identified by a surgical pathologist (YY) using every 10th section stained by May-Giemsa. Careful attention was paid to the mi
label protocol	Five mg of total RNA was reverse-transcribed using oligo-dT primers (Invitrogen) and SuperScript II reverse transcriptase (Invitrogen) in the presence of 100 mCi of [33P]dCTP (Amersham Bioscience, Piscataway, NJ) according to the instructions for the Gene
hyb protocol	The GeneFilters were prehybridized for 2 h at 51C with 0.5 mg/ml of poly-dA (Invitrogen) and 0.5 mg/ml Cot-1 DNA (Invitrogen) in 10 ml of AlkPhos DIRECT hybridization buffer (Amersham Bioscience) and then hybridized for 17 h at 51C with the denatured radi
scan protocol	The arrays were then exposed for 2 hours to an Imaging Plate and scanned at 25-mm resolution with a BAS5000 phosphoimager (Fuji Photo Film), images of the hybridized arrays were processed with L Process (Fuji Photo Film) and signal intensities quantified
data processing	The raw data were re-scaled to account for the differences in individual hybridization intensities. We employed a rank-invariant scaling method to select genes (Tseng et al., 2001), which were then used for fitting of a non-linear normalization curve. A
value definition	Normalized signal intensity

## Sheet: Matrix Example
# truncated example of a matrix table
ID REF	GF200_001	GF200_002	GF200_003	GF200_004	GF200_005	GF200_006	GF200_007	GF200_008	GF200_009	GF200_010
8	1.856	1.320	1.100	5.132	2.893	1.629	0.623	4.324	0.811	1.033
9	173.711	163.516	199.105	171.180	181.289	194.333	169.150	176.541	190.919	199.860
10	2.564	2.936	1.611	1.895	1.693	1.598	1.420	1.406	1.648	2.120
11	0.951	0.682	0.250	0.795	0.388	0.467	0.146	0.377	0.172	0.411
12	0.176	0.142	0.024	0.169	0.132	0.170	0.040	0.148	0.043	0.144
13	1.359	1.271	0.475	1.799	1.111	1.931	0.662	1.962	0.908	0.919
14	13.028	17.314	16.810	9.780	13.919	11.375	18.059	17.410	12.921	11.815
15	0.445	0.331	0.144	0.443	0.399	0.279	0.202	0.417	0.184	0.263
16	1.705	1.204	1.354	1.550	0.908	1.262	0.642	2.124	1.430	0.797
17	1.089	1.269	0.624	3.147	2.214	2.970	2.136	1.783	1.916	0.469
18	0.314	0.108	0.025	0.339	0.122	0.355	0.048	0.270	0.059	0.068
19	5.633	1.787	1.230	1.207	6.912	1.339	4.087	5.483	2.201	0.804
26	0.358	0.075	0.059	0.166	0.287	0.196	0.082	0.241	0.061	0.122
27	0.367	0.117	0.058	0.414	0.210	0.211	0.077	0.258	0.044	0.261
28	0.294	0.143	0.061	0.245	0.275	0.299	0.051	0.176	0.047	0.127
29	0.329	0.159	0.036	0.287	0.168	0.150	0.053	0.229	0.030	0.119
30	0.434	0.156	0.092	0.157	0.137	0.203	0.042	0.171	0.064	0.118
31	0.892	0.485	0.156	0.836	0.468	0.516	0.206	0.915	0.238	0.355
32	0.345	0.139	0.059	0.426	0.536	0.184	0.067	0.373	0.110	0.201
33	1.444	1.044	0.583	1.487	1.437	0.823	0.891	1.161	0.964	0.988
34	1.409	2.316	1.128	0.851	0.960	0.947	1.207	1.288	0.861	0.748
35	0.182	0.301	0.078	0.205	0.281	0.113	0.037	0.177	0.053	0.074
36	2.730	1.035	0.562	3.603	1.753	1.751	0.593	1.151	0.694	0.780
37	8.585	14.840	6.292	7.560	8.310	13.421	8.744	10.692	10.479	12.375
38	0.534	39.018	0.275	3.106	0.395	0.561	0.251	0.650	0.263	0.451
39	0.292	0.744	0.059	0.324	0.260	0.209	0.118	0.325	0.074	0.135
40	0.452	0.922	0.472	0.718	0.532	0.288	0.121	0.440	0.102	0.182
41	1.889	0.747	0.364	1.841	1.773	4.075	1.256	0.917	0.759	0.359
42	0.964	0.610	0.171	0.730	0.512	0.772	0.375	0.534	0.247	0.266
43	0.777	0.234	0.218	0.428	0.506	0.297	0.144	0.435	0.202	0.126
44	0.397	0.468	0.369	0.553	0.622	0.345	0.330	0.502	0.311	0.360
45	0.303	0.198	0.301	0.234	0.207	0.288	0.141	0.207	0.135	0.120
46	0.280	0.105	0.077	0.241	0.109	0.152	0.043	0.227	0.100	0.072
47	0.269	0.078	0.026	0.113	0.095	0.156	0.026	0.231	0.040	0.059
48	1.064	0.635	0.347	0.480	0.659	0.874	0.109	0.820	0.303	0.405
49	0.680	0.144	0.170	0.265	0.215	0.568	0.120	0.233	0.193	0.116
50	0.197	0.162	0.044	0.153	0.237	0.195	0.058	0.187	0.069	0.099
