# Supplementary material for: Analysis of microRNA expression profiles in exosomes derived from acute myeloid leukemia by p62 knockdown and effect on angiogenesis
Source: PeerJ journal article supplement (doi:10.7717/peerj.13498), 2022-07-22
Supplement: microarray_analysis_raw_data.zip [file GA_single_ch_w_platf(withoutPlatformID).xlsx]

## Sheet: Metadata Template
# Use this template for non-Affymetrix single channel submissions if you used an array not represented in GEO.
# An accompanying matrix table example is included in the second worksheet. Click on the Matrix tab below.
# Most fields in this template must be completed. Incomplete submissions will be returned.
# Field names (in blue on this page) should not be edited. Hover over cells containing field names to view field content guidelines or,
# CLICK HERE for Field Content Guidelines Web page.
# If you are submitting data associated with Copy Number Variation detection, consider submitting your Copy Number Variation calls to dbVar (http://www.ncbi.nlm.nih.gov/dbvar). This will allow users to easily see your results (with links to the raw data) and to view your results in the context of other CNV and structural variation studies. dbVar submission instructions are at http://www.ncbi.nlm.…
SERIES
# This section describes the overall experiment.
title
summary
summary
overall design
contributor
contributor
SAMPLES
# The Sample names in the first column are arbitrary but they must match the column headers of the Matrix table (see next worksheet).
Sample name	title	raw data file	source name	organism	characteristics: Tag	molecule	label	description
SAMPLE 1
SAMPLE 2
SAMPLE 3
SAMPLE 4
SAMPLE 5
SAMPLE 6
SAMPLE 7
SAMPLE 8
SAMPLE 9
SAMPLE X
PROTOCOLS
# This section includes protocols and fields which are common to all Samples.
# Protocols which are applicable to specific Samples or specific channels should be included in additional columns of the SAMPLES section instead.
growth protocol
treatment protocol
extract protocol
label protocol
hyb protocol
scan protocol
data processing
value definition
PLATFORM
# If your array is not deposited in GEO, please include platform annotation columns in your matrix table (see example) and complete the fields below.
title
technology
distribution
organism
manufacturer
manufacture protocol
# Platform Column Definitions: describe the contents of each platform column of the matrix table
header 1	header 1 definition
header 2	header 2 definition
header 3	header 3 definition
etc…

## Sheet: Matrix
# Example of a matrix table for a single channel (non-Affymetrix) submission including platform annotation (header 1-header 3). Only column headers are shown.
# The Matrix table should include normalized (scaled) signal count data.
# Values that should be disregarded may either be left blank or labeled as "null".
ID_REF	header 1	header 2	header 3	SAMPLE 1	SAMPLE 2	SAMPLE 3	SAMPLE 4	SAMPLE 5	SAMPLE 6	SAMPLE 7	SAMPLE 8	SAMPLE 9	SAMPLE X

## Sheet: Metadata Example
# Use this template for non-Affymetrix single channel submissions if you used an array not represented in GEO.
# An accompanying matrix table example is included in the second worksheet. Click on the Matrix tab below.
# Most fields in this template must be completed. Incomplete submissions will be returned.
# Field names (in blue on this page) should not be edited. Hover over cells containing field names to view field content guidelines or,
# CLICK HERE for Field Content Guidelines Web page.
# If you are submitting data associated with Copy Number Variation detection, consider submitting your Copy Number Variation calls to dbVar (http://www.ncbi.nlm.nih.gov/dbvar). This will allow users to easily see your results (with links to the raw data) and to view your results in the context of other CNV and structural variation studies. dbVar submission instructions are at http://www.ncbi.nlm.…
SERIES
# This section describes the overall experiment.
title	miRNA expression profiling and identification of a miRNA regulator for axon guidance in the olfactory bulb of adult mice
summary	Using the highly sensitive miRNA array, we screened 40 microRNAs abundant in the olfactory bulb and we explored the functions of these miRNAs in the olfactory bulb by Gene Ontology and Kyoto Encyclopedia of Genes annotation. The enrichment results indicated that these miRNAs mainly participated in the axon guidance process. Furthermore, the quantitative real-time polymerase chain reaction, immuno…
overall design	In this study, three samples from steady-state mice were used to acquire the miRNA expression profiling and the function of the abudant miRNAs in the olfactory bulb were analyzed by bioinformatic methods,finally, miR-30c was experimentally validated to be a regulator of semaphorin-3A, an important axon guidance cue in the nervous system.
contributor	Ting,T,Sun
contributor	Shu,C,Ling
SAMPLES
# The Sample names in the first column are arbitrary but they must match the column headers of the Matrix table (see next worksheet).
Sample name	title	raw data file	source name	organism	characteristics: Tag	molecule	label	description
N1	olfactory bulb_adult mice_rep1	N1.gpr	Olfactory bulb	Mus musculus	8 weeks old	total RNA	Hy3	Experimental animals were male and commercially-available C57BL/6 mice (SLAC, Shanghai, China).
N2	olfactory bulb_adult mice_rep2	N2.gpr	Olfactory bulb	Mus musculus	8 weeks old	total RNA	Hy3	Experimental animals were male and commercially-available C57BL/6 mice (SLAC, Shanghai, China).
N3	olfactory bulb_adult mice_rep3	N3.gpr	Olfactory bulb	Mus musculus	8 weeks old	total RNA	Hy3	Experimental animals were male and commercially-available C57BL/6 mice (SLAC, Shanghai, China).
PROTOCOLS
# This section includes protocols and fields which are common to all Samples.
# Protocols which are applicable to specific Samples or specific channels should be included in additional columns of the SAMPLES section instead.
growth protocol	All mice were raised in Pathogen-free room and the room was maintained at a constant temperature of 23±1℃ with a 12 h light/dark cycle. Food and water were available ad libitum in the home cages.
treatment protocol	Mice were deeply anesthetized with pentobarbital sodium and then olfactory bulbs were rapidly dissected from the fresh brains.
extract protocol	Total RNA was isolated using TRIzol (Invitrogen) and miRNeasy mini kit (QIAGEN) according to manufacturer’s instructions, which efficiently recovered all RNA species, including miRNAs. RNA quality and quantity was measured by using nanodrop spectrophotometer (ND-1000, Nanodrop Technologies) and RNA Integrity was determined by gel electrophoresis
label protocol	The miRCURY™ Hy3™/Hy5™ Power labeling kit (Exiqon, Vedbaek, Denmark) was used according to the manufacturer’s guideline for miRNA labelling
hyb protocol	The Hy3TM-labeled samples were hybridized on the miRCURYTM LNA Array (v.16.0) (Exiqon) according to array manual
scan protocol	The slides were scanned using the Axon GenePix 4000B microarray scanner (Axon Instruments, Foster City, CA).
data processing	Scanned images were then imported into GenePix Pro 6.0 software (Axon) for grid alignment and data extraction. Replicated miRNAs were averaged and miRNAs that intensities>=50 in all samples were chosen for calculating normalization factor. Expressed data were normalized using the Median normalization. After normalization, differentially expressed miRNAs with statistical significance were identifi…
value definition	Normalized signal intensity
PLATFORM
# If your array is not deposited in GEO, please include platform annotation columns in your matrix table (see example) and complete the fields below.
title	Exiqon miRCURY LNA microRNA array, 6th generation [miRBase v16, condensed Probe_ID version]
technology	spotted oligonucleotide
distribution	custom-commercial
organism	Mus musculus
manufacturer	Exiqon
manufacture protocol	http://www.exiqon.com/ls/Documents/Scientific/miRCURY-LNA-microRNA-Array-6th-gen-hsa-mmu-rno-manual.pdf
# Platform Column Definitions: describe the contents of each platform column of the matrix table
ID_REF	Probe_ID
name	miRNA symbol (Mouse)

## Sheet: Matrix Example
#ID_REF represent the ID in raw data files, truncated example of a matrix table
ID REF	Name	C7	C14
42638	mmu-miR-23a-5p	0.0954673	0.123456
42888	mmu-miR-875-3p	3.25784	2.12459
17278	mmu-miR-719	N/A	N/A
42826	mmu-miR-300-5p	0.658146	0.687264
