# Supplementary material for: Analysis of microRNA expression profiles in exosomes derived from acute myeloid leukemia by p62 knockdown and effect on angiogenesis
Source: PeerJ journal article supplement (doi:10.7717/peerj.13498), 2022-07-22
Supplement: microarray_analysis_raw_data.zip [file matrix.xlsx]

## Sheet: matrix
ID	Name	Cont	Cont_drug	P62	P62_drug
13138	Hy3	1.78896	2.38047	3.24896	3.4084
42638	hsa-miR-23a-5p	0.516234	0.671717	1.10408	1.01513
42888		0.793831	0.503367	0.219817	0.179832
17519	ebv-miR-BART1-3p	N/A	N/A	N/A	N/A
17278		0.913961	2.10269	2.45629	3.11933
46507	hsa-miR-921	0.821429	0.816498	0.616153	0.403361
17928	hsa-miR-181a-2-3p	0.303571	0.388889	0.484596	0.564706
-1		0.818182	0.89899	0.782681	0.766387
17537		2.15747	4.73064	2.70441	2.55798
42722		0.0194805	0.030303	0.0133222	0.0168067
42645		N/A	N/A	N/A	N/A
46636		1.32955	1.13468	0.532889	0.438655
11134	hsa-miR-502-5p	0.0876623	0.111111	1.65529	1.31261
17295		1.4026	1.37037	1.22398	1.03866
32825		0.469156	0.656566	0.977519	1.13109
46276		0.0146104	0.00841751	N/A	N/A
42812	hsa-miR-508-5p	2.36201	1.62458	0.661116	0.494118
42918	hsa-miR-19b-2-5p	N/A	N/A	0.0316403	0.00336134
46457		0.712662	0.900673	1.05912	1.09076
42469		0.144481	0.141414	0.17652	0.146218
27575		3.26786	3.56734	3.43714	3.29412
46481		0.00649351	N/A	N/A	N/A
29001	spike_control_v2_40	0.887987	0.885522	0.756037	0.937815
42516	kshv-miR-K12-12-5p	N/A	N/A	N/A	N/A
46752	hsa-miR-1270	0.452922	0.223906	0.0732723	0.0638655
46807		1.66234	2.35017	1.96003	2.06218
46427	hsa-miR-1248	N/A	0.0117845	N/A	0.00672269
42821		0.811688	0.415825	0.0199833	0.0302521
46279		N/A	N/A	N/A	N/A
11052	hsa-miR-31-5p	4.78409	8.05051	9.12906	13.5462
42696	hsa-miR-943	24.3393	36.5253	21.4688	23.7126
42754	hsa-miR-586	N/A	N/A	N/A	N/A
42632		N/A	0.040404	0.0133222	0.010084
42818	hsa-miR-597-5p	N/A	N/A	N/A	N/A
42810	hsa-miR-149-5p	0.025974	0.127946	0.0516236	0.0672269
42591	hsa-miR-634	1.93182	1.84512	1.74188	1.70924
17585	ebv-miR-BART20-3p	0.0974026	0.0656566	0.108243	0.110924
42848	hsa-miR-1180-3p	N/A	N/A	N/A	N/A
17506	hsa-miR-24-3p	11.6526	17.0976	15.0458	16.3395
42919		7.75	6.07744	5.42714	6.26387
42937		N/A	N/A	N/A	N/A
42795	kshv-miR-K12-3-5p	2.80195	3.58418	2.56953	2.28571
42485	ebv-miR-BART10-5p	0.0957792	0.205387	0.201499	0.210084
11271		0.814935	0.949495	0.962531	0.833613
46633	hsa-miR-1267	1.37825	3.30471	3.17069	4.35462
28684	spike_control_v2_37	0.668831	0.494949	0.629475	0.672269
42896	hsa-miR-450b-5p	0.0714286	0.156566	0.154871	0.25042
42685		N/A	N/A	N/A	N/A
28480	hsa-miR-504-5p	N/A	N/A	N/A	N/A
42681	hsa-miR-1307-3p	N/A	N/A	N/A	N/A
42610	hcmv-miR-UL36-3p	N/A	N/A	N/A	N/A
10919	hsa-miR-103a-3p	5.46916	8.6835	8.77602	12.7395
17388		0.163961	0.183502	0.218152	0.206723
42767		0.342532	0.47138	0.427977	0.581513
11021		N/A	0.003367	N/A	0.00336134
46541	hsa-miR-1225-5p	0.0162338	0.047138	0.0233139	0.0554622
5250	hsa-miR-105-5p	0.0194805	0.0252525	0.00333056	0.0168067
42734	hsa-miR-2110	2.60877	2.39562	2.6045	2.75294
46518		N/A	N/A	0.0266445	0.0235294
42665		0.00162338	0.03367	0.0183181	0.0319328
46923		0.167208	0.306397	0.92423	0.87563
46411	hsa-miR-1203	0.386364	0.178451	0.0133222	0.0117647
46747	hsa-miR-1263	0.0909091	0.0606061	0.0149875	0.0235294
146183		N/A	N/A	N/A	0.00336134
146190	hsa-miR-3927-3p	0.0162338	0.0252525	0.00832639	0.0319328
146013		0.219156	0.136364	0.0899251	0.115966
146061	hsa-miR-1914-3p	0.0194805	0.0218855	N/A	N/A
25557	spike_control_v2_17	2.81656	3.61953	5.09076	4.72101
28568	spike_control_v2_35	0.366883	0.340067	0.366361	0.433613
146060		0.137987	0.0791246	0.511241	0.205042
145658		0.311688	0.388889	0.71607	0.663866
146079		N/A	N/A	N/A	N/A
146199		11.4367	18.6684	15.7885	16.3529
146138	hsa-miR-1909-5p	N/A	0.010101	0.00499584	0.0201681
146177		N/A	N/A	N/A	N/A
146117	hsv1-miR-H6-3p	0.246753	0.208754	0.196503	0.171429
146028		N/A	N/A	N/A	N/A
146212		N/A	N/A	N/A	N/A
146209		23.7727	31.931	36.6311	46.2504
28393	spike_control_v2_32	3.21266	2.95118	4.51957	4.41513
146220		4.28409	4.75084	6.1249	6.27059
10902	hsa_negative_control_7	N/A	N/A	0.2398	0.226891
146055		1.40909	1.54882	2.30974	2.32773
29146	spike_control_v2_43	1.58279	1.10438	2.74604	2.37983
145831	hsa-miR-625-5p	15.1883	21.5926	12.5828	13.0235
145963	hsa-miR-646	N/A	N/A	N/A	N/A
145977	hsa-miR-1247-5p	0.706169	0.727273	0.820983	0.85042
145675	hsa-miR-501-5p	0.423701	0.62963	0.494588	0.757983
145838	hsa-miR-125b-1-3p	6.25649	5.55051	2.1582	1.48403
145953		1.57792	1.56397	1.22065	1.27059
145690	hsa-miR-512-5p	0.237013	0.109428	N/A	N/A
145678	hsa-miR-150-5p	0.261364	0.316498	0.329725	0.332773
145884		5.34578	6.25758	6.79434	7.90924
145715	hsa-miR-648	0.0633117	0.020202	N/A	N/A
147199	hsa-miR-27b-3p	7.01299	10.6599	12.9592	12.9361
147535	hsa-miR-4309	0.978896	0.680135	0.29642	0.277311
147892	hsa-miR-3152-3p	0.0454545	0.0218855	N/A	N/A
147890		0.214286	0.296296	1.10575	0.727731
147611	hsa-miR-4305	0.144481	0.215488	0.154871	0.183193
147934		0.826299	0.695286	0.767694	0.754622
147627	hsa-miR-4294	11.4659	9.34007	13.6953	13.2706
147770	hsa-miR-4276	N/A	N/A	N/A	N/A
147165	hsa-let-7b-5p	45.336	43.0589	93.4505	91.121
147705	hsa-miR-4320	N/A	N/A	N/A	N/A
147848	hsa-miR-466	N/A	N/A	N/A	N/A
147900	hsv2-miR-H6-3p	1.15097	1.11111	0.915903	0.823529
147891	hsa-miR-3175	2.33929	2.50337	3.82348	2.38655
147873		N/A	0.003367	N/A	0.00672269
147186	hsa-miR-200b-3p	7.23214	7.47643	4.62115	5.48739
147844		N/A	N/A	N/A	N/A
147283		0.923701	2.02694	3.25562	3.8084
148231	hsa-miR-3918	0.597403	0.267677	0.0249792	0.0201681
148635	hsa-miR-933	1.91721	1.26936	0.586178	0.334454
148660		N/A	0.0016835	0.231474	0.210084
147660	hsa-miR-4296	N/A	N/A	N/A	N/A
147709	hsa-miR-3185	N/A	0.00673401	N/A	N/A
148251	hsa-miR-3689a-5p/hsa-miR-3689b-5p/hsa-miR-3689e	N/A	N/A	0.00666112	0.00504202
148599	hsa-miR-3680-5p	0.11526	0.220539	0.126561	0.119328
148665	hsa-miR-510-5p	0.0324675	0.013468	N/A	N/A
148363	hsa-miR-3652	0.108766	0.10101	0.123231	0.0941176
147703	hsa-miR-3181	N/A	N/A	N/A	N/A
148062	hsa-miR-3667-3p	0.0795455	0.0808081	0.0832639	0.097479
148206	hsa-miR-3664-5p	0.125	0.158249	0.204829	0.189916
14257	spike_control_v1_i	0.0162338	0.016835	0.143214	0.0638655
0	Empty	N/A	N/A	N/A	N/A
148496		0.162338	0.0723906	N/A	N/A
148322		1.69481	1.62458	1.67694	1.59496
148560		N/A	0.020202	0.166528	0.189916
148185		N/A	0.003367	0.396336	0.248739
148230		4.43019	4.09933	1.35887	1.21513
148444		2.50325	12.665	8.54455	14.2538
148164		0.125	0.141414	0.126561	0.121008
148232		N/A	N/A	N/A	N/A
148350		0.0340909	0.0521886	0.0399667	0.0168067
148090		0.0373377	0.0707071	0.121565	0.132773
148142		N/A	N/A	N/A	N/A
148022		N/A	0.00841751	N/A	N/A
148505		N/A	N/A	N/A	N/A
148152		0.303571	0.442761	0.98418	0.85042
148161		N/A	N/A	N/A	N/A
148513		N/A	N/A	N/A	N/A
148469		N/A	N/A	N/A	N/A
148203		N/A	N/A	N/A	N/A
148477		0.116883	0.191919	0.281432	0.37479
148572		0.767857	0.848485	1.15903	1.18487
148333		0.63961	1.02862	1.57202	1.65042
148391		13.8994	19.3569	11.8701	11.8588
148450		0.0308442	0.0740741	0.0566195	0.0806723
148306	hsa-miR-381-3p	0.112013	0.10101	0.05995	0.0487395
148122		1.75325	1.86027	2.18818	2.15966
148150		0.274351	0.240741	0.294754	0.317647
148120		N/A	N/A	N/A	N/A
146024	hsa-miR-383-5p	N/A	0.010101	0.029975	0.0521008
42659		3.69318	4.25421	3.14571	4.00672
17287		N/A	N/A	N/A	N/A
11234		0.103896	0.124579	0.0616153	0.0857143
30442	hsa-miR-802	N/A	N/A	N/A	N/A
168574	hsa-miR-4428	0.821429	0.594276	0.544546	0.339496
168970	hsa-miR-5590-5p	N/A	N/A	N/A	N/A
168938	hsa-miR-5692a	N/A	N/A	N/A	N/A
168825	hsa-miR-4729	2.02273	1.71717	0.56453	0.485714
168640	hsa-miR-4475	0.582792	0.590909	0.774355	0.803361
168874	hsa-miR-4535	0.0340909	0.0117845	N/A	N/A
168656	hsa-miR-5002-3p	0.831169	0.718855	0.601166	0.642017
168838		0.443182	0.343434	0.216486	0.205042
168861	hsa-miR-4754	0.0584416	0.0656566	0.316403	0.144538
168667	hsa-miR-4999-3p	0.0113636	0.0185185	N/A	0.010084
168910	hsa-miR-4735-5p	0.0827922	0.0791246	0.0982515	0.12437
168664	hsa-miR-5683	N/A	N/A	N/A	N/A
168712		N/A	N/A	N/A	N/A
168766	hsa-miR-4772-5p	0.112013	0.0420875	N/A	N/A
168569	hsa-miR-5088-5p	N/A	0.00841751	0.213156	0.154622
168608		0.137987	0.33165	0.263114	0.645378
168883	hsa-miR-3689d	N/A	N/A	N/A	N/A
168669	hsa-miR-5693	N/A	N/A	N/A	N/A
168791	hsa-miR-4785	0.0340909	0.0151515	N/A	N/A
168804	hsa-miR-4761-3p	N/A	N/A	N/A	N/A
169368	hsa-miR-3529-3p	0.650974	0.73569	0.604496	0.571429
169178	hsa-miR-4665-5p	0.00649351	N/A	N/A	N/A
169221	hsa-miR-4748	1.48701	2.26599	1.73522	1.68067
169076	hsa-miR-345-3p	0.368506	0.515152	0.434638	0.467227
169346	hsa-miR-5195-3p	0.172078	0.102694	N/A	N/A
169031	hsa-miR-4726-5p	21.4594	23.3636	14.2648	13.395
169276	hsa-miR-4474-3p	N/A	N/A	N/A	N/A
169170	hsa-miR-4472	3.30032	9.02189	11.7002	12.4908
169168	hsa-miR-5580-3p	0.366883	0.222222	0.0349709	0.0285714
169335	hsa-miR-4699-5p	1.93994	1.84175	0.619484	0.630252
169043	hsa-miR-4462	0.696429	1.01347	1.29392	0.946218
169136	hsa-miR-5006-3p	0.482143	0.572391	0.80433	0.692437
169243	hsa-miR-3682-5p	0.719156	0.69697	0.676103	0.69916
169205	hsa-miR-4640-3p	2.17857	2.01852	2.30142	2.10588
169078	hsa-miR-548ai/hsa-miR-570-5p	N/A	N/A	N/A	N/A
169130	hsa-miR-4764-3p	1.21104	1.72054	1.62198	1.98992
169358	hsa-miR-4417	0.0925325	0.043771	0.0233139	0.0268908
169278	hsa-miR-4525	N/A	N/A	N/A	N/A
169167	hsa-miR-4451	1.09091	0.759259	0.323064	0.314286
169086	hsa-miR-4786-5p	0.0909091	0.037037	0.218152	0.139496
168937		N/A	0.0016835	N/A	N/A
168555		0.272727	0.747475	2.29642	1.94286
168688		8.0763	9.5	9.26062	10.2622
169250		1.44805	1.37374	1.92007	1.58824
169398	hsa-miR-5096	N/A	N/A	N/A	N/A
169386	hsa-miR-4427	0.194805	0.114478	0.0383014	0.0521008
168607		8.61526	9.3771	6.50458	7.43697
168813		0.0373377	0.030303	N/A	N/A
28019	hsa-miR-10a-3p	1.40909	1.65993	0.664446	0.677311
28191	hsa-miR-30e-5p	9.56494	12.1044	10.418	11.3563
42938		0.12013	0.170034	0.181515	0.205042
42959	hsa-miR-514a-3p	N/A	N/A	0.00333056	0.0117647
17411		0.211039	0.262626	0.576187	0.947899
42678		N/A	N/A	N/A	N/A
46415	hsa-miR-548l	N/A	N/A	N/A	N/A
42877		0.00811688	0.030303	0.0482931	0.0840336
42770		1.09903	0.73064	0.35637	0.253782
46558	hsa-miR-1268a/hsa-miR-1268b	0.00487013	0.0016835	N/A	N/A
42756	hsa-miR-548d-5p	N/A	N/A	0.00166528	0.00168067
42539		56.6721	81.9125	57.1374	63.558
17419	kshv-miR-K12-9-3p	N/A	0.003367	N/A	N/A
11260	hsa-miR-151a-5p	3.64773	3.47138	2.14155	2.20672
31388		1.46916	1.04714	1.02914	0.914286
45985		0.0974026	0.0353535	0.0749376	0.0403361
28346		1.39935	1.03367	0.391341	0.413445
42598	hsa-miR-452-3p	0.220779	0.346801	0.557868	0.660504
31517	hsa-miR-561-3p	N/A	N/A	N/A	N/A
11113	hsa-miR-448	0.0844156	0.047138	N/A	N/A
14313	hsa-miR-499a-5p	N/A	N/A	N/A	N/A
11181	hsa-miR-95-3p	1.07143	0.624579	0.0283097	0.0420168
46510		N/A	N/A	N/A	N/A
17470	kshv-miR-K12-2-5p	0.00324675	N/A	0.0283097	0.0386555
42811	hsa-miR-542-5p	0.256494	0.156566	0.0432973	0.0571429
46796	hsa-miR-1302	N/A	N/A	N/A	N/A
17289	hsa-miR-616-5p	0.0243506	0.0488215	0.0149875	0.0268908
42588		0.326299	0.350168	0.756037	1.04202
11208		0.0584416	0.0454545	0.00499584	0.00672269
46620		109.192	86.0354	102.824	89.4655
10954	hsa-miR-147a	0.224026	0.319865	0.407993	0.6
11251		0.146104	0.37037	1.68526	2.10588
11227		0.0340909	0.040404	0.0266445	0.0420168
46875	hsa-miR-2276-3p	N/A	N/A	N/A	N/A
11018	hsa-miR-218-5p	3.40584	3.21044	3.71857	5.74118
11077	hsa-miR-363-3p	N/A	0.0016835	0.011657	0.0521008
46924	hsa-miR-1252-5p	0.0584416	0.0622896	0.0799334	0.092437
11205		2.66883	3.50842	3.93339	5.41849
46454	hsa-miR-520g-3p	0.0146104	0.016835	N/A	0.00672269
17422		0.675325	0.626263	0.621149	0.605042
17517		0.108766	0.106061	0.128226	0.0151261
46453		0.288961	0.227273	0.314738	0.287395
42444		N/A	N/A	N/A	N/A
42686	hsa-miR-136-3p	0.0941558	0.0420875	N/A	N/A
42558		N/A	N/A	N/A	N/A
17302	hsa-miR-578	N/A	N/A	N/A	N/A
42932	hsa-miR-920	1.09578	0.675084	1.43047	1.04874
17464		0.0730519	0.0791246	2.52123	1.42857
13485	hsa-miR-10a-5p	82.4058	92.5943	97.4338	115.057
46791	hsa-miR-1204	N/A	0.0117845	0.0216486	0.0504202
46976		0.633117	0.624579	0.647794	0.756303
42679		1.40747	1.17172	1.14904	1.13445
46750	hsa-miR-1254	0.121753	0.040404	N/A	N/A
42503		0.00324675	0.0117845	N/A	N/A
46624	hsa-miR-1236-3p	1.51948	1.40909	1.29392	1.40504
46917	hsa-miR-205-5p	2.66234	1.76094	1.93172	2.53613
42769	hsa-let-7b-3p	0.107143	0.141414	0.143214	0.134454
11240	hsa-miR-409-3p	0.0827922	0.0808081	0.619484	0.564706
42964	hsa-miR-7-2-3p	1.86526	2.54545	1.97669	2.75462
46803	hsa-miR-503-5p	N/A	N/A	N/A	N/A
146105	hsa-miR-1539	0.0194805	0.0319865	0.00666112	0.0319328
146077	hsv2-miR-H3	8.15909	7.75421	5.24729	3.81176
27953	spike_control_v2_28	1.25974	1.68687	2.33972	2.2521
146051		N/A	N/A	N/A	N/A
146038		0.667208	0.860269	0.870941	0.828571
146146		2.4026	2.97475	5.58035	9.81849
42838	hsa-miRPlus-C1076	0.508117	0.324916	0.129892	0.110924
30293	spike_control_v2_49	0.769481	0.530303	0.98418	1.1042
145661	SNORD65	0.13474	0.173401	0.699417	0.663866
19605	SNORD6	0.537338	0.316498	0.324729	0.373109
146097		3.41883	3.11785	3.34055	3.31429
46436		9.91396	12.5286	20.1848	24.9395
146039		0.196429	0.136364	0.213156	0.210084
145994		4.5	5.13973	6.27644	6.33782
146050		0.597403	0.62963	0.89259	1.27395
13430	spike_control_v2_10	N/A	N/A	N/A	N/A
42831		5.97727	6.26936	5.93505	6.94958
146124		8.33117	5.95791	2.82598	3.12605
146152	hsa-miR-3179	N/A	N/A	0.129892	0.0890756
145745	hsa-miR-335-3p	0.175325	0.220539	4.18818	3.16639
145679		N/A	N/A	N/A	N/A
145697	hsa-miR-367-5p	N/A	N/A	N/A	N/A
145701	hsa-miR-668-3p	1.53734	1.38889	4.21482	5.47899
145843	hsa-miR-330-5p	N/A	N/A	N/A	N/A
145754	hsa-miR-523-3p	0.0275974	0.0555556	0.0499584	0.0655462
145696	hsa-miR-655-3p	N/A	N/A	N/A	N/A
27968	spike_control_v2_29	0.922078	0.875421	0.982515	1.02185
145638	hsa-miR-29a-5p	0.0211039	0.020202	0.0166528	0.0184874
145741	hsa-miR-545-3p	N/A	N/A	N/A	N/A
146100		2.80032	2.2138	2.33472	2.3479
147827	hsa-miR-3130-3p	N/A	N/A	N/A	N/A
147820	hsa-miR-3133	0.63474	0.723906	0.634471	0.853782
147845	hsa-miR-3173-3p	0.324675	0.73064	0.379684	0.394958
145897	hsa-miR-92b-3p	4.63149	3.80808	5.53705	6.95798
147195	hsa-miR-18a-5p	0.0227273	0.0488215	0.0882598	0.0957983
147203	hsa-miR-302a-3p	0.0633117	0.0319865	0.188177	0.0823529
148008		6.25974	6.70539	6.13655	6.03025
147865	hsa-miR-4330	0.154221	0.0858586	0.0499584	0.0369748
147870	hsa-miR-548s	N/A	N/A	N/A	N/A
147919	kshv-miR-K12-12-3p	2.05682	3.10943	2.4796	1.92941
147754		0.126623	0.127946	0.17652	0.25042
147837	hsa-miR-3119	0.0227273	0.0151515	0.21149	0.221849
147981	hsa-miR-4325	7.25974	8.82155	10.8709	13.4303
147789		0.224026	0.26936	0.704413	0.739496
147562	hsa-miR-4253	0.025974	0.00673401	N/A	N/A
147846	hsa-miR-4313	1.12175	1.22391	1.44047	1.54958
147748	hsv1-miR-H12	N/A	N/A	N/A	N/A
148430	hsa-miR-374c-5p	N/A	N/A	0.00666112	0.00672269
148495	hsa-miR-3915	0.363636	0.424242	0.594505	0.670588
148335	hsa-miR-3606-5p	0.086039	0.047138	0.0482931	0.0369748
148208	hsa-miR-3610	1.05357	1.20539	0.404663	0.398319
148562	hsa-miR-128-1-5p	N/A	N/A	N/A	N/A
147715	hsa-miR-4251	0.237013	0.250842	0.2398	0.22521
148042	hsa-miR-3662	0.136364	0.158249	0.121565	0.127731
148332	hsa-miR-3692-5p	N/A	N/A	N/A	N/A
147334	hsa-miR-3613-5p	N/A	N/A	N/A	N/A
147722	hsa-miR-4306	4.16234	5.1835	4.59284	5.20672
147718	hsv1-miR-H3-5p	0.00974026	0.0117845	0.00499584	0.010084
148642		9.41721	8.36532	9.09575	14.8622
148040	hsa-miR-1247-3p	0.571429	0.314815	0.174854	0.12437
147595	hsa-miR-3178	0.0178571	0.0252525	0.041632	0.0268908
147712	hsv1-miR-H1-5p	0.738636	0.744108	3.39384	2.25882
148170		N/A	N/A	N/A	N/A
148580	hsa-miR-134-3p	N/A	N/A	N/A	N/A
148110		N/A	N/A	N/A	N/A
148538		0.0454545	0.037037	0.0183181	0.0151261
148091		0.0357143	0.020202	N/A	N/A
148016		N/A	N/A	N/A	N/A
148459		0.496753	0.26936	0.0782681	0.0638655
148612		0.0324675	0.0185185	0.0266445	0.0403361
148511		0.0957792	0.0791246	0.118235	0.218487
148453	hsa-miR-3074-5p	0.772727	0.47138	0.29975	0.29916
148212		0.454545	0.351852	0.394671	0.480672
148530		0.298701	0.257576	0.298085	0.369748
148517		N/A	N/A	N/A	N/A
148267		7.93019	7.15825	10.4496	13.3798
148134		0.105519	0.254209	0.331391	0.494118
148389		4.44318	6.97475	11.7469	19.5076
148484		3.05844	2.78956	2.24813	2.87059
148576		0.0243506	0.0656566	0.0849292	0.0319328
148435		4.38636	3.77273	3.42714	3.76303
148329		N/A	N/A	N/A	N/A
148600		0.0292208	0.0286195	0.0466278	0.0907563
148028		0.0730519	0.0673401	0.0865945	0.0655462
148555		N/A	N/A	N/A	N/A
148153		6.12013	4.5202	4.03331	5.23025
148392		N/A	N/A	N/A	N/A
148636		1.37175	1.12963	1.28393	1.32773
148301		N/A	0.023569	0.173189	0.163025
146094	hsa-miR-1911-3p	0.121753	0.124579	0.111574	0.141176
11039		6.4789	4.8367	8.01499	10.2924
46592	hsa-miR-548j-5p	N/A	N/A	N/A	N/A
27565	hsa-miR-423-5p	10.1266	11.1818	10.6961	10.5227
146147		1.89123	2.54714	4.66278	4.91261
168805	hsa-miR-4478	2.22078	2.27609	2.07327	2.61513
168648	hsa-miR-4687-5p	0.717532	0.819865	0.907577	0.929412
46474	hsa-miR-766-5p	0.0308442	0.03367	0.461282	0.411765
168799	hsa-miR-4710	0.319805	0.23569	0.0849292	0.0806723
168591	hsa-miR-4789-3p	N/A	N/A	N/A	N/A
168675	hsa-miR-4433a-3p	1.78571	1.51515	3.34888	2.3479
168885	hsa-miR-5194	0.0227273	0.0286195	0.439634	0.309244
168673	hsa-miR-4656	1.22565	0.843434	0.571191	0.398319
168814	hsa-miR-4463	0.813312	0.757576	0.499584	0.531092
168744	hsa-miR-4746-5p	0.532468	0.414141	0.279767	0.184874
168628	hsa-miR-5695	0.0422078	0.0639731	0.0266445	0.0672269
168742	hsa-miR-4722-3p	0.0535714	0.116162	0.133222	0.164706
168933	hsa-miR-5581-3p	0.147727	0.146465	0.173189	0.194958
168619	hsa-miR-1260b	0.470779	0.43266	0.15154	0.221849
168568	hsa-miR-1290	0.157468	0.203704	0.461282	0.489076
168620	hsa-miR-548au-3p	N/A	N/A	N/A	N/A
168954	hsa-miR-5580-5p	N/A	N/A	0.011657	0.0218487
168811	hsa-miR-1255b-2-3p	0.428571	0.343434	0.294754	0.378151
168801	hsa-miR-4477b	0.131494	0.0824916	0.462948	0.605042
168697	hsa-miR-3189-5p	0.655844	0.745791	0.940883	0.986555
169333	hsa-miR-3194-3p	0.342532	0.257576	0.233139	0.297479
169279	hsa-miR-499b-3p	N/A	N/A	N/A	N/A
169117	hsa-miR-4759	N/A	0.00505051	0.166528	0.216807
169195	hsa-miR-4798-3p	N/A	N/A	N/A	N/A
168988	hsa-miR-4799-5p	N/A	N/A	N/A	N/A
169151	hsa-miR-4526	0.0470779	0.0185185	0.0183181	N/A
169147	hsa-miR-548am-5p/hsa-miR-548au-5p/hsa-miR-548c-5p/hsa-miR-548o-5p	N/A	N/A	N/A	N/A
169174	hsa-miR-4709-5p	0.0113636	0.0151515	N/A	N/A
169241	hsa-miR-5571-3p	1.01299	0.63468	0.193172	0.156303
169211	hsa-miR-5704	0.818182	1.05556	0.771024	0.85042
169188	hsa-miR-4443	4.07143	3.5	2.49792	2.21008
169336	hsa-miR-17-5p	12.586	10.7104	17.3106	24.7193
169354	hsa-miR-4493	0.00487013	0.010101	N/A	0.0117647
169090	hsa-miR-5186	2.24513	1.7037	2.51957	4.18992
169222	hsa-miR-4760-5p	0.0113636	0.0252525	0.0815987	0.0655462
169176	hsa-miR-5587-5p	0.00649351	N/A	N/A	N/A
169353	hsa-miR-5582-3p	N/A	N/A	0.0399667	0.0369748
169193	hsa-miR-4725-5p	0.149351	0.151515	0.15154	0.121008
169317	hsa-miR-3614-5p	0.0551948	0.0319865	N/A	N/A
169032	hsa-miR-4737	N/A	0.010101	N/A	0.00672269
168966		12.6721	13.8737	10.0416	11.1126
168828		3.26461	2.4798	2.26811	2.23866
169190		N/A	0.0117845	0.0149875	0.0302521
168830		0.025974	0.0454545	0.0333056	0.0201681
169175		0.00811688	0.016835	N/A	0.0151261
168845		0.88961	0.582492	0.449625	0.29916
168694		1.24026	1.06061	0.917569	0.994958
168752		0.262987	0.355219	0.414654	0.507563
169412	hsa-miR-1260a	0.155844	0.203704	0.156536	0.178151
17608	hsa-miR-425-5p	0.162338	0.222222	0.492923	0.423529
30787	hsa-miR-125b-5p	5.12825	5.52525	6.10325	5.9479
11159	hsa-miR-518e-3p	0.746753	0.648148	0.323064	0.290756
11218		0.00974026	0.0319865	0.00666112	0.0235294
46572		N/A	N/A	N/A	N/A
42613	ebv-miR-BART19-5p	0.772727	0.863636	0.902581	0.988235
42511		0.0292208	0.0286195	0.00666112	0.0184874
11217		0.926948	1.41751	2.21149	1.87395
46712		N/A	0.0016835	N/A	N/A
17541	ebv-miR-BART1-5p	0.394481	0.414141	0.686095	0.566387
17596		4.69805	4.39226	2.91257	2.71429
28250		0.144481	0.132997	0.0199833	0.0235294
11084	hsa-miR-372-3p	0.00649351	0.0387205	0.0249792	0.0403361
17358	ebv-miR-BART16	0.103896	0.178451	0.204829	0.159664
17312	hsa-miR-592	N/A	N/A	N/A	N/A
11171	hsa-miR-521	0.0292208	0.0555556	0.103247	0.0957983
42803		0.496753	0.530303	0.491257	0.484034
46301	hsa-miR-621	N/A	N/A	N/A	N/A
14289		0.0275974	0.0420875	0.0815987	0.0588235
42524	hsa-miR-21-3p	0.112013	0.26431	0.371357	0.455462
14301	hsa-miR-361-5p	3.01948	3.27778	4.35637	6.8084
46689	hsa-miR-1229-3p	0.0795455	0.136364	0.108243	0.152941
46647	hsa-miR-1324	N/A	N/A	N/A	N/A
23524		0.308442	0.16835	0.00499584	0.0134454
42611		N/A	N/A	N/A	N/A
42970	hsa-miR-744-3p	0.00487013	0.0218855	0.0183181	0.0268908
27740	hsa-miR-574-5p	6.74838	6.94781	11.8868	11.9462
46228		1.05844	1.71549	3.37885	3.32101
11215		N/A	N/A	N/A	N/A
11246		0.467532	0.734007	1.07744	1.15462
17904		1.5	0.863636	1.03747	0.522689
11273		4.5763	9.05387	6.57452	6.78824
19583		1.38961	2	5.52206	4.58824
11141	hsa-miR-509-3p	0.0146104	0.00841751	0.164863	0.0789916
42766	hsa-miR-554	0.00324675	0.00505051	N/A	N/A
17896		2.40097	1.80303	1.80017	1.11933
46501	hsa-miR-1305	0.038961	0.0218855	N/A	N/A
17272	hsa-miR-551a	0.118506	0.208754	0.201499	0.265546
42479		0.100649	0.286195	0.288093	0.416807
42965	hsa-miR-424-5p	N/A	N/A	0.00666112	N/A
42913		0.0957792	0.0892256	0.0682764	0.0621849
42683	hsa-miR-922	0.0194805	0.03367	0.0383014	0.0268908
28450		1.2987	0.978114	0.975853	0.842017
46514		12.4773	16.9327	13.8518	18.4824
42865	hsa-miR-181a-5p	6.76299	11.3973	13.2673	17.3849
42894		0.336039	0.373737	0.421316	0.433613
42667	hsa-miR-302b-5p	0.0681818	0.0353535	0.0399667	0.0252101
10138	hsa-miR-130a-3p	0.323052	0.215488	0.457952	0.321008
30681		0.152597	0.205387	0.114904	0.0806723
30831		N/A	N/A	N/A	N/A
46381	hsa-miR-1298-5p	N/A	N/A	N/A	N/A
42523	hsa-miR-26b-3p	N/A	N/A	N/A	N/A
42892	hsa-miR-450b-3p	N/A	N/A	N/A	N/A
42824	ebv-miR-BART9-5p	0.103896	0.207071	0.158201	0.173109
17606	kshv-miR-K12-4-5p	N/A	N/A	N/A	N/A
42927		6.44643	4.50842	2.36803	2.03193
42861		0.0698052	0.102694	0.134888	0.159664
46925	hsa-miR-1277-3p	N/A	N/A	N/A	N/A
46832	hsa-miR-1202	N/A	N/A	N/A	N/A
42614		N/A	0.0454545	0.502914	0.347899
146064	hsa-miR-718	0.214286	0.30303	0.311407	0.369748
146091	hsa-miR-1914-5p	0.0876623	0.175084	0.198168	0.22521
42780	hsa-miR-1307-5p	0.907468	1.22054	1.43714	1.84874
145866		N/A	N/A	N/A	N/A
46205	SNORD48	1.03409	1.21212	1.84513	1.85378
29138	spike_control_v2_42	0.587662	0.462963	0.900916	0.963025
146192		0.824675	1.17508	1.36553	1.70084
42802		0.183442	0.26936	0.281432	0.27395
145872		N/A	N/A	N/A	N/A
146036		N/A	N/A	N/A	N/A
146017		0.50487	0.326599	0.244796	0.196639
28488	spike_control_v2_34	0.538961	0.786195	1.14238	1.11933
145934	hsa-miRPlus-B1114	2.21753	2.78451	1.04413	0.981513
146020	hsa-miR-449c-3p	0.0535714	0.0420875	0.00166528	0.0117647
28098	spike_control_v2_31	0.186688	0.506734	0.53622	0.586555
14258	hsa_negative_control_1	0.163961	0.0942761	0.0133222	0.0184874
145660		2.26948	3.16835	4.07494	3.60168
145990	ebv-miR-BART21-3p	N/A	N/A	N/A	N/A
146003		0.0551948	0.0673401	0.0383014	0.0336134
145717	hsa-miR-516a-3p/hsa-miR-516b-3p	0.00324675	0.013468	N/A	N/A
145944		14.5276	22.5842	22.0683	25.2
145984	ebv-miR-BART2-3p	0.467532	0.405724	0.259784	0.243697
145760		0.0194805	0.047138	0.0749376	0.117647
146009	hsa-miR-376a-3p	0.0146104	0.03367	0.00999167	0.0302521
145785	hsa-miR-526b-3p	N/A	N/A	N/A	N/A
145641	hsa-miR-369-5p	N/A	N/A	N/A	N/A
145842	hsa-miR-658	N/A	0.016835	0.221482	0.235294
146086	hsa-miR-30a-5p	31.7581	48.6599	44.811	55.1782
145905	hsa-miR-518a-5p/hsa-miR-527	0.701299	0.584175	0.349709	0.30084
147854	hsa-miR-548u	N/A	N/A	N/A	N/A
147835	hsa-miR-3143	N/A	N/A	N/A	N/A
147510		3.00649	4.89057	4.94421	5.08403
147796	hsa-miR-4327	0.527597	0.592593	0.348043	0.364706
147776	hsa-miR-4317	3.07143	5.72222	4.58451	6.13782
147840	hsv2-miR-H9-3p	1.01136	1.23401	1.204	1.17311
147901	kshv-miR-K12-7-5p	N/A	N/A	N/A	N/A
147941	hsa-miR-3160-3p	0.0941558	0.127946	0.178185	0.154622
147767	hsa-miR-4279	1.61039	1.61953	1.91341	1.49076
147832	hsa-miR-4326	0.012987	0.0319865	0.0349709	0.0403361
147851	hsa-miR-3201	2.08929	3.54545	3.38718	3.96471
147706	hsa-miR-4255	10.888	18.1667	9.42714	12.7782
147821	hsa-miR-3169	0.519481	0.907407	0.772689	0.966387
147654	hsa-miR-3138	1.95942	3.02357	2.10325	1.91765
147623	hsa-miR-4304	0.012987	0.00673401	N/A	N/A
147836	hsv2-miR-H7-5p	0.188312	0.345118	0.970858	0.954622
148683	hsa-miR-888-3p	N/A	N/A	N/A	N/A
148467	hsa-miR-3939	N/A	N/A	N/A	N/A
14261	spike_control_v1_a	N/A	N/A	N/A	N/A
147986	hsa-miRPlus-K1303*	0.00487013	N/A	0.00166528	0.00336134
148319		N/A	N/A	0.00333056	0.010084
148387	hsa-miR-3942-5p	N/A	N/A	N/A	N/A
148658		N/A	N/A	N/A	N/A
148004		0.038961	0.0505051	0.00832639	0.0302521
148671		0.324675	0.220539	0.291424	0.189916
148285	hsa-miR-3941	0.417208	0.526936	0.532889	0.788235
148466	hsa-miR-3937	N/A	N/A	N/A	N/A
148682	hsa-miR-483-3p	1.01461	1.17508	1.1607	1.14118
148640	hsa-miR-34b-3p	0.0503247	0.0757576	0.0383014	0.0453782
148327	hsa-miR-3651	N/A	0.0319865	0.0432973	0.0722689
147555	hsv2-miR-H19	N/A	N/A	N/A	N/A
148486		N/A	N/A	N/A	N/A
148279		N/A	N/A	N/A	N/A
148035		1.58117	1.83333	0.894255	0.798319
148158		0.113636	0.0909091	0.144879	0.12437
148611		1	0.861953	0.929226	1.01681
148615		N/A	0.00673401	0.00666112	0.0168067
148012	hsa-miR-203b-3p	0.0227273	0.013468	N/A	N/A
148070		N/A	N/A	N/A	N/A
148582		0.0827922	0.0841751	0.0266445	0.0655462
148528		0.558442	0.569024	0.313072	0.408403
148578		N/A	N/A	0.103247	0.0571429
148130		N/A	N/A	N/A	N/A
148258		1.26948	1.07576	0.446295	0.376471
148283		N/A	N/A	N/A	N/A
148067		N/A	N/A	N/A	N/A
148172	hsa-miR-216a-3p	1.32955	2.56229	2.49292	3.69076
148689		0.0422078	0.10101	0.134888	0.144538
148191		N/A	0.00673401	0.0349709	0.0453782
148094		2.19968	2.98316	2.71607	2.8521
148419		N/A	N/A	N/A	N/A
148503		0.836039	0.86532	0.496253	0.329412
148605		N/A	0.013468	0.00999167	0.0302521
148025		N/A	N/A	N/A	N/A
148661	hsa-miR-486-3p	2.27435	3.17508	3.04413	2.50084
148429		4.82955	9.16667	7.16736	8.45042
148407		N/A	N/A	N/A	N/A
148442		2.16396	2.07912	0.834305	0.778151
42499		2.06169	1.89562	1.9184	1.93277
145759	hsa-miR-181c-3p	N/A	N/A	0.0449625	0.0470588
17835	hsa-miR-450a-5p	0.0535714	0.0791246	0.243131	0.242017
42732	hsa-miR-532-3p	0.100649	0.173401	0.163197	0.183193
145734	hsa-miR-33b-3p	N/A	N/A	N/A	N/A
42493	hsa-miR-892b	N/A	N/A	N/A	N/A
168878	hsa-miR-5100	0.943182	1.05556	0.772689	0.979832
168605	hsa-miR-4653-3p	0.11526	0.200337	0.696087	0.714286
168856	hsa-miR-4494	N/A	N/A	N/A	N/A
168558	hsa-miR-5585-3p	0.113636	0.0942761	0.1199	0.0453782
168700	hsa-miR-5696	0.12013	0.153199	0.138218	0.136134
168829	hsa-miR-4794	N/A	N/A	N/A	N/A
168602	hsa-miR-4666a-3p	0.133117	0.407407	0.341382	0.30084
168894	hsa-miR-3978	N/A	N/A	N/A	N/A
168918	hsa-miR-4491	0.0194805	0.0353535	0.253122	0.233613
168704	hsa-miR-506-5p	0.0178571	0.043771	0.134888	0.117647
168708	hsa-miR-296-5p	3.14448	2.74074	2.9642	2.91429
168621	hsa-miR-4796-5p	0.123377	0.291246	0.314738	0.398319
168670	hsa-miR-4694-5p	N/A	0.0117845	0.0366361	0.0571429
168767	hsa-miR-4681	N/A	N/A	N/A	N/A
168594	hsa-miR-3150b-5p	1.42208	1.51347	1.72856	1.90084
168844	hsa-miR-4532	12.5795	16.8653	6.3547	6.73782
168975	hsa-miR-4528	N/A	N/A	0.0932556	0.0403361
168570	hsa-miR-2682-3p	0.142857	0.138047	0.156536	0.2
168649	hsa-miR-3129-3p	N/A	N/A	N/A	N/A
168786	hsa-miR-3618	N/A	N/A	N/A	N/A
169074	hsa-miR-3972	0.779221	0.818182	0.844296	0.887395
169106	hsa-miR-4783-3p	0.292208	0.195286	0.0666112	0.0369748
169071	hsa-miR-4639-5p	0.0422078	0.0589226	0.0516236	0.0840336
168984	hsa-miR-4637	N/A	N/A	N/A	N/A
169265	hsa-miR-4733-3p	0.152597	0.491582	0.577852	0.737815
169099	hsa-miR-4790-3p	N/A	N/A	N/A	N/A
169201	hsa-miR-5047	N/A	N/A	N/A	N/A
169132	hsa-miR-382-3p	0.0324675	0.0639731	0.417985	0.331092
169122	hsa-miR-5687	N/A	N/A	N/A	N/A
169227	hsa-miR-3064-5p	N/A	0.00673401	0.0199833	0.00504202
169289	hsa-miR-4692	0.678571	0.848485	1.66528	0.791597
169308	hsa-miR-4503	0.0795455	0.127946	0.865945	0.905882
169172	hsa-miR-4445-3p	0.355519	0.388889	0.424646	0.393277
169199	hsa-miR-4518	0.025974	0.023569	0.196503	0.119328
169034	hsa-miR-642b-5p	2.40747	2.14983	1.78018	1.6084
169173	hsa-miR-5590-3p	0.0470779	0.0791246	0.0566195	0.0689076
169231	hsa-miR-4766-3p	0.0275974	0.023569	0.0882598	0.0823529
169315	hsa-miR-4676-3p	N/A	N/A	N/A	N/A
169005	hsa-miR-520b/hsa-miR-520c-3p	N/A	N/A	N/A	N/A
168580		0.465909	0.373737	0.566195	0.517647
169246		0.336039	0.340067	0.358035	0.285714
169291		0.780844	0.720539	0.138218	0.151261
168888		N/A	N/A	N/A	N/A
169416	hsa-miRPlus-A1086	N/A	N/A	0.391341	0.211765
168913		0.214286	0.0976431	0.298085	0.0537815
169051		0.521104	0.632997	1.16903	0.907563
168604		0.00324675	0.0319865	0.0499584	0.0655462
28161		0.0178571	0.013468	N/A	N/A
13170	hsa-miR-380-5p	N/A	N/A	N/A	N/A
42958		1.78571	1.79293	2.52623	1.42353
46324	hsa-miR-320b	5.02922	7.66498	8.22315	7.44874
17433		0.282468	0.161616	0.206495	0.159664
11202		0.0698052	0.0606061	0.0249792	0.0638655
42939		3.48214	6.99327	5.39883	8.47059
17676	hsa-miR-152-3p	1.01623	1.58081	1.55537	1.8
17593	hsa-miR-650	0.0698052	0.047138	0.00832639	0.0151261
46483	hsa-miR-27a-3p	6.53571	8.74411	8.28809	7.96639
46438	hsa-let-7g-5p	49.461	76.3114	72.2415	75.1714
42703	hsa-miR-490-3p	1.24838	0.705387	0.721066	0.430252
28054		0.0162338	0.023569	0.0366361	0.0386555
14302		N/A	N/A	N/A	0.00672269
17625	hsa-miR-627-5p	0.201299	0.193603	0.17652	0.112605
27568	hsa-miR-744-5p	3.17208	3.60101	5.41382	7.59664
42478	hsa-miR-593-5p	0.00324675	N/A	N/A	N/A
42457	hsa-miR-323a-5p	N/A	N/A	0.0316403	0.0352941
17589	ebv-miR-BART3-3p	N/A	N/A	N/A	N/A
42832	hsa-miR-638	0.857143	0.979798	1.13739	0.884034
42712		N/A	N/A	N/A	N/A
42748		N/A	N/A	N/A	N/A
42807		0.173701	0.0757576	0.00666112	0.0168067
46462	hsa-miR-1224-5p	0.025974	0.013468	N/A	N/A
46822	hsa-miR-1178-3p	0.11039	0.106061	0.124896	0.097479
28759	hsa-miR-758-3p	N/A	N/A	N/A	N/A
17527		0.038961	0.03367	0.00666112	0.0235294
42496	hsa-miR-181c-5p	0.0243506	0.10101	0.136553	0.12605
10306	hsa-miR-146b-5p	34.2906	44.3973	49.3405	56.4941
46982		N/A	0.00673401	N/A	N/A
46538		0.358766	0.585859	0.497918	0.697479
17882	hsa-miR-20b-3p	0.344156	0.218855	0.0799334	0.0907563
42765		0.86039	0.609428	0.769359	0.159664
46921		1.31656	2.58249	3.48876	3.9395
27551	hsa-miR-612	0.228896	0.104377	0.80766	0.156303
42481		0.196429	0.114478	0.0832639	0.087395
42864		0.149351	0.333333	0.218152	0.27395
42504	hsa-miR-593-3p	0.62013	0.70202	0.537885	0.551261
42897	ebv-miR-BART15	0.0649351	0.149832	0.129892	0.25042
42874	hsa-miR-16-2-3p	N/A	N/A	N/A	0.00336134
42742		N/A	N/A	N/A	0.00336134
17490	hsa-miR-571	0.00974026	0.00841751	N/A	N/A
46565	hsa-miR-1207-5p	0.662338	0.441077	0.111574	0.0621849
15619	hsa-miR-649	0.180195	0.0909091	N/A	N/A
10943	hsa-miR-136-5p	0.0308442	0.0488215	0.00832639	0.0487395
42706		0.875	0.66835	0.364696	0.351261
10977	hsa-miR-183-5p	41.0065	64.7778	43.7652	48.3361
42530	hsa-let-7a-2-3p	0.0113636	0.0218855	0.0249792	0.0319328
42569		N/A	0.023569	0.123231	0.112605
46639		1.22078	1.5101	1.39384	1.19328
10990	hsa-miR-196a-5p	3.75325	7.97643	8.27644	7.63529
14285	hsa-miR-487b-3p	0.12013	0.0538721	0.0999167	0.0890756
27546	hsa-miR-380-3p	0.0162338	0.0740741	0.169858	0.152941
31026	hsa-miR-101-3p	3.12338	4.81313	5.06911	6.23697
11040	hsa-miR-29b-3p	0.873377	1.13131	1.06078	1.02353
13130	hsa-miR-517-5p	0.88961	0.503367	0.174854	0.154622
46461		0.125	0.119529	0.0849292	0.0588235
11138	hsa-miR-506-3p	0.121753	0.117845	0.0749376	0.0857143
46293		0.0146104	0.003367	N/A	N/A
28547		0.574675	0.348485	0.201499	0.181513
146101		0.36039	0.353535	0.439634	0.440336
145998		0.00487013	0.00505051	0.0366361	0.0352941
146118		0.410714	0.53367	0.56786	0.564706
146045	hsv2-miR-H4-5p	N/A	0.0505051	1.21732	0.620168
13146		N/A	0.00505051	N/A	N/A
145987	hsa-miR-2054	N/A	N/A	N/A	N/A
146111	hsa-miR-767-5p	0.818182	0.705387	0.481266	0.815126
145933	hsa-miR-652-5p	0.430195	0.387205	0.188177	0.168067
146058	hsv1-miR-H3-3p	7.11039	5.96465	6.27977	4.0084
145666	SNORD110	1.25974	1.33838	1.35054	1.39832
146206		4.73052	7.30976	7.61032	9.26891
146026		0.238636	0.106061	0.00999167	0.0151261
146098	hsv1-miR-H5-3p	2.19968	3.867	2.9975	3.1395
146004		0.61039	0.956229	1.04246	1.3479
146161	hsa-miR-2115-3p	9.75974	10.8098	6.25312	5.04202
146168	hsa-miR-1912	0.099026	0.040404	N/A	N/A
146133		0.155844	0.227273	0.196503	0.203361
146090	hsv1-miR-H7-3p	1	1.07239	1.16236	1.15126
29837	spike_control_v2_46	0.136364	0.143098	0.17652	0.216807
145870		N/A	N/A	N/A	N/A
145736	hsa-miR-605-5p	0.0487013	0.0892256	0.702748	0.552941
145721	hsa-miR-875-5p	N/A	N/A	N/A	N/A
145693	hsa-miR-92a-3p	14.3198	14.5976	14.1465	15.8403
145962	hsa-miR-639	0.892857	0.496633	0.101582	0.10084
145705	hsa-miR-431-5p	8.41396	17.133	8.49625	12.5462
145878		0.0227273	0.183502	0.111574	0.268908
145727	hsa-miR-501-3p	N/A	0.047138	0.0549542	0.107563
145637	hsa-miR-187-3p	0.784091	1.29293	0.982515	1.02017
145748	hsa-miR-518f-3p	N/A	N/A	N/A	N/A
145917		15.1997	18.6818	13.965	16.8252
147193	hsa-miR-572	N/A	N/A	N/A	N/A
147608	hsa-miR-4307	0.112013	0.286195	0.226478	0.32605
147872	hsv2-miR-H13	0.0779221	0.0420875	0.0982515	0.0386555
147938	hsa-miR-4287	0.233766	0.161616	0.0815987	0.087395
147814	hsa-miR-3159	N/A	N/A	N/A	N/A
147807		5.38312	10.2879	6.93755	7.77311
147924		0.180195	0.0656566	0.0133222	0.010084
147760	hsa-miR-4316	N/A	N/A	N/A	N/A
147544	hsa-miR-4314	0.331169	0.306397	0.168193	0.097479
147791		0.506494	0.506734	0.368027	0.421849
147810		0.0925325	0.0505051	0.0499584	0.0386555
147737		1.59416	1.66835	1.55204	1.51429
147830	hsv1-miR-H18	0.459416	0.220539	0.0366361	0.0436975
147671	hsa-miR-4323	1.08929	1.05724	1.19234	1.31597
147802		43.0909	42.9394	38.3897	36.7681
147897	hsa-miR-3136-5p	N/A	N/A	N/A	N/A
147698	hsv2-miR-H22	0.00974026	N/A	N/A	N/A
148627	hsa-miR-615-5p	0.0568182	0.183502	0.261449	0.314286
148669	hsa-miR-185-3p	0.102273	0.026936	0.0233139	0.0168067
148687	hsa-miR-1908-5p	3.7711	4.98485	3.74188	3.10756
10905	spike_control_v1_g	N/A	N/A	N/A	N/A
148234	hsa-miR-3667-5p	0.300325	0.326599	0.782681	0.682353
148677	hsa-miR-637	0.329545	0.119529	N/A	N/A
148654	hsa-miR-184	0.160714	0.131313	0.251457	0.171429
148079		0.0633117	0.181818	1.10908	0.45042
148474	hsa-miR-3622a-5p	0.446429	0.1633	0.0166528	0.0168067
148625	hsa-miR-941	3.31169	4.59596	3.87843	4.48908
147640	kshv-miR-K12-10a-5p	0.157468	0.149832	0.101582	0.0705882
147599		0.00324675	0.013468	0.0133222	0.010084
147318	hsa-miR-3660	2.02922	1.45791	0.739384	0.631933
147666	hsa-miR-4277	0.0178571	0.0151515	N/A	N/A
148186		N/A	N/A	N/A	0.00336134
148021		0.206169	0.247475	0.339717	0.29916
148131		0.464286	0.457912	0.657785	0.663866
148573		N/A	N/A	N/A	N/A
148569		0.154221	0.203704	0.829309	0.67563
148137		N/A	N/A	N/A	N/A
148359		2.34578	3.19024	3.30558	3.12773
148315		5.32955	5.93603	4.2831	4.13613
148044		7.22565	11.7912	4.85928	4.51597
148431		0.0568182	0.047138	N/A	N/A
148056		0.126623	0.212121	0.311407	0.168067
148653		2.93506	3.6734	1.94505	1.69244
148367		N/A	N/A	N/A	N/A
148475		N/A	N/A	N/A	N/A
148112		N/A	N/A	N/A	N/A
148181	hsa-miR-203b-5p	0.386364	0.464646	0.571191	0.515966
148076		1.29058	0.856902	0.661116	0.445378
148457		N/A	N/A	N/A	N/A
148060		N/A	0.0218855	0.00999167	0.0352941
148464		N/A	N/A	N/A	N/A
148141		N/A	N/A	N/A	N/A
148194		N/A	N/A	N/A	N/A
148646		0.819805	0.900673	0.945878	0.880672
148386	hsa-miR-219b-5p	14.9984	18.4764	16.7527	20.3513
148520		1.25812	2.76936	4.75437	4.92605
148284	hsa-miR-208b-3p	0.0340909	0.0387205	0.0799334	0.0554622
148537		0.293831	0.1633	0.00333056	0.0151261
11255		N/A	N/A	N/A	N/A
42962		0.548701	0.457912	0.427977	0.327731
29650		0.787338	0.385522	0.174854	0.122689
11164	hsa-miR-519e-3p	N/A	N/A	N/A	N/A
17886	hsa-miR-301b-3p	0.0275974	0.193603	0.0999167	0.188235
168684	hsa-miR-5010-5p	0.160714	0.112795	0.0766028	0.0436975
168679	hsa-miR-4763-3p	0.592532	0.272727	0.0815987	0.0621849
168718	hsa-miR-4684-3p	0.196429	0.0942761	0.0449625	0.0218487
168945	hsa-miR-326	0.012987	0.0185185	0.0216486	0.0252101
168964	hsa-miR-4450	0.331169	0.37037	0.691091	0.537815
168932	hsa-miR-5094	0.720779	0.550505	0.632806	0.489076
168934	hsa-miR-4999-5p	N/A	0.0117845	0.0133222	0.0151261
168600		4.90422	6.32323	12.2748	11.3479
168726		0.832792	1.01515	1.27727	1.1479
168795	hsa-miR-4706	1.32955	1.82155	1.75187	1.22857
168755	hsa-miR-4479	0.25974	0.117845	N/A	0.00336134
168577		0.391234	0.274411	0.159867	0.139496
168827	hsa-miR-548ac	N/A	N/A	N/A	N/A
168676	hsa-miR-499b-5p	0.0827922	0.139731	0.178185	0.216807
168852	hsa-miR-4764-5p	5.68506	11.2879	6.42465	7.4
168611	hsa-miR-4753-3p	0.108766	0.232323	0.136553	0.157983
168572	hsa-miR-4507	2.76623	1.45118	1.50375	0.626891
168743	hsa-miR-548ad-3p	2.90584	4.2138	2.41965	2.65714
168647		5.29221	8.98653	10.3214	9.6437
168812	hsa-miR-875-3p	N/A	N/A	N/A	N/A
169186	hsa-miR-4520-3p	0.00974026	0.03367	0.0266445	0.0235294
169118	hsa-miR-5009-3p	1.25162	0.848485	0.261449	0.193277
169320	hsa-miR-4468	0.946429	1.88384	2.86095	1.99496
169321	hsa-miR-4691-3p	0.375	0.289562	0.466278	0.426891
169070	hsa-miR-4695-3p	0.285714	0.483165	0.421316	0.460504
169113	hsa-miR-4755-5p	0.975649	1.10774	1.13739	0.919328
169182	hsa-miR-4728-3p	0.387987	0.407407	0.467943	0.406723
169036	hsa-miR-4745-3p	N/A	N/A	N/A	N/A
169230	hsa-miR-4747-3p	0.0941558	0.154882	0.188177	0.186555
169157	hsa-miR-4755-3p	N/A	N/A	0.0133222	0.0386555
169000	hsa-miR-5707	N/A	N/A	N/A	N/A
169319	hsa-miR-3136-3p	0.719156	0.856902	0.784346	0.747899
168996	hsa-miR-4524a-3p	0.0178571	0.026936	N/A	N/A
169064	hsa-miR-4778-3p	0.142857	0.1633	0.0932556	0.0840336
169112	hsa-miR-4727-3p	0.13961	0.0673401	N/A	N/A
169169	hsa-miR-5684	0.691558	0.617845	0.825978	0.378151
168987	hsa-miR-4523	0.350649	0.23064	0.0566195	0.0453782
169365	hsa-miR-3974	0.0113636	0.0185185	0.0316403	0.0605042
169160	hsa-miR-4633-3p	N/A	N/A	N/A	N/A
168992	hsa-miR-5092	N/A	N/A	N/A	N/A
168654		N/A	N/A	0.011657	0.0252101
168713		0.0227273	0.0959596	1.19567	0.737815
168957		N/A	N/A	N/A	N/A
168706		3.98864	7.39562	1.602	1.87899
168761		0.202922	0.407407	0.391341	0.421849
168842		0.327922	0.23569	0.188177	0.34958
169268		1.20942	0.981481	0.38801	0.302521
168936		1.22565	1.3165	0.939217	0.994958
46839		0.626623	0.360269	0.121565	0.087395
28769		N/A	N/A	N/A	N/A
42664		N/A	N/A	N/A	0.0134454
46340	hsa-miR-1289	N/A	N/A	N/A	N/A
46627	hsa-miR-1271-5p	N/A	N/A	N/A	N/A
42750	hsa-miR-636	24.1997	21.3586	24.8127	27.6504
42717	hsa-miR-92b-5p	0.24513	0.26431	3.01249	1.28908
11045	hsa-miR-302c-5p	1.59578	2.05724	1.82015	1.51597
11274		N/A	N/A	N/A	N/A
42640	hsa-miR-20b-5p	2.63312	2.57407	3.49709	5.31597
17562	ebv-miR-BHRF1-2-5p	N/A	N/A	N/A	N/A
14189		0.25487	0.159933	0.0632806	0.0487395
10937	hsa-miR-132-3p	0.107143	0.117845	0.154871	0.134454
32731	hsa-miR-190b	0.00324675	0.0151515	0.05995	0.0638655
46239		0.199675	0.215488	0.224813	0.213445
17359	ebv-miR-BART4-5p	N/A	N/A	0.0183181	0.00168067
19016	hsa-miR-217	0.0357143	0.010101	N/A	N/A
46684	hsa-miR-1225-3p	0.337662	0.392256	0.436303	0.492437
46531	hsa-miR-1231	0.0162338	0.00673401	N/A	N/A
17571	kshv-miR-K12-11-3p	N/A	N/A	N/A	N/A
11268		0.185065	0.131313	0.121565	0.0773109
17691		N/A	N/A	N/A	N/A
46556	hsa-miR-623	0.287338	0.0875421	N/A	N/A
27838	hsa-miR-302d-3p	N/A	N/A	N/A	N/A
42700	hsa-miR-631	N/A	N/A	N/A	N/A
46879		0.0487013	0.047138	0.243131	0.196639
17508	hcmv-miR-UL112-3p	0.326299	0.284512	0.303081	0.282353
42778	hsa-let-7g-3p	N/A	N/A	N/A	N/A
42536		N/A	N/A	N/A	N/A
46835		0.0308442	0.0673401	0.00499584	0.0285714
17463	hsa-miR-151a-3p	1.53571	1.27104	3.95171	4.39832
46944	hsa-miR-1297	10.8945	14.1616	13.5537	19.8235
46860	hsa-miR-1205	N/A	N/A	N/A	N/A
42862		N/A	0.003367	0.379684	0.315966
42822		N/A	0.0151515	0.00499584	0.0134454
46661	hsa-miR-1294	N/A	N/A	N/A	N/A
42541	hsa-miR-302a-5p	0.0600649	0.0454545	0.0432973	0.0504202
17749		57.5828	42.3266	76.7094	100.95
46787		N/A	N/A	N/A	N/A
27540		10.3815	14.8788	11.4555	13.8588
11058	hsa-miR-325	0.0324675	0.0757576	0.209825	0.292437
46422		N/A	0.0151515	0.011657	0.0117647
42744	hsa-miR-23a-3p	15.737	12.3266	21.6986	24.7731
33163		1.00162	0.962963	1.77352	2.34622
14271	hsa-miR-539-5p	N/A	N/A	N/A	N/A
42971	hsa-miR-96-3p	N/A	N/A	N/A	N/A
42502	hsa-miR-204-3p	11.3864	19.1111	10.9925	9.76639
29872	hsa-miR-340-5p	1.95455	1.86027	3.06411	4.43025
46744	hsa-miR-526b-5p	0.470779	0.173401	0.011657	0.00840336
17540		N/A	0.0117845	0.00499584	0.0117647
11074	hsa-miR-34c-5p	N/A	0.003367	0.00333056	0.00840336
46416	hsa-miR-1293	0.323052	0.3367	0.401332	0.369748
46789	hsa-miR-513b-5p	0.0600649	0.212121	0.05995	0.0386555
4390		1.87013	1.69192	1.77352	1.15798
42787		0.266234	0.237374	0.224813	0.203361
46331		0.0178571	0.0639731	0.0882598	0.0840336
42522	ebv-miR-BART19-3p	0.202922	0.144781	0.173189	0.0806723
17528		N/A	N/A	N/A	N/A
46622	hsa-miR-518f-5p	0.641234	0.388889	0.1199	0.087395
17612	hsa-miR-555	N/A	N/A	N/A	N/A
46616		N/A	N/A	N/A	N/A
146075		0.0292208	0.037037	0.0432973	0.0369748
146181		N/A	N/A	N/A	N/A
146145		1.83279	1.8266	2.62948	2.54118
24226	spike_control_v2_16	0.49513	0.393939	0.667777	0.741176
146150		0.086039	0.104377	0.11657	0.137815
42650		24.1526	23.3451	37.8185	43.9882
10991		1.3961	1.72391	2.48127	2.90252
146005	hsa-miR-3129-5p	0.0600649	0.0740741	0.164863	0.161345
146128		0.292208	0.346801	0.414654	0.418487
146007		0.116883	0.043771	0.00666112	0.00168067
145659	RNU1	1.6039	1.10943	4.0816	4.71261
17858	hsa-miRPlus-A1073	1.41071	1.36532	1.72523	1.78487
146085	hsa-miR-3170	0.0909091	0.0572391	0.301415	0.231933
146188		2.01786	2.12121	1.75354	2.33277
146170		0.00974026	0.00841751	0.0849292	0.0756303
146082		0.337662	0.121212	0.0349709	0.0151261
46435		149.417	133.094	172.43	183.124
146218		1.89123	1.4596	1.51707	1.17647
146116	hsa-miR-2116-3p	2.00649	2.32323	1.80683	2.27059
145980	hsa-miR-939-5p	0.0746753	0.023569	N/A	N/A
145973	hsa-miR-664a-3p	2.07143	2.06566	2.09492	2.14622
145965	hsa-miR-518d-3p	0.246753	0.208754	0.131557	0.129412
145687	hsa-miR-384	N/A	N/A	N/A	N/A
145651	hsa-miR-99a-3p	N/A	N/A	N/A	N/A
145677	hsa-miR-139-5p	0.836039	1.07071	1.92506	2.97647
145633	hsa-let-7d-3p	0.108766	0.139731	0.158201	0.168067
146008	hsa-miR-26b-5p	12.8149	16.0253	17.4654	21.2319
145720		N/A	N/A	N/A	N/A
145643	hsa-miR-382-5p	0.685065	0.685185	1.98501	2.66218
147539		N/A	N/A	N/A	N/A
147861		1.25649	1.38384	1.4388	1.31429
147910		0.0746753	0.102694	0.517902	0.228571
147864	hsv2-miR-H24	2.9026	2.58418	2.9592	2.87731
147895	kshv-miR-K12-2-3p	0.0194805	0.0117845	N/A	N/A
147953	hsa-miR-491-5p	0.0600649	0.0555556	0.0965862	0.0739496
147817	hsa-miR-3196	0.761364	0.545455	0.729392	0.47395
147831	kshv-miR-K12-1-3p	N/A	N/A	N/A	N/A
147629		12.4042	11.2559	11.3056	10.2269
147898	hsa-miR-2861	0.00324675	0.00841751	N/A	N/A
147833		N/A	N/A	N/A	N/A
147743	hsa-miR-4275	0.00487013	0.0117845	0.0133222	0.0218487
147799	hsa-miR-3156-5p	3.04545	2.13131	2.42631	1.78655
147763	hsa-miR-4272	N/A	N/A	N/A	N/A
147921	hsa-miR-3131	0.0113636	0.00841751	0.0815987	0.0453782
148002		0.00974026	0.013468	0.106578	0.0722689
148593	hsa-miR-3605-3p	N/A	N/A	N/A	0.010084
147625		N/A	N/A	N/A	N/A
148058	hsa-miR-3672	N/A	N/A	N/A	N/A
148420	hsa-miR-3607-3p	N/A	N/A	0.341382	0.186555
148434	hsa-miR-3692-3p	0.185065	0.23064	0.251457	0.52605
14264	spike_control_v1_c	N/A	N/A	N/A	N/A
148063	hsa-miR-3713	N/A	N/A	N/A	N/A
148679		0.417208	0.37037	0.384679	0.381513
148382	hsa-miR-3609	N/A	N/A	0.276436	0.164706
148465	hsa-miR-3611	1	0.915825	1.24896	1.62521
147589	hsa-miR-1193	N/A	N/A	N/A	N/A
147621	hsa-miR-4278	0.0211039	0.0555556	0.05995	0.0621849
147633	hsa-miR-3163	0.0698052	0.0673401	0.0582848	0.0403361
147957	hsa-miR-412-5p	N/A	N/A	N/A	N/A
148380	hsa-miR-3913-5p	0.0113636	0.0185185	N/A	0.00168067
148080	hsa-miR-3921	2.53571	1.90236	2.09492	1.74118
148403		N/A	0.010101	0.0216486	0.0369748
148595	hsa-miR-34a-3p	N/A	N/A	N/A	N/A
148581		1.13312	0.826599	0.532889	0.455462
148292		0.00649351	0.0117845	N/A	N/A
148480	hsa-miR-494-5p	4.57792	3.49495	2.89759	3.04034
148373		0.430195	0.166667	0.0432973	0.0302521
148089	hsa-miR-208a-3p	0.157468	0.106061	0.216486	0.146218
148174		N/A	N/A	N/A	N/A
148213		N/A	N/A	N/A	N/A
148545		N/A	N/A	N/A	N/A
148271		0.237013	0.252525	0.324729	0.322689
148342		0.168831	0.127946	0.298085	0.265546
148053		0.0535714	0.020202	0.0499584	0.0302521
148297		1.8539	1.55724	4.26644	8.27563
148075		0.0649351	0.0774411	0.21149	0.22521
148175		0.0146104	0.016835	0.0432973	0.0252101
148083		0.188312	0.164983	0.21149	0.285714
148337		0.0308442	0.119529	0.339717	0.378151
148633		3.88799	4.1835	3.40883	3.90756
148564		0.746753	0.87037	1.03081	1.16807
148066		0.00487013	0.0117845	0.00999167	0.0319328
148294		1.16071	1.11111	0.889259	0.87563
148119		0.0844156	0.0505051	0.00499584	0.0268908
148468		9.13149	8.92424	7.53872	9.49244
148215	hsa-miR-3591-3p	0.814935	0.968013	1.31724	1.68067
148570		0.202922	0.1633	0.204829	0.295798
148395		0.350649	0.249158	0.209825	0.287395
19599		1.94318	2.0303	3.07577	3.41176
13132	hsa-miR-519e-5p	70.888	87.5943	65.4172	61.9513
46491		N/A	0.010101	N/A	0.00504202
32711	hsa-miR-633	N/A	N/A	N/A	N/A
42629	hsa-miR-376c-3p	0.272727	0.321549	0.198168	0.171429
168734	hsa-miR-4465	N/A	N/A	N/A	N/A
46863	hsa-miR-3157-3p	0.0698052	0.200337	0.318068	0.317647
168730	hsa-miR-4464	N/A	N/A	0.0216486	0.0201681
168644	hsa-miR-4775	N/A	0.043771	0.121565	0.157983
168770	hsa-miR-4699-3p	4.10227	3.66498	3.49542	3.39328
168890	hsa-miR-1306-5p	0.826299	0.986532	1.16903	1.16303
168877	hsa-miR-5583-5p	0.00811688	0.0420875	0.0432973	0.0369748
168618	hsa-miR-4783-5p	0.00324675	0.0286195	0.0249792	0.0302521
168855	hsa-miR-4675	N/A	N/A	N/A	N/A
168919	hsa-miR-4456	4.28734	10.803	11.4371	15.4756
168560	hsa-miR-4676-5p	0.0487013	0.023569	0.0366361	0.0420168
168963	hsa-miR-664b-5p	0.537338	0.530303	0.422981	0.361345
168671	hsa-miR-3140-5p	N/A	N/A	0.0749376	0.0453782
168745	hsa-miR-4667-3p	1.96591	2.07912	2.38801	2.36471
168668	hsa-miR-4732-3p	1.17532	1.32323	1.50042	1.31765
168839	hsa-miR-4774-3p	N/A	N/A	N/A	N/A
168917	hsa-miR-4511	0.103896	0.0993266	0.0199833	0.0403361
168661	hsa-miR-4531	10.7192	10.0202	11.8102	7.31597
168776	hsa-miR-4795-3p	2.99026	4.46465	2.95254	4.11429
168576	hsa-miR-4693-3p	2.32792	2.72896	3.75687	2.72941
169098	hsa-miR-3691-3p	N/A	N/A	N/A	N/A
169107	hsa-miR-4782-5p	0.0503247	0.0488215	0.0466278	0.0352941
169272	hsa-miR-4419b	0.186688	0.16835	1.20899	0.692437
169159	hsa-miR-4521	1.20617	0.841751	0.444629	0.359664
169242		3.30682	2.86027	3.40216	3.27899
169194	hsa-miR-4513	0.827922	0.402357	0.231474	0.168067
169311	hsa-miR-4714-5p	4.01136	4.28451	4.796	5.59664
169156	hsa-miR-4515	N/A	N/A	N/A	N/A
169309	hsa-miR-4802-5p	N/A	N/A	N/A	N/A
169126	hsa-miR-4486	1.1737	0.429293	0.759367	0.357983
169083	hsa-miR-371b-3p	2.04708	1.73232	1.63863	1.71261
169247	hsa-miR-4477a	0.0974026	0.0808081	0.551207	0.645378
169297	hsa-miR-4777-3p	N/A	N/A	N/A	N/A
168989	hsa-miR-4447	5.67857	5.57407	3.73855	3.73782
169092	hsa-miR-548am-3p	N/A	N/A	N/A	N/A
169120	hsa-miR-4787-3p	1.23539	1.38552	1.51873	1.66387
169256	hsa-miR-4666a-5p	1.48701	1.12458	0.89259	0.863866
168998	hsa-miR-4508	3.92695	2.15488	2.89092	1.49748
168982	hsa-miR-4757-3p	N/A	N/A	N/A	N/A
169419	hsa-miR-300	0.251623	0.12963	0.15154	0.117647
168596		1.73701	1.71044	1.9184	1.87563
168662		N/A	N/A	N/A	N/A
168617		1.52597	1.28956	1.22231	1.19832
169153		1.28084	1.24411	1.24563	1.2605
169415	hsa-miR-187-5p	0.0844156	0.030303	0.00333056	0.00168067
169392		N/A	N/A	0.0399667	0.0621849
168751		0.0227273	0.00505051	N/A	N/A
169407	hsa-miR-4301	0.711039	0.744108	0.812656	0.695798
42843	hsa-miR-654-5p	0.0795455	0.0589226	0.0499584	0.0336134
46617	hsa-miR-1197	N/A	N/A	N/A	0.00672269
17438		N/A	N/A	N/A	N/A
17626	hsa-miR-575	0.0292208	0.0353535	0.0649459	0.0621849
42926	hsa-miR-92a-1-5p	0.038961	0.0252525	0.011657	N/A
10928	hsa-miR-125a-5p	4.08604	5.93939	6.83097	8.51765
11154	hsa-miR-517c-3p	N/A	N/A	N/A	0.00504202
42953		0.23539	0.419192	0.512906	0.685714
42746	hsa-miR-647	0.123377	0.12963	0.129892	0.152941
29529	hsa-miR-369-3p	0.00649351	0.0521886	0.572856	0.413445
42782	hcmv-miR-UL148D	0.631494	0.734007	0.905912	0.892437
11229		0.0649351	0.117845	0.0449625	0.0336134
28251	hsa-miR-770-5p	N/A	N/A	N/A	N/A
33902	hsa-miR-128-3p	0.126623	0.350168	0.537885	0.754622
42940	hsa-miR-876-5p	N/A	N/A	N/A	N/A
42568		0.0762987	0.180135	0.244796	0.193277
46336	hsa-miR-1284	0.0925325	0.138047	0.256453	0.22521
42791	hsa-miR-548b-5p	0.0243506	0.0488215	0.0732723	0.0806723
17445	hsa-miR-610	0.0746753	0.040404	N/A	N/A
11083	hsa-miR-371a-3p	3.57955	3.86364	2.96919	3.48739
32608	hsa-miR-761	0.12013	0.26431	1.10741	0.704202
46615		N/A	N/A	N/A	N/A
42947		N/A	N/A	N/A	N/A
42615	hsa-miR-135b-3p	N/A	N/A	N/A	N/A
46818	ebv-miR-BART17-5p	0.0438312	0.040404	0.029975	0.0235294
11000		0.183442	0.311448	0.368027	0.517647
46703	hsa-miR-548e-3p	0.349026	0.420875	0.17985	0.240336
17415	ebv-miR-BART10-3p	0.271104	0.282828	0.186511	0.136134
46385		N/A	0.023569	0.529559	0.230252
28009		0.162338	0.166667	0.146545	0.262185
17315	kshv-miR-K12-3-3p	N/A	N/A	N/A	N/A
17273		0.0665584	0.158249	0.3597	0.327731
42687		0.650974	0.811448	0.757702	0.784874
42850	hsa-miR-150-3p	N/A	N/A	N/A	N/A
46300	hiv1-miR-TAR-3p	0.0243506	0.00841751	N/A	N/A
46243		N/A	N/A	N/A	N/A
46724		0.00487013	N/A	N/A	N/A
31038	hiv1-miR-N367	N/A	N/A	N/A	N/A
46450	hsa-miR-548o-3p	N/A	N/A	N/A	N/A
46695	hsa-miR-1228-3p	0.275974	0.313131	0.341382	0.366387
17624	hsa-miR-532-5p	2.09091	3.5202	3.03247	3.97647
11142		5.4026	5.8569	4.3547	3.55462
42666	hsa-miR-26a-2-3p	0.0665584	0.180135	0.159867	0.196639
42684		N/A	N/A	N/A	N/A
42581	hsa-miR-513a-5p	1.39448	2.08754	1.08243	1.1395
46223	hsa-miR-1306-3p	N/A	N/A	N/A	N/A
17299	hcmv-miR-UL22A-3p	N/A	N/A	N/A	N/A
46347		N/A	0.0117845	0.00832639	0.00504202
19585	hsa-miR-148b-3p	7.32792	11.4579	15.154	20.9899
46485		0.896104	1.07407	0.934221	1.05714
14272	hsa-miR-542-3p	0.0600649	0.0841751	0.136553	0.198319
42651		N/A	N/A	0.0166528	0.0235294
11235		10.1786	10.362	5.82015	5.47059
42772	hsa-miR-566	N/A	0.00673401	0.0133222	0.010084
46326	hsa-miR-1233-3p	0.0178571	0.0319865	0.0349709	0.0352941
42773	ebv-miR-BART17-3p	0.737013	0.794613	0.937552	0.934454
27541	hcmv-miR-UL70-3p	0.652597	0.402357	0.224813	0.104202
10964	hsa-miR-155-5p	0.824675	1.68687	2.00167	2.39832
17332	ebv-miR-BART9-3p	0.00324675	0.00505051	0.00832639	0.010084
42507	hsa-miR-202-5p	N/A	N/A	N/A	N/A
19011	SNORD10	N/A	N/A	0.00499584	N/A
146057		0.26461	0.240741	0.118235	0.092437
26160	spike_control_v2_21	1.45455	1.41077	2.21482	2.44034
24127	spike_control_v2_11	0.0292208	0.0488215	0.153206	0.223529
146219		0.0438312	0.0521886	0.0999167	0.0890756
17848	hsa-miRPlus-A1087	0.496753	0.73569	0.887594	0.971429
42492	hsa-miRPlus-A1031	N/A	N/A	N/A	N/A
146006	hsa-miR-670-5p	0.0227273	0.0218855	0.00999167	0.0184874
146198		0.0275974	0.03367	N/A	N/A
146078		N/A	N/A	N/A	N/A
146166	hsa-miRPlus-G1065-5p	N/A	N/A	N/A	N/A
146164		0.282468	0.43266	0.905912	0.652101
17748		62.4416	114.667	85.4821	112.739
146089	hsv1-miR-H8-5p	0.358766	0.693603	2.55287	0.902521
13421	spike_control_v2_9	11.7386	17.33	17.7652	18.8185
146144		0.314935	0.249158	0.526228	0.317647
146154		0.412338	0.405724	0.128226	0.115966
13388	spike_control_v2_5	0.267857	0.473064	0.481266	0.57479
146071		0.11526	0.037037	0.168193	0.0840336
145844	hsa-miR-374a-5p	N/A	N/A	0.00166528	0.00336134
145725		0.961039	1.00505	1.04746	1.14454
145859	hsa-miR-33a-5p	N/A	N/A	N/A	N/A
105441	hsa-miR-518c-3p	N/A	N/A	N/A	N/A
145827	hsa-miR-200a-5p	N/A	N/A	N/A	N/A
145950	hsa-miR-33b-5p	N/A	N/A	N/A	N/A
145732	hsa-miR-346	0.983766	1.5101	1.06911	1.72773
145821	hsa-miR-518c-5p	6.875	11.8081	7.23064	6.5395
145889	hsa-miR-196b-5p	1.48377	2.43434	2.90758	3.54958
145832		N/A	N/A	N/A	N/A
147794	kshv-miR-K12-8-3p	1.84903	1.37205	0.990841	0.842017
147863	hsa-miR-3155a	0.0227273	0.0016835	N/A	N/A
147793	hsa-miR-4252	N/A	0.010101	N/A	0.0134454
147508		0.800325	1.4899	1.47377	0.983193
147829		N/A	0.00673401	N/A	N/A
147801	hsv1-miR-H11/hsv2-miR-H11-3p	N/A	N/A	N/A	N/A
147554	hsa-miR-4273	0.00974026	0.0218855	0.173189	0.188235
147826	hsa-miR-3153	0.0616883	0.0808081	0.101582	0.10084
147803	hsv2-miR-H10	2.89448	4.93266	1.81016	1.55462
147537	hsa-miR-4264	N/A	N/A	0.00666112	N/A
147859		1.92532	1.98653	2.00333	1.91261
147795	hsa-miR-3186-3p	0.155844	0.188552	0.226478	0.189916
147673	hsa-miR-4262	0.267857	0.414141	0.368027	0.447059
147884	hsv2-miR-H25	1.25974	1.16162	0.641132	0.248739
147929	hsa-miR-1273c	0.136364	0.0942761	0.0982515	0.092437
147834		0.196429	0.112795	0.106578	0.0991597
148239	hsa-miR-3916	N/A	N/A	N/A	N/A
148691	hsa-miR-602	N/A	N/A	N/A	N/A
147376	hsa-miR-3679-5p	0.0357143	0.037037	0.00333056	N/A
147572	hsa-miR-3120-3p	N/A	N/A	N/A	N/A
148398	hsa-miR-3908	0.0292208	N/A	0.0366361	0.0117647
148241	hsa-miR-3649	0.0876623	0.0690236	0.0849292	0.0806723
148147	hsa-miR-181b-3p	N/A	N/A	0.0399667	0.0420168
148616		34.8864	62.6987	61.7169	75.8034
148289	hsa-miR-3675-5p	0.25487	0.60101	1.15237	1.23697
147964	hsa-miRPlus-J1005	N/A	N/A	N/A	N/A
148489	hsa-miR-3674	N/A	N/A	N/A	N/A
148038	hsa-miR-3679-3p	3.45779	2.93603	2.85762	2.52101
148637	hsa-miR-198	0.612013	0.686869	0.609492	0.453782
148388	hsa-miR-3677-3p	N/A	N/A	N/A	N/A
147602	hsa-miR-2682-5p	0.918831	0.6633	0.286428	0.235294
148534		0.00487013	0.0589226	0.0499584	0.0890756
148143		0.712662	1.05219	0.815987	0.92437
148381		0.0373377	0.0757576	0.0932556	0.102521
148602		0.730519	0.333333	0.1199	0.092437
148047		0.170455	0.176768	1.22898	0.678992
148291		0.0503247	0.0841751	0.0882598	0.119328
148146		1.11851	1.22727	0.907577	1.10756
148631		0.323052	0.37037	0.396336	0.321008
148286		0.0681818	0.0387205	0.029975	0.0252101
148542		N/A	N/A	N/A	N/A
148556		N/A	N/A	0.0199833	0.010084
148252		N/A	0.030303	0.0366361	0.0689076
148463		0.337662	0.400673	0.383014	0.368067
148529		N/A	N/A	N/A	N/A
148462		N/A	N/A	N/A	N/A
148304		0.657468	0.744108	0.712739	0.82521
148501		4.71916	5.76094	4.72939	4.83529
148614		0.311688	0.451178	0.432973	0.605042
148073		0.00974026	0.0117845	0.216486	0.142857
148563		N/A	N/A	N/A	N/A
148114		0.316558	0.380471	0.348043	0.458824
148521		0.366883	0.474747	0.394671	0.37479
148460		0.00974026	0.026936	0.0383014	0.0302521
148507		0.0162338	0.117845	0.844296	0.504202
148099		6.20292	13.1919	10.9442	14.0084
148200		0.443182	0.456229	0.451291	0.442017
146158	hsa-miR-3202	44.9513	52.4141	44.2431	44.8924
42461		1.3474	1.58418	1.72523	1.67059
11155	hsa-miR-518a-3p	N/A	N/A	N/A	N/A
46974		N/A	N/A	N/A	N/A
42755	hcmv-miR-US33-3p	0.347403	0.368687	1.67194	1.31261
46610		N/A	N/A	N/A	N/A
168579	hsa-miR-5706	0.0584416	0.0252525	N/A	N/A
168690	hsa-miR-4466	0.0227273	0.047138	0.00499584	0.0117647
168698	hsa-miR-3127-3p	1.6526	1.68519	1.88843	1.93445
46808	hsa-miR-4485-3p	N/A	N/A	N/A	N/A
168843	hsa-miR-5694	2.91071	2.46801	1.68526	1.29748
168732	hsa-miR-5011-5p	N/A	N/A	N/A	N/A
168674	hsa-miR-4716-5p	4.24026	3.98148	3.91341	3.61176
168575	hsa-miR-4763-5p	0.217532	0.341751	0.369692	0.410084
168756	hsa-miR-548al	N/A	N/A	N/A	N/A
168665	hsa-miR-3619-3p	1.21104	1.40404	0.884263	1.11765
168862	hsa-miR-1343-3p	0.00974026	0.013468	N/A	0.00168067
168943	hsa-miR-4769-3p	0.891234	0.959596	1.15071	1.17479
168940	hsa-miR-5579-5p	N/A	N/A	N/A	N/A
168735	hsa-miR-5586-3p	0.0957792	0.10101	0.21149	0.210084
46762	hsa-miR-3928-3p	0.412338	0.183502	0.00166528	0.010084
168642	hsa-miR-642b-3p	19.3344	31.4343	17.7169	15.8622
168909	hsa-miR-3152-5p	0.0746753	0.0909091	0.123231	0.129412
168872	hsa-miR-24-1-5p	0.293831	0.314815	0.341382	0.371429
168763		0.253247	0.195286	0.0815987	0.0672269
169192	hsa-miR-4437	N/A	N/A	N/A	N/A
169019	hsa-miR-4524a-5p	0.0665584	0.037037	N/A	N/A
169312	hsa-miR-548an	12.0731	16.9007	11.7386	15.879
169299	hsa-miR-4538	N/A	N/A	N/A	N/A
169066	hsa-miR-4802-3p	N/A	N/A	N/A	N/A
169109	hsa-miR-5003-5p	N/A	0.016835	0.00832639	0.0201681
169006	hsa-miR-4527	0.0422078	0.03367	0.0349709	0.0319328
169018	hsa-miR-4640-5p	14.6688	24.7862	10.5812	9.11597
169009	hsa-miR-548ap-5p/hsa-miR-548j-5p	0.025974	0.0808081	0.0166528	0.0319328
169142	hsa-miR-550a-5p	23.4221	24.6667	12.1332	9.28403
169295	hsa-miR-4725-3p	0.295455	0.23064	0.667777	0.34958
169370	hsa-miR-4693-5p	N/A	N/A	N/A	N/A
168995	hsa-miR-4791	0.581169	1.27778	2.22481	2.43866
168976	hsa-miR-3135b	0.849026	0.739057	0.544546	0.448739
169016	hsa-miR-4743-5p	4.42695	6.42424	2.87927	2.50252
169154	hsa-miR-4803	N/A	N/A	0.0815987	0.092437
169050	hsa-miR-4787-5p	4.09091	3.73737	4.29808	2.46387
169372	hsa-miR-5011-3p	N/A	N/A	N/A	N/A
169133	hsa-miR-4537	N/A	N/A	N/A	N/A
169339	hsa-miR-5579-3p	4.41721	2.63468	0.669442	0.613445
169148		0.349026	0.345118	0.17985	0.137815
168865		N/A	N/A	N/A	N/A
169352		N/A	N/A	N/A	N/A
169397	hsa-miR-3184-5p	0.293831	0.286195	0.381349	0.485714
168566		0.0730519	0.158249	0.264779	0.32437
169405		27.4886	55.4966	35.4388	49.7479
169300		0.0876623	0.0757576	0.0266445	0.0319328
168554		0.426948	0.89899	2.62448	2.19664
168780		N/A	N/A	N/A	N/A
46210	hsa-miR-1249-3p	1.17695	1.22559	1.31724	1.26555
42543	hsa-miR-608	0.410714	0.259259	0.0632806	0.087395
17431		4.68831	7.18687	5.57036	5.36471
42923	hsa-miR-30c-5p	20.1153	29.3788	26.0433	33.4118
11231		0.951299	1.05724	1.1657	1.17815
42633	hsa-miR-885-3p	0.0373377	0.0942761	0.366361	0.309244
42808	hsa-miR-874-3p	2.63799	2.0202	0.944213	0.905882
45775	hsa-miR-1279	0.038961	0.0420875	0.121565	0.121008
42967		N/A	0.016835	0.0949209	0.0957983
42518		0.00487013	0.016835	0.591174	0.346218
17810	hsa-miR-29b-1-5p	0.241883	0.289562	0.198168	0.287395
17353	hsa-miR-609	0.602273	0.474747	0.256453	0.351261
42584	hsa-miR-432-3p	0.0146104	0.003367	N/A	N/A
42446	hsa-miR-576-5p	0.0503247	0.122896	0.131557	0.196639
42608		N/A	N/A	N/A	N/A
46434		N/A	N/A	N/A	N/A
10975	hsa-miR-182-5p	10.862	13.2104	13.1191	17.6622
17437	kshv-miR-K12-7-3p	N/A	N/A	N/A	N/A
19601		0.337662	0.518519	0.509575	0.509244
46356	hsa-miR-30b-3p	0.290584	0.195286	0.168193	0.115966
33596	hsa-miR-126-5p	0.26461	0.782828	0.606162	1.00672
29190	hsa-miR-708-5p	1.0276	0.558923	0.158201	0.154622
33116		3.00649	1.8771	2.10824	1.61345
14962	hsa-miR-581	N/A	N/A	N/A	N/A
17946	hsa-miR-192-3p	N/A	N/A	N/A	N/A
42709		0.0844156	0.117845	0.121565	0.110924
17563	hsa-miR-644a	0.201299	0.0774411	N/A	0.00504202
17623	ebv-miR-BART14-3p	0.201299	0.121212	0.0999167	0.0991597
17465		4.00649	5.63131	4.50958	4.64706
42456		N/A	0.0117845	0.0699417	0.0184874
11121	hsa-miR-489-3p	0.50974	0.284512	0.219817	0.0789916
46929	hsa-miR-548n	0.00324675	0.00841751	0.0915903	0.110924
42663	hsa-miR-20a-3p	N/A	N/A	N/A	N/A
42883		0.894481	1.0202	0.706078	0.90084
10988	hsa-miR-194-5p	0.326299	0.434343	0.306411	0.541176
14854	hsa-miR-569	0.00811688	0.016835	0.0166528	0.0201681
42816		0.399351	0.159933	0.0333056	0.0319328
32946	hsa-miR-486-5p	2.70617	3.12963	4.68276	5.21681
46322		N/A	N/A	N/A	0.00504202
46698		0.176948	0.203704	0.183181	0.201681
46735	hsa-miR-1179	N/A	N/A	N/A	N/A
46479	hsa-miR-1304-5p	2.15909	3.1229	2.81099	3.41008
28979		0.196429	0.326599	0.221482	0.248739
31076	hsa-miR-559	0.394481	0.612795	0.457952	0.544538
42557	hsa-miR-624-5p	N/A	N/A	N/A	N/A
27537	ebv-miR-BART13-3p	6.39448	7.14141	6.33139	6.22689
42631		0.0746753	0.252525	0.571191	0.531092
17525		0.00324675	0.0016835	N/A	N/A
11225		N/A	N/A	N/A	N/A
42553	hsa-miR-216a-5p	N/A	N/A	N/A	N/A
42546		N/A	N/A	N/A	N/A
42544		0.948052	1.63973	1.53039	2.38151
11253		0.456169	0.526936	0.542881	0.608403
42595		N/A	N/A	N/A	N/A
32891	hsa-miR-769-5p	N/A	N/A	N/A	0.00336134
42763		0.0746753	0.1633	0.0233139	0.0655462
11249		N/A	N/A	N/A	N/A
11245	hsa-miR-433-5p	1.5763	1.63131	3.33888	2.21849
42836		N/A	N/A	N/A	N/A
31867	hsa-miR-145-3p	N/A	0.00505051	0.0316403	0.0403361
27821	spike_control_v2_26	0.243506	0.459596	0.709409	0.818487
27291	spike_control_v2_22	1.80357	1.60101	2.70275	2.84874
146165	hsa-miR-1973	0.0470779	0.0218855	N/A	N/A
146130		N/A	0.016835	N/A	0.0117647
145996		4.80682	9.80303	3.87843	6.7395
146119		0.0714286	0.109428	0.118235	0.119328
13367	spike_control_v2_3	N/A	N/A	N/A	N/A
146012		N/A	N/A	0.0316403	0.0235294
146210		N/A	N/A	0.00333056	0.0218487
146096	hsa-miR-764	0.0909091	0.0707071	0.128226	0.139496
13186	spike_control_v2_2	0.0616883	0.132997	0.184846	0.226891
146223		0.00811688	0.03367	0.0283097	0.0554622
146151	hsa-miR-449c-5p	N/A	N/A	N/A	N/A
145868		N/A	N/A	N/A	N/A
146173	hsa-miR-2114-3p	N/A	N/A	N/A	N/A
29544	spike_control_v2_44	0.503247	0.693603	0.899251	1.18824
17932	hsa-miR-381-5p	N/A	0.013468	0.0149875	0.0302521
146018		N/A	N/A	N/A	N/A
146155		3.25649	3.22222	2.1149	1.98824
146047		0.0470779	0.016835	0.0349709	0.0521008
146136	hsa-miR-518d-5p/hsa-miR-520c-5p/hsa-miR-526a	4.53734	5.05051	3.28226	2.98992
145852	hsa-miR-210-3p	0.758117	1.27778	1.57702	2.88235
145644		0.373377	0.355219	0.812656	0.757983
145742	hsa-miR-935	15.7614	22.7845	10.751	14.5697
145928		0.491883	0.434343	0.143214	0.168067
145915		0.751623	1.55387	1.26228	1.94286
145750	hsa-miR-614	N/A	N/A	N/A	0.00336134
145981	hsa-miR-1285-3p	0.170455	0.198653	0.193172	0.221849
145634	hsa-miR-132-5p	0.038961	0.0909091	0.158201	0.242017
145847	hsa-miR-766-3p	0.199675	0.223906	0.246461	0.257143
147954	hsa-miR-4318	0.441558	0.675084	0.467943	0.648739
147902	hsa-miR-3193	N/A	N/A	N/A	N/A
147994		0.175325	0.183502	0.281432	0.211765
147751	hsa-miR-4274	1.43506	1.41582	1.60366	1.55126
147825		0.193182	0.166667	1.20899	0.712605
147979	hsa-miR-3150a-3p	0.400974	0.244108	0.114904	0.0806723
147532		2.58604	2.43771	2.7194	1.29412
147808		0.00649351	0.0286195	N/A	0.00672269
147540	hsa-miR-4310	0.0535714	0.0690236	0.0999167	0.104202
147828	hsa-miR-3121-3p	N/A	0.0117845	0.00666112	0.00672269
147878		0.100649	0.122896	0.194838	0.260504
147564	hsa-miR-4266	0.178571	0.0808081	0.0199833	0.0201681
147614	hsa-miR-4299	4.42045	8.24242	8.24813	9.82689
147822	hsv2-miR-H23-5p	0.0373377	0.0117845	N/A	N/A
147780	hsa-miR-4267	N/A	N/A	N/A	N/A
148351	hsa-miR-3945	0.214286	0.178451	0.0815987	0.0672269
148597		N/A	N/A	0.228143	0.203361
147511		4.00162	4.68687	6.25978	7.61345
148454	hsa-miR-3682-3p	N/A	N/A	N/A	N/A
147486		N/A	N/A	N/A	N/A
148282	hsa-miR-3714	1.51461	1.56229	1.88843	1.90084
147949		N/A	N/A	N/A	N/A
148039	hsa-miR-3925-5p	0.560065	0.306397	0.113239	0.114286
148601	hsa-miR-3617-5p	N/A	N/A	N/A	N/A
148471	hsa-miR-152-5p	1.87175	2.09259	2.14654	3.25546
147638	hsv2-miR-H12	N/A	N/A	N/A	0.0168067
147600	hsa-miR-4292	2.98052	3.11448	3.77852	3.12941
147707	hsa-miR-3154	12.2987	18.0808	12.0933	9.24034
148371	hsa-miR-3620-3p	0.595779	0.745791	0.591174	0.662185
148061		N/A	N/A	N/A	N/A
148088		N/A	N/A	N/A	N/A
148209		N/A	N/A	N/A	N/A
148227	hsa-miR-1251-3p	0.00811688	0.0252525	0.0349709	0.0789916
148280		0.435065	0.540404	0.524563	0.551261
148277		N/A	N/A	0.00166528	0.0218487
148355		0.133117	0.1633	0.153206	0.171429
148443		0.267857	0.191919	0.0815987	0.0605042
148548		0.0714286	0.0538721	0.0333056	0.0369748
148539		21.7143	47.9276	14.5629	22.8857
148190		0.102273	0.190236	0.184846	0.231933
148437		5.25812	5.45455	4.78268	4.43697
148497		0.131494	0.200337	0.124896	0.176471
148400		0.0941558	0.0791246	0.00499584	0.0403361
148248		0.0308442	0.0420875	0.144879	0.127731
148163		0.0227273	N/A	N/A	N/A
148045		0.00649351	0.0505051	0.0466278	0.0840336
148192	hsa-miR-421	0.131494	0.151515	0.128226	0.171429
148369		2.2013	3.21549	1.66361	1.2437
148433		10.8166	13.0185	12.3847	11.9933
148424		0.0714286	0.180135	0.363031	0.416807
148198		0.993506	0.959596	0.464613	0.554622
148399		N/A	N/A	N/A	N/A
148487		0.0568182	0.020202	N/A	0.00336134
148629		0.373377	0.481481	0.601166	0.763025
148169		0.516234	0.63468	0.759367	0.736134
148506		N/A	N/A	N/A	N/A
46264	hsa-miR-298	1.24026	1.75253	0.792673	1.01681
14312		0.340909	0.146465	0.0133222	0.0201681
17290		0.0957792	0.127946	0.149875	0.179832
42619		1.18019	1.64478	1.38218	1.87563
42738	hsa-miR-340-3p	4.49675	4.06566	3.27061	3.52101
168631	hsa-miR-4723-5p	0.501623	0.29798	0.158201	0.157983
168952	hsa-miR-4781-3p	0.873377	1.86195	1.82848	2.73277
168564	hsa-miR-548at-5p	0.00162338	0.00841751	N/A	0.00504202
168595	hsa-miR-1185-2-3p	18.9042	21.2643	14.5112	11.4874
168622	hsa-miR-4652-5p	N/A	N/A	N/A	N/A
168571	hsa-miR-550b-2-5p	3.57305	3.89899	1.99167	1.59832
168727	hsa-miR-4426	0.474026	1.71044	3.45212	2.92437
168951	hsa-miR-548as-3p	0.26461	0.415825	0.348043	0.490756
168800	hsa-miR-4724-5p	0.324675	0.222222	0.128226	0.0722689
168567	hsa-miR-3177-5p	N/A	N/A	N/A	N/A
168748	hsa-miR-320e	0.100649	0.158249	0.417985	0.47563
168655	hsa-miR-5588-5p	1.46104	1.47811	1.00583	1.89412
168725	hsa-miR-4700-5p	N/A	0.00505051	0.0466278	0.0453782
168691	hsa-miR-3677-5p	0.0324675	0.0353535	0.0133222	0.0201681
168961		N/A	N/A	N/A	N/A
168626	hsa-miR-4662a-5p	N/A	N/A	N/A	0.0403361
168900	hsa-miR-4721	N/A	N/A	N/A	0.00504202
168736	hsa-miR-4796-3p	7.5	7.01515	2.57785	3.34622
168971	hsa-miR-4449	0.0746753	0.0319865	N/A	0.00504202
168875	hsa-miR-5091	0.0454545	0.0656566	0.201499	0.144538
168999	hsa-miR-4749-3p	1.75	1.74411	2.04996	1.88067
169139	hsa-miR-5192	0.288961	0.659933	0.361366	0.416807
169218	hsa-miR-5189-5p	0.305195	0.382155	1.13239	1.07731
169101	hsa-miR-4469	0.00324675	0.00841751	0.0216486	0.0268908
169119	hsa-miR-4786-3p	N/A	N/A	N/A	N/A
169367	hsa-miR-4444	4.03247	7.50505	2.90425	2.60168
169087	hsa-miR-149-3p	21.5357	17.1296	18.418	14.3866
169081	hsa-miR-4707-3p	0.344156	0.400673	0.426311	0.47563
169033	hsa-miR-5680	N/A	N/A	N/A	N/A
169027	hsa-miR-3973	N/A	N/A	N/A	N/A
169004	hsa-miR-4798-5p	N/A	N/A	N/A	N/A
169055	hsa-miR-3529-5p	N/A	N/A	N/A	N/A
169255	hsa-miR-4708-5p	5.35877	4.61279	3.76353	4.07563
169359	hsa-miR-3160-5p	0.181818	0.178451	0.143214	0.201681
169141	hsa-miR-4423-3p	0.586039	0.700337	0.757702	0.833613
169048	hsa-miR-4736	0.0438312	0.030303	N/A	0.00672269
168997	hsa-miR-5584-5p	3.28734	3.30976	2.15154	1.43697
169273	hsa-miR-548ar-3p	N/A	N/A	N/A	N/A
169303	hsa-miR-378g	11.6494	15.3889	4.53789	6.66387
169138	hsa-miR-4504	0.180195	0.0723906	0.41965	0.344538
168556		0.688312	0.599327	3.5154	2.46723
169104		1.91234	2.64141	2.21482	3.43361
169290		0.441558	0.488215	0.601166	0.532773
169146		0.368506	0.153199	0.0216486	0.0218487
169420	hsa-miR-193b-5p	0.285714	0.247475	0.274771	0.25042
169403		0.212662	0.284512	6.2015	3.58151
169408	hsa-miR-181d-5p	1.06331	2.1229	2.28809	3.12269
168762		0.0698052	0.0505051	0.0233139	0.0302521
17313		N/A	0.010101	0.00499584	0.00672269
42576	hsa-miR-342-5p	0.00162338	N/A	0.134888	0.0907563
46869	hsa-miR-1258	0.362013	0.829966	2.30974	2.0437
46429		0.0146104	0.0218855	0.029975	0.0369748
42933		0.428571	0.476431	0.704413	0.514286
11004	hsa-miR-203a-3p	4.04058	4.48316	6.85096	8.5563
19588	hsa-miR-17-3p	0.12987	0.0656566	0.0349709	0.0420168
46732	hsa-miR-1264	0.137987	0.13468	0.256453	0.134454
29328	hsa-miR-582-3p	0.0308442	0.047138	0.109908	0.151261
42574		0.202922	0.29798	0.233139	0.27395
46802		16.4221	22.4057	32.1382	39.7664
42622	hsa-miR-579-3p	N/A	N/A	N/A	N/A
42907		N/A	N/A	N/A	N/A
46404	hsa-miR-1244	N/A	0.010101	N/A	0.0151261
17875	hsa-miR-500a-5p	0.102273	0.0774411	0.0649459	0.0756303
42835		N/A	N/A	N/A	0.0117647
42916		0.126623	0.213805	0.457952	0.373109
42572	hsa-miR-154-3p	0.00811688	0.0016835	0.0499584	0.0352941
33177		0.11526	0.190236	0.462948	0.633613
42646		N/A	N/A	N/A	N/A
17378		0.0568182	0.0656566	0.0766028	0.0722689
29577	hsa-miR-374a-3p	0.141234	0.176768	0.274771	0.334454
46625	hsa-miR-1303	0.0308442	0.0589226	0.0865945	0.119328
10995	hsa-miR-199a-3p/hsa-miR-199b-3p	3.75487	3.90741	6.33972	7.33445
42880		0.397727	0.409091	0.724396	0.689076
27549	hsa-miR-548d-3p	N/A	N/A	N/A	N/A
17552		0.266234	0.33165	1.46045	1.15966
42915		0.0422078	0.0791246	0.126561	0.154622
11182	hsa-miR-98-5p	27.3766	53.8199	40.8659	48.3109
27536	hsa-miR-190a-5p	N/A	N/A	N/A	N/A
42837	hsa-miR-577	N/A	N/A	N/A	N/A
46788	hsa-miR-1299	1.11364	1.66667	1.92506	2.47731
11061	hsa-miR-329-3p	N/A	N/A	N/A	N/A
17349	hsa-miR-595	0.0405844	0.0824916	0.104913	0.109244
42647		0.00324675	0.0319865	0.0616153	0.0369748
16681		4.86364	8.68013	6.44463	5.9916
46766	hsa-miR-1208	N/A	N/A	N/A	N/A
42642		N/A	N/A	0.298085	0.179832
46320	hsa-miR-31-3p	N/A	0.0185185	0.00666112	0.00336134
11065	hsa-miR-335-5p	0.103896	0.0723906	0.158201	0.117647
10925	hsa-miR-10b-5p	65.1607	97.4512	73.5154	86.9412
42830		N/A	N/A	N/A	N/A
46872	hsa-miR-1262	0.0308442	0.0420875	0.451291	0.428571
21702	hsa-miR-219a-1-3p	0.11039	0.16835	1.23231	1.05714
46246	hsa-miR-1226-5p	N/A	N/A	N/A	N/A
42594		0.0227273	0.00505051	N/A	N/A
42946		1.55357	1.33838	1.78018	1.78992
46640	hsa-miR-1257	N/A	0.0420875	0.336386	0.267227
42670		1.25649	1.9798	2.25479	2.6437
11022	hsa-miR-221-3p	1.87338	2.71212	4.18152	5.3563
30768		1.19156	1.08418	0.950874	0.956303
42627	hsa-miR-212-3p	6.53247	10.0084	7.29559	12.0555
45745	hsa-miR-302f	N/A	N/A	N/A	N/A
10936	hsa-miR-130b-3p	0.626623	0.422559	0.484596	0.410084
42555		N/A	0.037037	0.159867	0.188235
17851	hsa-miR-200c-5p	0.00162338	0.016835	0.00666112	0.0134454
42906	ebv-miR-BHRF1-1	0.88474	1.02357	1.51041	1.56303
42730	hsa-miR-423-3p	0.748377	0.860269	2.11324	2.22017
42489		N/A	N/A	N/A	0.00168067
17825	hsa-miR-338-5p	N/A	N/A	0.00166528	N/A
146027		N/A	N/A	N/A	N/A
146109	hsa-miR-1910-5p	0.00974026	0.0252525	0.0183181	0.00504202
19004		44.1753	58.2121	85.7535	105.373
146221		0.823052	1.57576	1.79017	2.21176
11279	RNU6-1_RNU6-2	0.931818	1.42593	1.47544	1.67899
17955		3.86201	5.78956	4.66278	6.76807
27833	spike_control_v2_27	8.93182	11.5589	21.8168	30.8
13389	spike_control_v2_6	0.0146104	0.010101	0.071607	0.0689076
146104		0.0146104	0.0319865	N/A	0.00504202
24163	spike_control_v2_13	2.26461	2.64983	4.99251	5.27059
29564	spike_control_v2_45	3.30844	4.1431	3.65362	4.81849
146046	jcv-miR-J1-5p	0.0827922	0.0892256	0.0682764	0.0487395
19606	SNORD12	N/A	0.013468	0.0266445	0.0890756
146196	hsa-miR-711	10.3701	21.3805	12.6211	12.0067
146015		0.0162338	0.023569	0.071607	0.0201681
145991		0.803571	0.979798	1.58201	2.03529
42839	hsa-miR-135a-5p	N/A	N/A	N/A	0.0168067
146103	hsa-miR-1913	1.68344	1.60438	1.85679	1.86218
28444	spike_control_v2_33	2.2987	2.59259	4.6761	5.32941
146149	hsv2-miR-H2	N/A	N/A	N/A	N/A
145686	hsa-miR-548c-3p	N/A	N/A	N/A	N/A
145819	hsa-miR-520c-3p	N/A	N/A	N/A	N/A
146076		0.633117	0.604377	0.824313	0.695798
145703		N/A	N/A	N/A	N/A
145724	hsa-miR-887-3p	0.0146104	0.023569	0.0199833	0.0184874
145753	hsa-miR-484	1.43831	1.47306	1.597	1.52941
145974	hsa-miR-200b-5p	0.222403	0.158249	0.0383014	0.0403361
145839	hsa-miR-662	0.00162338	0.023569	0.0133222	0.0352941
145826	hsa-miR-18b-3p	2.2289	2.27441	2.60949	2.5395
145976	hsa-miR-663b	0.00487013	N/A	N/A	N/A
147998		0.0243506	0.0151515	N/A	N/A
147816	hsa-miR-3162-5p	0.118506	0.170034	0.694421	0.463866
147819	hsa-miR-3117-3p	N/A	0.00505051	0.0732723	0.0554622
147871	hsa-miR-3180-5p	1.44643	1.4798	1.70691	1.86723
147683	hsa-miR-3188	N/A	N/A	N/A	N/A
147809	hsa-miR-514b-3p	N/A	0.023569	0.011657	0.0218487
147990		39.3604	61.2458	43.9767	51.4387
147512		23.0698	27.564	17.8784	23.4336
147912		0.0714286	0.356902	0.0516236	0.258824
147805	hsa-miR-3183	3.82143	3.36869	3.29226	3.20672
147913		6.98539	25.8805	11.9351	24.084
147812		1.84903	2.46296	5.34721	5.22521
147852	hsa-miR-4295	N/A	N/A	N/A	N/A
147882	hsa-miR-2909	N/A	N/A	N/A	N/A
147866	hsa-miR-3134	N/A	N/A	N/A	N/A
147786	hsa-miR-3198	0.542208	0.361953	0.136553	0.10084
148619		0.5	0.473064	1.60866	1.18319
10907	spike_control_v1_h	N/A	N/A	N/A	N/A
148384	hsa-miR-3648	N/A	N/A	N/A	N/A
148085	hsa-miR-3687	0.100649	0.0875421	0.139883	0.0840336
148188	hsa-miR-2277-5p	N/A	N/A	N/A	N/A
147280	hsa-miR-1185-1-3p	8.22727	9.05892	5.42714	3.93277
147469	hsa-miR-3909	N/A	N/A	N/A	N/A
147779	hsa-miR-3180-3p	0.0308442	N/A	N/A	N/A
148590	hsa-miR-3919	N/A	N/A	N/A	N/A
148065	hsa-miR-3689b-3p/hsa-miR-3689c	N/A	0.013468	0.0932556	0.0655462
147386	hsa-miR-212-5p	0.0227273	0.0353535	0.011657	0.0285714
148402	hsa-miR-3920	0.681818	0.878788	0.651124	0.842017
148628	hsa-miR-3199	N/A	0.00505051	N/A	N/A
148064	hsa-miR-3926	0.344156	0.464646	0.442964	0.546218
148317	hsa-miR-3621	0.0292208	0.037037	N/A	N/A
148571		N/A	N/A	0.234804	0.247059
148522		N/A	N/A	N/A	N/A
148249		1.02273	1.31313	1.34888	1.37479
148036		3.85714	3.71886	2.46461	3.0084
148020		0.63474	0.422559	0.186511	0.146218
148310		0.926948	0.589226	0.158201	0.12605
148105		N/A	N/A	N/A	N/A
148187	hsa-miR-410-5p	10.849	17.569	4.9542	7.5479
148690		0.556818	0.56229	0.779351	0.635294
148041		0.0194805	N/A	N/A	N/A
148129		0.0243506	0.040404	0.0466278	0.0470588
148218		1.94318	1.68687	1.69026	1.85714
148647		0.503247	0.727273	0.812656	1.64034
148561		N/A	N/A	N/A	0.00504202
148591		N/A	0.00841751	0.221482	0.104202
148411		1.09091	1.40909	2.04163	2.22521
148010		0.0616883	0.0622896	0.0149875	0.0285714
148100		0.766234	0.863636	0.852623	0.746218
148148		N/A	0.0252525	0.00832639	0.0336134
148415		1.16558	0.804714	0.506245	0.416807
148598		0.0275974	0.0252525	0.00832639	0.0352941
148390		N/A	N/A	N/A	N/A
148254		0.0243506	0.016835	0.0399667	0.0235294
148370		3.17045	2.93434	2.00666	1.74286
148177		N/A	N/A	N/A	N/A
148404		0.211039	0.287879	0.334721	0.361345
148341		N/A	0.0016835	N/A	N/A
11144	hsa-miR-512-3p	N/A	N/A	N/A	N/A
11037	hsa-miR-299-3p	0.0633117	0.10101	0.186511	0.12605
42774	kshv-miR-K12-9-5p	0.826299	0.855219	0.994172	0.993277
17425		N/A	0.00505051	0.00666112	0.0319328
146083		N/A	N/A	N/A	N/A
168646	hsa-miR-4731-3p	1.59416	1.60606	1.96503	2.11933
168958	hsa-miR-2681-5p	0.0616883	0.0353535	0.00666112	0.0252101
168677		15.2127	15.3283	17.2223	19.6134
168808	hsa-miR-4779	0.0162338	0.0252525	N/A	N/A
168796	hsa-miR-3664-3p	10.2192	12.9259	2.34971	2.62689
168625	hsa-miR-4539	N/A	0.0016835	N/A	0.00840336
168593	hsa-miR-4726-3p	0.0373377	0.111111	0.103247	0.131092
168632	hsa-miR-5188	0.00811688	0.0117845	0.00832639	0.0184874
168898	hsa-miR-5008-3p	0.0795455	0.0673401	0.0183181	0.0235294
168559	hsa-miR-15a-3p	0.00324675	0.0521886	0.0283097	0.0537815
168765	hsa-miR-4448	0.00811688	0.030303	0.0266445	0.0739496
168849	hsa-miR-4635	0.350649	0.350168	0.241465	0.235294
168614	hsa-miR-5197-5p	0.311688	0.324916	0.398002	0.352941
168683	hsa-miR-4792	N/A	0.0016835	0.0133222	0.010084
168790	hsa-miR-3120-5p	0.0503247	0.0639731	0.0932556	0.110924
168806	hsa-miR-4659a-3p	N/A	0.00841751	0.0233139	0.0302521
168924	hsa-miR-4720-5p	N/A	N/A	N/A	N/A
168891	hsa-miR-1271-3p	N/A	N/A	N/A	N/A
168928	hsa-miR-4431	0.425325	0.144781	0.461282	0.144538
168702	hsa-miR-4540	0.964286	1.08754	0.621149	0.941176
169080	hsa-miR-4684-5p	0.305195	0.287879	0.407993	0.49916
169056	hsa-miR-4669	0.183442	0.175084	0.626145	0.376471
169253	hsa-miR-4690-5p	0.496753	0.341751	0.249792	0.178151
169022	hsa-miR-4797-5p	0.189935	0.215488	0.587843	0.583193
169266	hsa-miR-378d	7.10877	9.11111	8.10991	8.8084
169334	hsa-miR-548ao-5p	N/A	N/A	N/A	N/A
169262	hsa-miR-5009-5p	0.188312	0.126263	0.41965	0.436975
169079	hsa-miR-4667-5p	5.30844	15.3754	13.3822	13.2891
169213	hsa-miR-4768-3p	0.670455	0.973064	1.37885	1.4
169355	hsa-miR-2355-5p	0.647727	0.776094	0.940883	1.0437
169238	hsa-miR-4654	4.65909	6.11279	2.25812	2.41345
169363	hsa-miR-320c	0.774351	1.31481	4.08659	4.14958
169061	hsa-miR-548x-3p	N/A	N/A	N/A	N/A
169082	hsa-miR-1275	12.8701	24.0657	61.6436	50.1815
169096	hsa-miR-4804-3p	0.420455	0.520202	0.47627	0.601681
169304	hsa-miR-4793-5p	N/A	N/A	N/A	N/A
169171	hsa-miR-4436b-5p	43.0714	73.4781	53.4338	58.9076
169356	hsa-miR-548aa/hsa-miR-548ap-3p/hsa-miR-548t-3p	0.0243506	0.0521886	0.0216486	0.0319328
169084	hsa-miR-5708	N/A	N/A	N/A	N/A
169020	hsa-miR-4506	0.00974026	0.0387205	0.114904	0.151261
169331		N/A	0.003367	0.00832639	0.0235294
169344		0.13474	0.144781	0.244796	0.257143
169025		0.642857	0.397306	0.464613	0.430252
168777		0.172078	0.131313	0.0283097	0.0420168
169414	hsa-miR-525-5p	0.086039	0.047138	N/A	N/A
168826		13.487	12.404	10.9725	8.9563
169399	hsa-miR-4750-5p	0.842532	0.843434	2.25978	1.02185
169008		9.53571	24.3131	19.7002	24.4017
169105		2.1737	2.07912	2.41799	3.8
42494		1.93994	1.9596	2.16486	2.2958
17418	kshv-miR-K12-4-3p	0.180195	0.0993266	0.00999167	0.010084
42891		0.530844	0.612795	0.5995	0.759664
46816		0.0681818	0.0723906	0.124896	0.129412
42757	hsa-miR-619-3p	N/A	N/A	N/A	N/A
11108	hsa-miR-425-3p	2.44643	3.39899	3.90341	4.43529
11015		2.92532	4.27441	4.96753	5.56807
42853		0.00974026	0.00673401	0.0782681	0.0689076
42829	hsa-miR-127-3p	9.35227	8.02525	4.96253	6.06723
46259	hsa-miR-885-5p	0.0681818	0.102694	0.0799334	0.102521
46737	hsa-miR-1265	0.150974	0.26431	0.384679	0.536134
42658		0.211039	0.132997	0.0249792	0.0218487
42719		1.30195	1.40741	1.64363	1.80504
42470		N/A	N/A	0.0233139	0.0621849
42535	hsa-miR-661	0.012987	N/A	0.103247	0.087395
42601		0.0113636	N/A	N/A	N/A
42542	hsa-miR-589-5p	0.282468	0.239057	0.219817	0.218487
42680		0.150974	0.102694	N/A	N/A
42607	hsa-miR-653-5p	N/A	N/A	N/A	N/A
17646	ebv-miR-BHRF1-3	0.422078	0.441077	0.343047	0.32605
17893	hsa-miR-362-3p	N/A	N/A	N/A	N/A
6880	hsa-miR-297	0.0698052	0.104377	0.0965862	0.122689
42448		0.185065	0.173401	0.133222	0.136134
32095	hsa-miR-624-3p	N/A	N/A	0.0399667	0.0319328
42567	hsa-miR-590-3p	0.0438312	0.0791246	0.0749376	0.0840336
42903		N/A	N/A	N/A	N/A
42879		0.262987	0.346801	0.253122	0.327731
42758		0.0584416	0.0488215	0.011657	0.00840336
30973		N/A	N/A	N/A	N/A
17325	hsa-miR-643	N/A	N/A	N/A	N/A
42714		N/A	N/A	N/A	0.0184874
17630	hsa-miR-588	0.00324675	0.0016835	0.00832639	0.0134454
42941	hsa-miR-218-1-3p	0.772727	0.742424	0.676103	0.952941
42944	hsa-miR-564	N/A	N/A	N/A	N/A
14305		N/A	N/A	N/A	N/A
42562	hsa-miR-105-3p	0.102273	0.026936	N/A	N/A
42571	hsa-miR-129-1-3p	1.12825	1.31313	1.29892	1.38824
17439	hcmv-miR-UL36-5p	0.0454545	0.0319865	0.144879	0.168067
46443	hsa-miR-193a-5p	0.0211039	N/A	N/A	N/A
10923	hsa-miR-107	2.83117	3.92761	4.25645	5.51261
46850	hsa-miR-1237-3p	0.590909	0.584175	0.629475	0.694118
27672	hsa-miR-615-3p	0.142857	0.159933	0.186511	0.223529
17503	hsa-miR-590-5p	N/A	N/A	N/A	N/A
13140	hsa-miR-138-5p	N/A	N/A	N/A	N/A
42449		N/A	N/A	N/A	N/A
11013	hsa-miR-181a-3p	0.0178571	0.0858586	0.0865945	0.168067
46674		N/A	N/A	N/A	N/A
42733		0.75974	0.939394	0.972523	1.1042
46328		0.0730519	0.0606061	0.0233139	0.0554622
29802	hsa-miR-144-3p	0.167208	0.382155	0.829309	1.23025
42551	hsa-miR-122-3p	1.23701	1.6633	1.62365	1.96639
42899	hsa-miR-377-5p	N/A	0.0286195	0.0466278	0.092437
42885	hsa-miR-376a-5p	0.547078	0.905724	0.860949	1.04202
42956	hsa-miR-545-5p	N/A	N/A	N/A	N/A
42968		0.0292208	0.020202	0.0316403	0.0470588
13149		N/A	N/A	N/A	N/A
17732	hsa-miR-192-5p	4.88799	7.38889	8.1149	9.10924
46746	hsa-miR-1269a	N/A	N/A	N/A	N/A
46251		0.150974	0.343434	0.261449	0.344538
42669	hsa-miR-505-3p	N/A	N/A	0.0616153	0.0840336
146135		N/A	N/A	N/A	N/A
146019		3.76786	6.65152	6.68443	7.44538
146172		20.8555	38.1751	24.5812	27.1311
4040	hsa-miR-9-5p	2.05682	3.23401	4.79101	5.3479
146195		N/A	N/A	N/A	N/A
42793	hsa-miRPlus-A1072	7.58279	12.1481	7.38218	7.33277
17892	hsa-miR-372-5p	2.46753	1.70034	1.04913	0.847059
146222		N/A	0.026936	0.0266445	0.0487395
17927		0.308442	0.326599	0.0532889	0.0789916
146187		0.246753	0.279461	0.29642	0.32605
146010	hsa-miR-2116-5p	2.3474	3.69024	2.04496	2.09748
146140	hsa-miR-1976	0.288961	0.329966	0.3597	0.408403
146184		N/A	N/A	N/A	N/A
146088		0.366883	0.232323	0.0632806	0.105882
146142	hsa-miR-1972	N/A	N/A	N/A	N/A
146163	hsa-miR-224-3p	0.323052	0.617845	1.66528	1.51429
146143		4.44968	4.19192	2.90258	3.65042
19013	SNORD14B	0.987013	1.9798	1.97835	2.40168
146054		0.881494	0.922559	0.907577	1.04706
11177		5.48052	5.1835	3.0458	3.01176
145749	hsa-miR-137	N/A	N/A	N/A	N/A
145740		5.14773	4.73906	3.30891	3.68908
145805		3.47078	8.75926	4.72773	7.18992
145970	hsa-miR-129-2-3p	1.04058	1.2138	1.42714	1.44706
145822	hsa-miR-214-5p	0.105519	0.117845	0.146545	0.211765
145789	hsa-miR-550a-3-5p/hsa-miR-550a-5p	6.08766	8.86869	2.99251	3.60168
145768	hsa-miR-665	1.01623	0.644781	0.348043	0.305882
145972	hsa-miR-141-5p	N/A	0.0117845	0.0183181	0.0352941
145746	hsa-let-7i-3p	0.0844156	0.171717	0.27144	0.423529
145676	hsa-miR-30e-3p	2.07143	3.32155	3.63031	4.90084
147604	hsa-miR-4285	5.69643	6.39394	4.13655	4.27227
147899		0.128247	0.180135	0.144879	0.156303
147915	hsa-miR-3174	3.53734	5.68013	2.95754	3.84874
147804	hsv1-miR-H17	0.420455	0.309764	0.243131	0.0823529
147983		0.0146104	0.00673401	0.0199833	0.00840336
147613	hsa-miR-3145-3p	0.0275974	0.0690236	0.169858	0.188235
147813		2.16234	2.51347	3.32723	3.02689
147655		147.127	158.665	139.634	141.139
147800		0.0811688	0.132997	0.163197	0.144538
147918		0.642857	0.994949	1.12406	1.4958
147570	hsa-miR-4271	N/A	N/A	N/A	N/A
147523	hsa-miR-4263	0.0665584	0.0875421	0.407993	0.391597
147947	hsa-miR-4308	1.41071	1.27441	0.874271	1.01008
147694	hsa-miR-4281	0.0308442	N/A	N/A	N/A
147772	hsa-miR-4303	0.163961	0.0791246	0.0166528	0.0184874
148374	hsa-miR-3936	N/A	N/A	N/A	N/A
148263	hsa-miR-1273e	1.75812	2.73737	1.42714	1.75294
148585	hsa-miR-3912-3p	0.0373377	0.0016835	0.0682764	0.0336134
148331	hsa-miR-3655	N/A	N/A	N/A	N/A
147262	hsa-miR-548h-3p/hsa-miR-548z	0.51461	0.627946	0.398002	0.388235
148410		9.76136	10.3906	9.17402	10.0403
148214	hsa-miR-3675-3p	4.2013	4.68855	4.12989	4.42521
147684	hsa-miR-3200-5p	N/A	N/A	N/A	N/A
148228	hsa-miR-3656	0.373377	0.464646	0.642798	0.54958
148641	hsa-miR-518b	0.875	0.944444	1.08077	1.22017
148353	hsa-miR-3681-5p	N/A	N/A	N/A	N/A
148132	hsa-miR-3622a-3p	0.376623	0.410774	0.354704	0.393277
148272	hsa-miR-3615	N/A	N/A	0.00166528	0.00672269
148216	hsa-miR-3907	N/A	N/A	N/A	N/A
148621	hsa-miR-892a	0.162338	0.164983	0.154871	0.184874
147389	hsa-miR-3691-5p	0.251623	0.0555556	N/A	N/A
148485		46.0308	60.6195	45.9684	51.7899
148681		N/A	N/A	N/A	N/A
148081		1.15747	1.24411	1.37719	1.53277
148544		3.12662	5.13973	1.35387	1.29076
148553		9.84903	10.2037	6.54288	9.19664
148565		N/A	0.0016835	N/A	0.00336134
148394		N/A	N/A	N/A	N/A
148432		1.83279	2.72222	2.75937	4.07059
148417		1.81331	1.8771	1.8751	1.90084
148244		1.35227	2.28956	1.21232	1.4437
148372		N/A	N/A	N/A	N/A
148366		N/A	N/A	N/A	N/A
148479		0.220779	0.12963	0.041632	0.0588235
148184		0.170455	0.26431	0.234804	0.27563
148250	hsa-let-7f-2-3p	0.00649351	0.013468	0.00666112	N/A
148260		N/A	N/A	0.00166528	0.00840336
148606		N/A	N/A	N/A	N/A
148226		0.396104	0.481481	0.407993	0.463866
148055		N/A	0.00673401	0.0199833	0.0588235
148655		0.181818	0.250842	0.168193	0.186555
148095		N/A	N/A	N/A	N/A
148127		0.108766	0.195286	0.144879	0.171429
148096		0.0422078	0.0976431	0.0899251	0.198319
148324		0.00324675	N/A	N/A	N/A
148409		0.693182	0.734007	0.632806	0.764706
148029		N/A	N/A	N/A	N/A
46367	hsa-miR-1283	0.0941558	0.0521886	0.00999167	0.0151261
30147	spike_control_v2_47	1.01461	1.0101	1.32223	1.40336
145999	hsa-miR-517a-3p/hsa-miR-517b-3p	N/A	0.0016835	N/A	0.00168067
146189		1.22403	1.16498	1.32223	1.38151
145723	hsa-miR-519c-3p	0.025974	0.0151515	N/A	0.00168067
168563	hsa-miR-4761-5p	N/A	N/A	N/A	N/A
168635	hsa-miR-378e	5.71266	9.35185	8.34971	8.62185
168803	hsa-miR-4696	N/A	N/A	N/A	N/A
168692	hsa-miR-3688-5p	0.00324675	0.010101	0.0133222	0.0134454
168739	hsa-miR-1269b	0.0633117	0.00841751	N/A	N/A
168711	hsa-miR-548ak	N/A	N/A	N/A	N/A
168768	hsa-miR-4423-5p	0.334416	0.271044	0.224813	0.309244
168589	hsa-miR-4671-3p	N/A	N/A	N/A	N/A
168923	hsa-miR-4688	0.746753	0.39899	0.293089	0.255462
168772	hsa-miR-224-5p	N/A	0.0218855	0.238135	0.22521
168973	hsa-miR-1268b	0.24513	0.501684	0.537885	0.388235
168793	hsa-miR-4483	0.0600649	0.0909091	0.149875	0.216807
168731	hsa-miR-548ah-3p	N/A	N/A	N/A	N/A
168950	hsa-miR-4646-3p	0.595779	0.606061	0.65612	0.660504
168578	hsa-miR-5190	0.501623	0.213805	0.0582848	0.0521008
168722	hsa-miR-4742-3p	4.4513	6.08586	4.38301	6.00336
168893	hsa-miR-4505	3.66558	2.49158	3.22565	1.9042
168789	hsa-miR-4686	N/A	N/A	0.0149875	0.00336134
168561	hsa-miR-1245b-5p	N/A	N/A	N/A	N/A
168627	hsa-miR-4678	2.76299	2.71044	1.14405	1.26387
169166	hsa-miR-4683	0.0373377	0.0909091	0.0999167	0.14958
169307	hsa-miR-4685-3p	0.141234	0.234007	0.226478	0.257143
169257	hsa-miR-4740-5p	N/A	0.0016835	0.0482931	0.0504202
169269	hsa-miR-4499	0.188312	0.164983	0.15154	0.132773
169165	hsa-miR-5585-5p	N/A	N/A	N/A	N/A
169298	hsa-miR-4433a-5p	0.969156	0.873737	0.905912	0.90084
169236	hsa-miR-659-5p	0.37013	0.324916	0.284763	0.226891
169162	hsa-miR-5691	0.23539	0.0925926	0.029975	0.0184874
169376	hsa-miR-5701	0.454545	0.661616	1.18401	1.29076
169329	hsa-miR-370-3p	0.147727	0.148148	0.224813	0.307563
169179	hsa-miR-4650-5p	0.0357143	0.0016835	N/A	N/A
169332		0.121753	0.13468	0.0965862	0.168067
169073	hsa-miR-584-3p	0.0194805	0.016835	0.00333056	0.010084
169274	hsa-miR-5196-3p	0.25	0.249158	0.261449	0.282353
169010	hsa-miR-2681-3p	0.199675	0.161616	0.0949209	0.0840336
169343	hsa-miR-5682	N/A	N/A	N/A	N/A
169135	hsa-miR-3173-5p	0.293831	0.326599	0.399667	0.405042
169042	hsa-miR-4704-3p	N/A	0.00841751	N/A	0.00336134
169088	hsa-miR-4492	0.188312	0.0808081	0.158201	0.0268908
169054	hsa-miR-4422	0.163961	0.153199	0.169858	0.0991597
169411	hsa-miR-205-3p	1.76461	2.15152	1.55537	2.17311
169417	hsa-miR-551b-5p	0.00974026	0.0016835	N/A	N/A
169347		0.0779221	0.112795	0.0899251	0.141176
169393	hsa-miR-4747-5p	57.2435	68.2879	52.2115	47.6655
169150		0.201299	0.314815	0.38801	0.47395
168873		0.149351	0.0892256	0.0516236	0.0352941
168907		N/A	N/A	N/A	N/A
168720		3.93019	5.81313	1.44047	2.51092
169348		N/A	N/A	N/A	N/A
42460	hsa-miR-223-5p	N/A	N/A	N/A	0.0134454
14297		0.813312	0.792929	0.304746	0.448739
42859	hsa-miR-675-3p	2.125	2.49158	1.95504	1.80168
46211		N/A	N/A	N/A	N/A
17513		0.547078	0.272727	0.199833	0.119328
42905	hcmv-miR-US25-1-5p	N/A	N/A	N/A	N/A
16528		1.85552	2.24747	1.43714	2.8521
11277	hsa-miR-7-1-3p	0.0243506	0.0488215	0.0815987	0.0857143
17818	hsa-miR-27a-5p	0.142857	0.0959596	0.0799334	0.0991597
17652	hsa-miR-558	N/A	N/A	N/A	N/A
27572		15.961	34.335	12.8243	12.6605
42483	hsa-miR-522-3p	0.0438312	0.043771	0.0283097	0.0403361
28520	hsa-miR-454-5p	0.0779221	0.126263	0.128226	0.136134
14303		N/A	N/A	0.011657	0.010084
42872		0.11039	0.111111	0.113239	0.122689
11266		0.217532	0.181818	0.223147	0.208403
32884	hsa-miR-342-3p	N/A	0.010101	0.0166528	0.0487395
17529	hcmv-miR-US25-2-3p	1.47727	1.39057	0.751041	0.72437
46844		N/A	N/A	N/A	N/A
19596	hsa-miR-30d-5p	4.99351	6.6431	6.31307	8.00504
11102	hsa-miR-410-3p	0.0178571	0.03367	0.0832639	0.087395
42736	hsa-miR-148b-5p	0.198052	0.250842	0.199833	0.221849
11256		0.725649	0.76431	1.53206	1.3042
46248		0.00324675	N/A	0.00666112	0.00672269
11005	hsa-miR-204-5p	0.512987	1.02189	0.641132	0.89916
46266	hsa-miR-1825	0.118506	0.185185	0.219817	0.236975
31349	hsa-miR-524-3p	0.0746753	0.0252525	N/A	N/A
46734		0.183442	0.292929	0.261449	0.25042
10986	hsa-miR-193a-3p	0.167208	0.210438	0.223147	0.240336
17391	hsa-miR-635	0.12987	0.119529	0.246461	0.290756
42796		N/A	N/A	N/A	N/A
42858		0.0162338	0.0505051	0.0216486	0.0453782
46623	hsa-miR-1273a	0.0324675	0.0673401	0.196503	0.163025
18739	hsa-miR-186-5p	0.551948	0.545455	0.697752	0.705882
42451	hsa-miR-139-3p	N/A	N/A	N/A	0.00336134
17394		N/A	N/A	N/A	N/A
42790		N/A	N/A	N/A	0.010084
25117		N/A	N/A	N/A	N/A
17863	hsa-miR-934	1.79708	1.88384	1.21399	1.2
42509	hsa-miR-219a-5p	N/A	0.003367	N/A	0.0168067
42929	hsa-miR-25-5p	2.61526	4.08754	2.41132	1.82689
5730		0.238636	0.222222	0.254788	0.181513
42682	hsa-miR-25-3p	26.3003	48.2239	31.8684	42.521
11168	hsa-miR-520d-3p	N/A	N/A	N/A	N/A
17854	hsa-miR-106b-3p	3.13149	5.75926	4.29142	7.50588
14279	hsa-miR-362-5p	N/A	N/A	N/A	N/A
14300	hsa-miR-29c-5p	N/A	N/A	N/A	0.0151261
17460	hsa-miR-657	0.506494	0.577441	0.383014	0.436975
17853	hsa-miR-30d-3p	0.0568182	0.0572391	0.0699417	0.0571429
46390		4.29221	6.1431	5.23897	5.14454
42868		1.0211	0.639731	0.432973	0.351261
27571		3.17045	4.03704	0.701082	0.759664
42751		0.522727	0.390572	0.134888	0.163025
42752		0.0422078	0.0387205	0.0799334	0.0403361
10998	hsa-miR-19b-3p	5.81656	10.1296	8.00666	10.3311
17530	hsa-miR-641	0.0113636	0.0252525	0.00999167	0.0184874
42869	hsa-miR-936	5.00487	8.73737	4.32639	3.58655
42447	hsa-miR-556-3p	0.38961	0.744108	0.457952	0.57479
17511		0.375	1.63973	3.53872	3.57983
46258	hsa-miR-1184	0.0194805	0.010101	0.206495	0.196639
146122	hsa-miR-2053	N/A	N/A	N/A	N/A
146000	hsa-miR-1911-5p	N/A	N/A	N/A	N/A
24136	spike_control_v2_12	5.27922	8.41077	6.61282	10.879
46202	5S_rRNA	0.688312	1.27441	1.27394	1.66387
146042	hsv1-miR-H8-3p	3.91558	3.6229	3.93006	3.4958
25593	spike_control_v2_18	0.521104	0.944444	0.779351	1.23193
13417	spike_control_v2_8	0.298701	0.43266	0.451291	0.52437
145662		N/A	N/A	N/A	N/A
146065		N/A	N/A	N/A	N/A
146035	hsv1-miR-H2-5p	0.00649351	0.0639731	0.101582	0.119328
5740		64.2873	92.9933	66.6278	79.4504
146093		0.118506	0.442761	0.318068	0.265546
146191		0.0194805	N/A	N/A	N/A
146070		N/A	N/A	N/A	N/A
146108		N/A	N/A	N/A	N/A
146194		0.0892857	0.112795	0.1199	0.12437
146102		0.358766	0.656566	2.50458	2.00672
145968	hsa-let-7d-5p	12.5292	17.3232	13.4155	13.2555
145689	hsa-miR-543	N/A	N/A	N/A	N/A
146115	hsa-miR-940	2.71591	2.7037	3.08909	2.97983
145714	hsa-miR-28-3p	0.0762987	0.112795	0.336386	0.312605
146178	hsa-miR-502-3p	N/A	0.0117845	0.0766028	0.0890756
147963		1.29708	1.39394	1.60866	1.51597
147867	hsa-miR-3118	N/A	N/A	0.00999167	0.0184874
147841	kshv-miR-K12-11-5p	N/A	N/A	N/A	N/A
147925	hsa-miR-3126-5p	0.0616883	0.255892	0.799334	0.717647
147853		9.06981	11.6431	11.2656	7.82185
147588	hsa-miR-4288	1.38474	1.73064	1.64363	1.90756
147649	hsa-miR-500a-5p/hsa-miR-500b-5p	N/A	N/A	N/A	N/A
147977	hsa-miR-3190-3p	0.0665584	0.037037	0.0249792	0.0134454
147857	hsa-miR-3130-5p	0.194805	0.400673	0.454621	0.495798
147569	hsa-miR-4256	N/A	N/A	0.111574	0.087395
147616	hsa-miR-4291	2.25162	2.80471	2.23147	3.2521
147815	hsv1-miR-H14-5p	N/A	N/A	N/A	0.00672269
147858		1.64935	1.14478	0.919234	0.645378
147592		2.46591	2.03199	2.25978	2.03529
148247	hsa-miR-2355-3p	0.125	0.188552	0.17985	0.215126
148072	hsa-miR-3668	0.0487013	0.144781	0.118235	0.163025
147997	hsa-miR-3934-5p	0.00811688	N/A	N/A	0.00504202
147682	hsv1-miR-H6-5p	1.29058	1.94444	0.686095	0.556303
148189	hsa-miR-3681-3p	0.563312	0.624579	0.5995	0.364706
148393	hsa-miR-676-3p	0.430195	0.755892	0.511241	0.937815
148379	hsa-miR-3654	0.464286	0.734007	1.39217	1.4084
147415	hsa-miR-495-5p	0.310065	0.577441	0.541216	0.527731
148165	hsa-miR-3605-5p	N/A	N/A	0.0133222	0.00336134
148675		0.612013	0.727273	0.712739	0.662185
147366		0.12987	0.203704	0.291424	0.272269
10904	spike_control_v1_d	0.0113636	0.0286195	0.00333056	0.00336134
148405		N/A	N/A	N/A	N/A
14262	spike_control_v1_f	N/A	N/A	N/A	N/A
148032	hsa-miR-3685	0.147727	0.148148	0.114904	0.105882
148207		0.0357143	0.0656566	0.199833	0.255462
148416		0.266234	0.191919	0.198168	0.154622
148559	hsa-miR-411-3p	0.00162338	0.0707071	0.329725	0.25042
148233		0.0941558	0.0942761	0.159867	0.260504
148121		0.287338	0.132997	0.214821	0.184874
148201		1.36688	0.818182	0.389675	0.30084
148535		0.0909091	0.180135	0.129892	0.147899
148574		N/A	N/A	N/A	0.00168067
148173		N/A	N/A	0.0666112	0.0739496
148257		0.0211039	0.127946	0.124896	0.156303
148587		N/A	N/A	N/A	N/A
148676		0.233766	0.29798	0.293089	0.289076
148050		0.163961	0.141414	0.219817	0.184874
148278	hsa-miR-138-2-3p	0.0422078	0.0572391	0.101582	0.112605
148426		0.189935	0.227273	0.371357	0.411765
148046		N/A	N/A	N/A	N/A
148448		0.238636	0.56734	1.2373	1.11092
148494		N/A	N/A	N/A	0.00336134
148354		0.26461	0.301347	0.363031	0.354622
148336		0.319805	0.484848	2.25978	2.27563
148446		2.39286	1.10101	1.12073	0.512605
148632		2.16071	1.78114	1.57202	0.798319
148220		0.323052	0.353535	0.301415	0.312605
148498		0.48539	0.311448	0.149875	0.110924
148364		0.426948	0.260943	0.109908	0.0789916
148427		0.0438312	0.164983	0.0782681	0.12437
148313		N/A	N/A	N/A	N/A
17327	hsa-miR-630	0.769481	0.782828	0.477935	0.468908
17488	kshv-miR-K12-6-3p	2.32143	1.29798	1.57702	0.678992
46207		0.344156	0.356902	0.0316403	0.0436975
42813		N/A	N/A	N/A	0.00336134
17936	hsa-miR-16-1-3p	N/A	N/A	N/A	N/A
168897	hsa-miR-5187-5p	0.00649351	0.037037	0.171524	0.12437
168882	hsa-miR-664b-3p	0.332792	0.503367	0.393006	0.453782
168710	hsa-miR-4536-5p	N/A	N/A	N/A	N/A
168590	hsa-miR-4520-5p	0.0454545	0.0656566	0.0865945	0.0789916
168728	hsa-miR-4641	0.288961	0.247475	0.457952	0.304202
168719	hsa-miR-4495	N/A	N/A	N/A	N/A
168785	hsa-miR-520d-5p	0.25487	0.148148	0.0399667	0.0319328
168615	hsa-miR-4655-3p	0.202922	0.255892	0.344713	0.351261
168781	hsa-miR-4776-3p	N/A	N/A	0.00166528	0.0218487
168782	hsa-miR-5093	0.0146104	0.00673401	0.0283097	0.0235294
168820	hsa-miR-4711-5p	N/A	0.003367	N/A	N/A
168750	hsa-miR-4645-5p	0.209416	0.314815	0.294754	0.317647
168921	hsa-miR-4718	N/A	N/A	N/A	0.010084
168759	hsa-miR-3689f	N/A	N/A	N/A	N/A
168962	hsa-miR-548ab	N/A	N/A	0.00666112	0.0201681
168666	hsa-miR-4659a-5p	0.353896	0.565657	0.414654	0.50084
168955	hsa-miR-4756-3p	0.0324675	0.0420875	0.05995	0.0773109
168703	hsa-miR-4716-3p	0.894481	1.99663	1.18568	0.981513
168663	hsa-miR-4442	0.482143	0.367003	0.256453	0.205042
168779	hsa-miR-4797-3p	N/A	N/A	N/A	N/A
169102	hsa-miR-4639-3p	1.44156	1.80303	1.23397	1.88235
169285	hsa-miR-4467	3.90097	3.5	4.29808	2.48403
169249	hsa-miR-4482-5p	N/A	N/A	0.0316403	0.0436975
168993	hsa-miR-4799-3p	N/A	N/A	0.0549542	0.0252101
169011	hsa-miR-4801	N/A	0.003367	0.0233139	0.0218487
169049	hsa-miR-3162-3p	0.530844	0.70202	0.809326	0.763025
169001	hsa-miR-4670-5p	N/A	N/A	0.00999167	0.0235294
169039	hsa-miR-4782-3p	N/A	N/A	N/A	0.00840336
169181	hsa-miR-5191	0.506494	0.816498	0.662781	0.687395
169379	hsa-miR-4694-3p	0.159091	0.13468	0.313072	0.32437
169232	hsa-miR-3156-3p	0.409091	0.558923	0.631141	0.739496
169046	hsa-miR-4715-5p	N/A	N/A	0.029975	0.0319328
169275	hsa-miR-548aq-3p	N/A	N/A	N/A	N/A
169245	hsa-miR-2467-3p	0.287338	0.400673	0.399667	0.336134
169038	hsa-miR-488-3p	0.0146104	0.010101	N/A	0.0184874
169240	hsa-miR-3944-5p	N/A	N/A	N/A	N/A
169115	hsa-miR-450a-2-3p	1.17045	0.890572	0.201499	0.196639
169287	hsa-miR-548as-5p	N/A	N/A	N/A	N/A
169361	hsa-miR-4481	N/A	N/A	0.0133222	0.0319328
169225	hsa-miR-640	0.00487013	N/A	N/A	N/A
46219		1.07143	1.15152	1.30225	1.28908
168787		1.06169	1.1431	1.1174	0.895798
169373		3.15584	2.90909	3.00083	2.7563
[truncated: 1,547 more rows]
