# Supplementary material for: Analysis of microRNA expression profiles in exosomes derived from acute myeloid leukemia by p62 knockdown and effect on angiogenesis
Source: PeerJ journal article supplement (doi:10.7717/peerj.13498), 2022-07-22
Supplement: miRNA.zip [file All Differentially Expressed miRNAs.xlsx]

## Sheet: Cont_drug vs Cont
# Condition pairs: Cont_drug vs Cont # Fold Change cut-off: 2.0 # Column "ID": array ID of the probes, each miRNA always has its unique probe, but some miRNAs may have two different probes. # Column "Name": the name of each miRNA. # Column "Fold change": the ratio of normalized intensities between two conditions (use normalized data, ratio scale). # Column "ForeGround": the foreground intensity o…
Cont_drug vs Cont 2.0 fold up regulated miRNAs
		Fold change	ForeGround		ForeGround-BackGround		Normalized
ID	Name	Cont_drug vs Cont	Cont	Cont_drug	Cont	Cont_drug	Cont	Cont_drug
42810	hsa-miR-149-5p	4.92593	69	91	8	38	0.025974	0.127946
42485	ebv-miR-BART10-5p	2.14438	91	114	29.5	61	0.0957792	0.205387
46633	hsa-miR-1267	2.39777	485.5	1033.5	424.5	981.5	1.37825	3.30471
42896	hsa-miR-450b-5p	2.19192	83.5	99	22	46.5	0.0714286	0.156566
169170	hsa-miR-4472	2.73364	1078	2731.5	1016.5	2679.5	3.30032	9.02189
147845	hsa-miR-3173-3p	2.25037	165.5	270	100	217	0.324675	0.73064
168742	hsa-miR-4722-3p	2.16835	81	90	16.5	34.5	0.0535714	0.116162
42524	hsa-miR-21-3p	2.35963	96	131	34.5	78.5	0.112013	0.26431
168602	hsa-miR-4666a-3p	3.06052	103.5	175	41	121	0.133117	0.407407
168621	hsa-miR-4796-5p	2.36062	100	139.5	38	86.5	0.123377	0.291246
169265	hsa-miR-4733-3p	3.22143	110	198.5	47	146	0.152597	0.491582
42496	hsa-miR-181c-5p	4.14815	69.5	83	7.5	30	0.0243506	0.10101
42897	ebv-miR-BART15	2.30741	84	98	20	44.5	0.0649351	0.149832
10990	hsa-miR-196a-5p	2.12521	1217.5	2421.5	1156	2369	3.75325	7.97643
145705	hsa-miR-431-5p	2.03626	2652.5	5141.5	2591.5	5088.5	8.41396	17.133
147608	hsa-miR-4307	2.55502	97.5	138.5	34.5	85	0.112013	0.286195
148627	hsa-miR-615-5p	3.22963	78	107	17.5	54.5	0.0568182	0.183502
17886	hsa-miR-301b-3p	7.01525	69.5	110.5	8.5	57.5	0.0275974	0.193603
168611	hsa-miR-4753-3p	2.13599	95.5	123	33.5	69	0.108766	0.232323
46789	hsa-miR-513b-5p	3.53153	84.5	117.5	18.5	63	0.0600649	0.212121
46863	hsa-miR-3157-3p	2.86994	86.5	114.5	21.5	59.5	0.0698052	0.200337
168919	hsa-miR-4456	2.51975	1387	3263.5	1320.5	3208.5	4.28734	10.803
33902	hsa-miR-128-3p	2.76543	100.5	157	39	104	0.126623	0.350168
32608	hsa-miR-761	2.2002	100.5	132.5	37	78.5	0.12013	0.26431
42666	hsa-miR-26a-2-3p	2.70641	83.5	105.5	20.5	53.5	0.0665584	0.180135
10964	hsa-miR-155-5p	2.04549	315	554	254	501	0.824675	1.68687
148289	hsa-miR-3675-5p	2.3581	140.5	232	78.5	178.5	0.25487	0.60101
168995	hsa-miR-4791	2.19863	241	432.5	179	379.5	0.581169	1.27778
42446	hsa-miR-576-5p	2.44205	78.5	89	15.5	36.5	0.0503247	0.122896
33596	hsa-miR-126-5p	2.95842	142.5	285.5	81.5	232.5	0.26461	0.782828
168952	hsa-miR-4781-3p	2.1319	331	606.5	269	553	0.873377	1.86195
168727	hsa-miR-4426	3.60832	208	561.5	146	508	0.474026	1.71044
169139	hsa-miR-5192	2.28381	151	249.5	89	196	0.288961	0.659933
46869	hsa-miR-1258	2.29264	176	301.5	111.5	246.5	0.362013	0.829966
146196	hsa-miR-711	2.06174	3261	6408	3194	6350	10.3701	21.3805
168593	hsa-miR-4726-3p	2.97585	78	88	11.5	33	0.0373377	0.111111
169079	hsa-miR-4667-5p	2.89641	1700	4622.5	1635	4566.5	5.30844	15.3754
29802	hsa-miR-144-3p	2.28551	114	166	51.5	113.5	0.167208	0.382155
145746	hsa-let-7i-3p	2.03419	88.5	104.5	26	51	0.0844156	0.171717
168973	hsa-miR-1268b	2.0466	137	203	75.5	149	0.24513	0.501684
147925	hsa-miR-3126-5p	4.14815	81.5	129	19	76	0.0616883	0.255892
147857	hsa-miR-3130-5p	2.05679	124	173	60	119	0.194805	0.400673
148072	hsa-miR-3668	2.97284	76.5	97	15	43	0.0487013	0.144781
168703	hsa-miR-4716-3p	2.23217	338.5	646	275.5	593	0.894481	1.99663
42672	hsa-miR-323b-5p	2.07237	6467	12850	6401	12791.5	20.7825	43.069
169271	hsa-miR-4784	2.02282	541	986	475.5	927.5	1.54383	3.1229
10947	hsa-miR-142-3p	2.23099	139	217	76	163.5	0.246753	0.550505
14328	hsa-miR-124-3p	3.42222	72	86.5	10	33	0.0324675	0.111111
11011	hsa-miR-211-5p	2.47293	102.5	146.5	39	93	0.126623	0.313131
147885	kshv-miR-K12-5-5p	2.00051	569.5	1033	507.5	979	1.64773	3.2963
9938	hsa-let-7i-5p	2.07556	15384.5	30721.5	15323	30668	49.75	103.259
21498	hsa-miR-654-3p	3.16717	79.5	108.5	18.5	56.5	0.0600649	0.190236
17402	ebv-miR-BART2-5p	3.02093	73.5	86.5	11.5	33.5	0.0373377	0.112795
29575	hsa-miR-32-3p	2.03939	2962.5	5757	2900.5	5704	9.41721	19.2054
146114	hsa-miR-1538	3.57778	82	121.5	20	69	0.0649351	0.232323
145820	hsa-let-7c-5p	2.51051	4887.5	11736.5	4826	11683	15.6688	39.3367
148156	hsa-miR-3686	2.03252	361.5	640	299.5	587	0.972403	1.97643
17578	kshv-miR-K12-5-3p	2.17314	1035	2093	973.5	2040	3.16071	6.86869
169145	hsa-miR-5000-3p	2.85523	560.5	1424	498.5	1372.5	1.61851	4.62121
46335	hsa-miR-548m	3.87929	91.5	154.5	27	101	0.0876623	0.340067
10946	hsa-miR-141-3p	2.60741	80.5	98	17.5	44	0.0568182	0.148148
146169	mcv-miR-M1-3p	4.81185	75	112	12.5	58	0.0405844	0.195286
147162	hsa-let-7a-5p	2.05297	7140	14064	7077	14010	22.9773	47.1717
148418	hsa-miR-3607-5p	3.65037	76	98	12.5	44	0.0405844	0.148148
168953	hsa-miR-4704-5p	2.22417	100.5	136	38	81.5	0.123377	0.274411
168864	hsa-miR-320d	2.11916	246.5	430	184	376	0.597403	1.26599
169322	hsa-miR-4534	2.14215	1436.5	2887.5	1371	2832	4.4513	9.53535
147667	hsa-miR-3182	2.22463	8090.5	17276	8028	17221.5	26.0649	57.9848
147856	hsa-miR-3200-3p	2.1597	117	168.5	54.5	113.5	0.176948	0.382155
147806	hsa-miR-3149	2.66696	831.5	2035	770.5	1981.5	2.50162	6.67172
148509	hsa-miR-328-5p	3.58795	3118.5	10621.5	3054.5	10568	9.91721	35.5825
168639	hsa-miR-4533	2.06912	272	472.5	209.5	418	0.680195	1.40741
169015	hsa-miR-4454	2.0283	1874	3600	1812.5	3545	5.88474	11.936
Cont_drug vs Cont 2.0 fold down regulated miRNAs
		Fold change	ForeGround		ForeGround-BackGround		Normalized
ID	Name	Cont_drug vs Cont	Cont	Cont_drug	Cont	Cont_drug	Cont	Cont_drug
46752	hsa-miR-1270	0.494358	200.5	118.5	139.5	66.5	0.452922	0.223906
46411	hsa-miR-1203	0.461874	181	105.5	119	53	0.386364	0.178451
145690	hsa-miR-512-5p	0.461695	133.5	85	73	32.5	0.237013	0.109428
148231	hsa-miR-3918	0.448068	245.5	131	184	79.5	0.597403	0.267677
168766	hsa-miR-4772-5p	0.375738	96	65	34.5	12.5	0.112013	0.0420875
46750	hsa-miR-1254	0.331852	103	67.5	37.5	12	0.121753	0.040404
27551	hsa-miR-612	0.456002	133	84	70.5	31	0.228896	0.104377
14285	hsa-miR-487b-3p	0.448448	98	69.5	37	16	0.12013	0.0538721
146168	hsa-miR-1912	0.408015	93	64.5	30.5	12	0.099026	0.040404
147830	hsv1-miR-H18	0.480042	203.5	118	141.5	65.5	0.459416	0.220539
148669	hsa-miR-185-3p	0.263374	93	60.5	31.5	8	0.102273	0.026936
148677	hsa-miR-637	0.362708	163.5	88.5	101.5	35.5	0.329545	0.119529
148474	hsa-miR-3622a-5p	0.365791	199	101	137.5	48.5	0.446429	0.1633
168679	hsa-miR-4763-3p	0.460274	243.5	134	182.5	81	0.592532	0.272727
168718	hsa-miR-4684-3p	0.479951	123	80.5	60.5	28	0.196429	0.0942761
168755	hsa-miR-4479	0.453704	141.5	87.5	80	35	0.25974	0.117845
169112	hsa-miR-4727-3p	0.482343	105	72	43	20	0.13961	0.0673401
46556	hsa-miR-623	0.304666	152	80.5	88.5	26	0.287338	0.0875421
46744	hsa-miR-526b-5p	0.368327	210.5	108.5	145	51.5	0.470779	0.173401
169194	hsa-miR-4513	0.485984	320	174.5	255	119.5	0.827922	0.402357
169126	hsa-miR-4486	0.36576	426	182.5	361.5	127.5	1.1737	0.429293
46762	hsa-miR-3928-3p	0.445028	190.5	108	127	54.5	0.412338	0.183502
17563	hsa-miR-644a	0.384707	124	77	62	23	0.201299	0.0774411
147564	hsa-miR-4266	0.452525	118.5	77	55	24	0.178571	0.0808081
169138	hsa-miR-4504	0.401735	118	76	55.5	21.5	0.180195	0.0723906
168928	hsa-miR-4431	0.340401	195.5	97.5	131	43	0.425325	0.144781
42562	hsa-miR-105-3p	0.263374	93.5	61.5	31.5	8	0.102273	0.026936
147772	hsa-miR-4303	0.482582	114.5	79	50.5	23.5	0.163961	0.0791246
147389	hsa-miR-3691-5p	0.220789	140	71	77.5	16.5	0.251623	0.0555556
168578	hsa-miR-5190	0.426226	217	117.5	154.5	63.5	0.501623	0.213805
169162	hsa-miR-5691	0.393359	135.5	81	72.5	27.5	0.23539	0.0925926
169088	hsa-miR-4492	0.429119	121.5	78	58	24	0.188312	0.0808081
45936	hsa-miR-1292-5p	0.276543	95.5	62.5	30	8	0.0974026	0.026936
42954	ebv-miR-BART7-5p	0.445926	116	78	50	21.5	0.162338	0.0723906
46738	hsa-miR-1182	0.259259	94.5	63.5	30	7.5	0.0974026	0.0252525
146052	hsa-miR-1471	0.398401	414.5	190	347.5	133.5	1.12825	0.449495
145762	hsa-miR-549a	0.30727	146	79.5	81	24	0.262987	0.0808081
147967	hsa-miR-3180/hsa-miR-3180-3p	0.420114	203	111	137	55.5	0.444805	0.186869
46274	hsa-miR-3187-3p	0.110913	158	65.5	93.5	10	0.303571	0.03367
148514	hsa-miR-365a-5p	0.368906	192.5	101.5	126.5	45	0.410714	0.151515
169288	hsa-miR-4730	0.307185	289.5	123	224.5	66.5	0.728896	0.223906
169387	hsa-miR-5703	0.450292	103.5	74.5	38	16.5	0.123377	0.0555556
28950	hsa-miR-455-3p	0.405797	96.5	67.5	34.5	13.5	0.112013	0.0454545
42556	hsa-miR-889-3p	0.39596	147	86	82.5	31.5	0.267857	0.106061
17444	hsa-miR-632	0.392392	100	67.5	37	14	0.12013	0.047138
148006	hsa-miR-4315	0.459818	115.5	77.5	53	23.5	0.172078	0.0791246
147670	hsa-miR-3177-3p	0.41816	124.5	78.5	62	25	0.201299	0.0841751
169224	hsa-miR-4440	0.348444	125.5	74.5	62.5	21	0.202922	0.0707071
46222	hsa-miR-1228-5p	0.348023	211	102.5	147.5	49.5	0.478896	0.166667
147923	hsa-miR-3142	0.464345	161	98	100.5	45	0.326299	0.151515
168818	hsa-miR-4774-5p	0.0696823	189	62	126.5	8.5	0.410714	0.0286195
169214	hsa-miR-4638-5p	0.450867	1262	575	1199.5	521.5	3.89448	1.75589
17653	hsa-miR-133a-5p	0.204586	139	71	73.5	14.5	0.238636	0.0488215
42692	hsa-miR-127-5p	0.345679	348	151	282	94	0.915584	0.316498
42887	hsa-miR-331-3p	0.195667	119.5	66.5	53	10	0.172078	0.03367
146044	hsa-miR-2115-5p	0.236715	111	66	46	10.5	0.149351	0.0353535
17820	hsa-miRPlus-C1066	0.259259	200	88.5	132	33	0.428571	0.111111
147798	hsa-miR-3141	0.454432	111.5	78.5	44.5	19.5	0.144481	0.0656566
148666	hsa-miR-938	0.160781	131.5	66.5	64.5	10	0.209416	0.03367
148262	hsa-miR-3680-3p	0.159859	194	73.5	126.5	19.5	0.410714	0.0656566
147268	hsa-miR-3940-3p	0.231808	109	67.5	42.5	9.5	0.137987	0.0319865
148338	hsa-miR-3064-3p	0.120988	95.5	60	30	3.5	0.0974026	0.0117845
146157	hsv1-miR-H4-5p	0.472075	878.5	427	815	371	2.6461	1.24916
146123	hsv1-miR-H2-3p	0.435374	237.5	125.5	171.5	72	0.556818	0.242424
168802	hsa-miR-4516	0.482155	259	146	192.5	89.5	0.625	0.301347
168815	hsa-miR-4488	0.417599	214.5	115	149	60	0.483766	0.20202
168582	hsa-miR-4731-5p	0.209877	107.5	63.5	42	8.5	0.136364	0.0286195
168991	hsa-miR-873-3p	0.144557	147.5	67	82.5	11.5	0.267857	0.0387205
168979	hsa-miR-4734	0.222222	171.5	78.5	105	22.5	0.340909	0.0757576
42674	hsa-miR-431-3p	0.23569	95.5	61.5	33	7.5	0.107143	0.0252525
147894	hsa-miR-3137	0.470307	326.5	173.5	263.5	119.5	0.855519	0.402357
168886	hsa-miR-4745-5p	0.259259	107.5	65.5	44	11	0.142857	0.037037
168562	hsa-miR-4738-3p	0.331852	140.5	78.5	75	24	0.243506	0.0808081
169094	hsa-miR-4482-3p	0.44325	127.5	82	62	26.5	0.201299	0.0892256
169089	hsa-miR-4470	0.309117	114	71.5	52	15.5	0.168831	0.0521886
169161	hsa-miR-4489	0.122004	114.5	60.5	51	6	0.165584	0.020202
46272	hsa-miR-1200	0.497187	377.5	203	316	151.5	1.02597	0.510101
147797	hsa-miR-4260	0.44266	352	176	290.5	124	0.943182	0.417508
147838	hsa-miR-3194-5p	0.243167	136	69.5	72.5	17	0.23539	0.0572391
168911	hsa-miR-4682	0.467216	344.5	178.5	283	127.5	0.918831	0.429293
168947	hsa-miR-3975	0.283718	115	67.5	53	14.5	0.172078	0.0488215
168757	hsa-miR-4713-3p	0.385874	105.5	69	43	16	0.13961	0.0538721
17546	hsa-miR-585-3p	0.407516	236.5	122.5	170.5	67	0.553571	0.225589
17377	hsa-miR-600	0.284847	602.5	203.5	537	147.5	1.74351	0.496633
42739	hsa-miR-339-5p	0.283775	663.5	221	597.5	163.5	1.93994	0.550505
46614	hsa-miR-1323	0.209468	518.5	144	453	91.5	1.47078	0.308081
11111	hsa-miR-432-5p	0.340633	203	105	137	45	0.444805	0.151515
42969	hsa-miR-10b-3p	0.122004	125.5	64.5	59.5	7	0.193182	0.023569
42466	ebv-miR-BART18-3p	0.417944	296	148.5	232	93.5	0.753247	0.314815
42747	hsa-miR-93-3p	0.0230453	110.5	57	45	1	0.146104	0.003367
42800	hsa-miR-582-5p	0.47695	184.5	111.5	118.5	54.5	0.38474	0.183502
42827	hsa-miR-652-3p	0.388889	154	90.5	88	33	0.285714	0.111111
42661	hsa-miR-492	0.418701	359	171.5	293.5	118.5	0.952922	0.39899
11140	hsa-miR-508-3p	0.291667	177.5	88	112	31.5	0.363636	0.106061
146107	hsa-miR-762	0.212726	162.5	75.5	97.5	20	0.316558	0.0673401
145995	hsa-miR-196b-3p	0.415564	204	112	138.5	55.5	0.449675	0.186869
146029	hsa-miR-365b-5p	0.393147	1161	469.5	1096	415.5	3.55844	1.39899
147792	hsa-miR-3165	0.256279	152	75	87	21.5	0.282468	0.0723906
147632	hsa-miR-4297	0.456296	103.5	72.5	37.5	16.5	0.121753	0.0555556
147917	hsa-miR-3151-5p	0.148148	121.5	64.5	56	8	0.181818	0.026936
147860	hsv1-miR-H16	0.0510018	95.5	56.5	30.5	1.5	0.099026	0.00505051
148288	hsa-miR-550b-3p	0.490641	111	77.5	46.5	22	0.150974	0.0740741
148346	hsa-miR-3929	0.214171	110.5	65	46	9.5	0.149351	0.0319865
148059	hsa-miR-493-5p	0.0583763	217	65.5	151	8.5	0.49026	0.0286195
42570	hsa-miR-194-3p	0.317233	624	225.5	559	171	1.81494	0.575758
42620	hsa-miR-188-5p	0.0873294	113	58	47.5	4	0.154221	0.013468
168819	hsa-miR-200a-3p	0.355556	136	80.5	70	24	0.227273	0.0808081
168836	hsa-miR-4496	0.259259	222	95	156	39	0.506494	0.131313
168972	hsa-miR-5004-3p	0.111837	116.5	63	51	5.5	0.165584	0.0185185
168866	hsa-miR-4771	0.158192	153.5	69	88.5	13.5	0.287338	0.0454545
169296	hsa-miR-5004-5p	0.272669	297	114	232	61	0.753247	0.205387
169378	hsa-miR-4430	0.146652	114.5	62	49.5	7	0.160714	0.023569
169223	hsa-miR-4680-3p	0.456541	660	318	594	261.5	1.92857	0.880471
169017	hsa-miR-197-5p	0.392179	261.5	131	197	74.5	0.63961	0.250842
169345	hsa-miR-5008-5p	0.260812	147.5	76.5	83.5	21	0.271104	0.0707071
169388	hsa-miR-663a	0.250007	752	218.5	686.5	165.5	2.2289	0.557239
168832	hsa-miR-4674	0.287903	239	103.5	176.5	49	0.573052	0.164983
169219	hsa-miR-5591-5p	0.392271	178	97	115	43.5	0.373377	0.146465

## Sheet: P62_drug vs P62
# Condition pairs: P62_drug vs P62 # Fold Change cut-off: 2.0 # Column "ID": array ID of the probes, each miRNA always has its unique probe, but some miRNAs may have two different probes. # Column "Name": the name of each miRNA. # Column "Fold change": the ratio of normalized intensities between two conditions (use normalized data, ratio scale). # Column "ForeGround": the foreground intensity of …
P62_drug vs P62 2.0 fold up regulated miRNAs
		Fold change	ForeGround		ForeGround-BackGround		Normalized
ID	Name	P62_drug vs P62	P62	P62_drug	P62	P62_drug	P62	P62_drug
148434	hsa-miR-3692-3p	2.09201	130.5	207	75.5	156.5	0.251457	0.52605
145670	hsa-miR-18b-5p	2.07736	110	171	60	123.5	0.199833	0.415126
169137	hsa-miR-4524b-5p	3.55429	63	92	11.5	40.5	0.0383014	0.136134
42497	hcmv-miR-UL70-5p	2.48947	64.5	83	15	37	0.0499584	0.12437
P62_drug vs P62 2.0 fold down regulated miRNAs
		Fold change	ForeGround		ForeGround-BackGround		Normalized
ID	Name	P62_drug vs P62	P62	P62_drug	P62	P62_drug	P62	P62_drug
168861	hsa-miR-4754	0.456816	146.5	90.5	95	43	0.316403	0.144538
147203	hsa-miR-302a-3p	0.437637	110.5	79	56.5	24.5	0.188177	0.0823529
11141	hsa-miR-509-3p	0.479136	101.5	73.5	49.5	23.5	0.164863	0.0789916
168558	hsa-miR-5585-3p	0.378466	87	62	36	13.5	0.1199	0.0453782
169289	hsa-miR-4692	0.475354	551.5	285	500	235.5	1.66528	0.791597
27551	hsa-miR-612	0.193525	294	95	242.5	46.5	0.80766	0.156303
168572	hsa-miR-4507	0.416886	504	235	451.5	186.5	1.50375	0.626891
169169	hsa-miR-5684	0.457822	301	161.5	248	112.5	0.825978	0.378151
42717	hsa-miR-92b-5p	0.42791	958.5	434	904.5	383.5	3.01249	1.28908
42522	ebv-miR-BART19-3p	0.465805	105	77	52	24	0.173189	0.0806723
169126	hsa-miR-4486	0.471423	282	158.5	228	106.5	0.759367	0.357983
27541	hcmv-miR-UL70-3p	0.463505	118	80.5	67.5	31	0.224813	0.104202
146089	hsv1-miR-H8-5p	0.353532	817.5	318	766.5	268.5	2.55287	0.902521
147884	hsv2-miR-H25	0.387969	245	124.5	192.5	74	0.641132	0.248739
11121	hsa-miR-489-3p	0.359352	117.5	70.5	66	23.5	0.219817	0.0789916
168928	hsa-miR-4431	0.313339	192.5	94	138.5	43	0.461282	0.144538
169399	hsa-miR-4750-5p	0.452189	734.5	357	678.5	304	2.25978	1.02185
147804	hsv1-miR-H17	0.338719	124.5	75.5	73	24.5	0.243131	0.0823529
169088	hsa-miR-4492	0.169978	99	58.5	47.5	8	0.158201	0.0268908
17488	kshv-miR-K12-6-3p	0.430554	522	245.5	473.5	202	1.57702	0.678992
17752	hsa-let-7f-5p	0.391464	1619.5	660	1567.5	608	5.22065	2.0437
169028	hsa-miR-4708-3p	0.475855	473	254	421	198.5	1.40216	0.667227
168978	hsa-miR-371b-5p	0.488256	231	133	185	89.5	0.616153	0.30084
168925	hsa-miR-1273g-3p	0.270964	177.5	84	128.5	34.5	0.427977	0.115966

## Sheet: Cont vs P62
# Condition pairs: Cont vs P62 # Fold Change cut-off: 2.0 # Column "ID": array ID of the probes, each miRNA always has its unique probe, but some miRNAs may have two different probes. # Column "Name": the name of each miRNA. # Column "Fold change": the ratio of normalized intensities between two conditions (use normalized data, ratio scale). # Column "ForeGround": the foreground intensity of each…
Cont vs P62 2.0 fold up regulated miRNAs
		Fold change	ForeGround		ForeGround-BackGround		Normalized
ID	Name	Cont vs P62	P62	Cont	P62	Cont	P62	Cont
42812	hsa-miR-508-5p	3.57277	250	790	198.5	727.5	0.661116	2.36201
46752	hsa-miR-1270	6.18136	74.5	200.5	22	139.5	0.0732723	0.452922
46411	hsa-miR-1203	29.0014	56.5	181	4	119	0.0133222	0.386364
145838	hsa-miR-125b-1-3p	2.89894	701.5	1987.5	648	1927	2.1582	6.25649
147535	hsa-miR-4309	3.3024	142	362	89	301.5	0.29642	0.978896
148231	hsa-miR-3918	23.916	60	245.5	7.5	184	0.0249792	0.597403
148635	hsa-miR-933	3.27069	227.5	652.5	176	590.5	0.586178	1.91721
168825	hsa-miR-4729	3.58303	221	684.5	169.5	623	0.56453	2.02273
169168	hsa-miR-5580-3p	10.4911	61.5	174.5	10.5	113	0.0349709	0.366883
169335	hsa-miR-4699-5p	3.13153	237	659	186	597.5	0.619484	1.93994
169167	hsa-miR-4451	3.37676	149.5	396.5	97	336	0.323064	1.09091
169386	hsa-miR-4427	5.08611	63	120.5	11.5	60	0.0383014	0.194805
28019	hsa-miR-10a-3p	2.1207	252.5	497	199.5	434	0.664446	1.40909
11181	hsa-miR-95-3p	37.8466	61	394	8.5	330	0.0283097	1.07143
42811	hsa-miR-542-5p	5.92401	66	143	13	79	0.0432973	0.256494
42838	hsa-miRPlus-C1076	3.91185	92.5	222	39	156.5	0.129892	0.508117
147865	hsa-miR-4330	3.08699	68	113	15	47.5	0.0499584	0.154221
148208	hsa-miR-3610	2.60358	174	389.5	121.5	324.5	0.404663	1.05357
148040	hsa-miR-1247-3p	3.26803	105.5	238.5	52.5	176	0.174854	0.571429
148453	hsa-miR-3074-5p	2.5779	141.5	303	90	238	0.29975	0.772727
168799	hsa-miR-4710	3.76555	80.5	161.5	25.5	98.5	0.0849292	0.319805
168673	hsa-miR-4656	2.14578	224	443	171.5	377.5	0.571191	1.22565
168619	hsa-miR-1260b	3.10663	98.5	210	45.5	145	0.15154	0.470779
169241	hsa-miR-5571-3p	5.24395	111	377	58	312	0.193172	1.01299
11159	hsa-miR-518e-3p	2.31147	149	292.5	97	230	0.323064	0.746753
145934	hsa-miRPlus-B1114	2.12381	365	745	313.5	683	1.04413	2.21753
145905	hsa-miR-518a-5p/hsa-miR-527	2.00538	156.5	277	105	216	0.349709	0.701299
169106	hsa-miR-4783-3p	4.38677	71	153	20	90	0.0666112	0.292208
17882	hsa-miR-20b-3p	4.30553	77	168.5	24	106	0.0799334	0.344156
46565	hsa-miR-1207-5p	5.93632	86.5	266	33.5	204	0.111574	0.662338
13130	hsa-miR-517-5p	5.08772	104.5	336.5	52.5	274	0.174854	0.88961
145933	hsa-miR-652-5p	2.28612	110	196.5	56.5	132.5	0.188177	0.430195
145962	hsa-miR-639	8.78952	82.5	336.5	30.5	275	0.101582	0.892857
147938	hsa-miR-4287	2.86483	76.5	135.5	24.5	72	0.0815987	0.233766
147830	hsv1-miR-H18	12.54	63.5	203.5	11	141.5	0.0366361	0.459416
148669	hsa-miR-185-3p	4.38677	58.5	93	7	31.5	0.0233139	0.102273
148474	hsa-miR-3622a-5p	26.808	57.5	199	5	137.5	0.0166528	0.446429
147318	hsa-miR-3660	2.74448	273.5	687	222	625	0.739384	2.02922
168684	hsa-miR-5010-5p	2.09802	75	110.5	23	49.5	0.0766028	0.160714
168679	hsa-miR-4763-3p	7.26155	77	243.5	24.5	182.5	0.0815987	0.592532
168718	hsa-miR-4684-3p	4.36872	66	123	13.5	60.5	0.0449625	0.196429
169118	hsa-miR-5009-3p	4.78726	131.5	446.5	78.5	385.5	0.261449	1.25162
168987	hsa-miR-4523	6.19309	69.5	170	17	108	0.0566195	0.350649
46744	hsa-miR-526b-5p	40.3861	58.5	210.5	3.5	145	0.011657	0.470779
46622	hsa-miR-518f-5p	5.34807	90	262	36	197.5	0.1199	0.641234
168917	hsa-miR-4511	5.19913	60.5	95.5	6	32	0.0199833	0.103896
169159	hsa-miR-4521	2.71275	187.5	436.5	133.5	371.5	0.444629	1.20617
169194	hsa-miR-4513	3.57674	123.5	320	69.5	255	0.231474	0.827922
27541	hcmv-miR-UL70-3p	2.90285	118	261.5	67.5	201	0.224813	0.652597
147602	hsa-miR-2682-5p	3.2079	137.5	345	86	283	0.286428	0.918831
46762	hsa-miR-3928-3p	247.609	54	190.5	0.5	127	0.00166528	0.412338
169339	hsa-miR-5579-3p	6.59834	253.5	1424	201	1360.5	0.669442	4.41721
42543	hsa-miR-608	6.49037	70.5	188.5	19	126.5	0.0632806	0.410714
42808	hsa-miR-874-3p	2.79385	335	875.5	283.5	812.5	0.944213	2.63799
17353	hsa-miR-609	2.34847	128	247	77	185.5	0.256453	0.602273
29190	hsa-miR-708-5p	6.4955	98	377.5	47.5	316.5	0.158201	1.0276
17623	ebv-miR-BART14-3p	2.01466	81	125	30	62	0.0999167	0.201299
11121	hsa-miR-489-3p	2.31893	117.5	219.5	66	157	0.219817	0.50974
147979	hsa-miR-3150a-3p	3.48964	86	186	34.5	123.5	0.114904	0.400974
147564	hsa-miR-4266	8.93601	58	118.5	6	55	0.0199833	0.178571
148351	hsa-miR-3945	2.62609	77	127	24.5	66	0.0815987	0.214286
148039	hsa-miR-3925-5p	4.94587	86	235	34	172.5	0.113239	0.560065
168631	hsa-miR-4723-5p	3.17079	98.5	215.5	47.5	154.5	0.158201	0.501623
168800	hsa-miR-4724-5p	2.53205	89	163	38.5	100	0.128226	0.324675
168736	hsa-miR-4796-3p	2.9094	823.5	2371	774	2310	2.57785	7.5
169303	hsa-miR-378g	2.56713	1412.5	3650	1362.5	3588	4.53789	11.6494
19588	hsa-miR-17-3p	3.71367	65.5	105	10.5	40	0.0349709	0.12987
145974	hsa-miR-200b-5p	5.80664	65.5	132.5	11.5	68.5	0.0383014	0.222403
147786	hsa-miR-3198	3.97068	94	231	41	167	0.136553	0.542208
148187	hsa-miR-410-5p	2.18986	1541	3407	1487.5	3341.5	4.9542	10.849
168796	hsa-miR-3664-3p	4.34912	762.5	3213	705.5	3147.5	2.34971	10.2192
169238	hsa-miR-4654	2.06326	731.5	1500.5	678	1435	2.25812	4.65909
17418	kshv-miR-K12-4-3p	18.0345	55	119.5	3	55.5	0.00999167	0.180195
17892	hsa-miR-372-5p	2.35199	366	824	315	760	1.04913	2.46753
145789	hsa-miR-550a-3-5p/hsa-miR-550a-5p	2.0343	950	1939	898.5	1875	2.99251	6.08766
145768	hsa-miR-665	2.91985	157	376.5	104.5	313	0.348043	1.01623
147772	hsa-miR-4303	9.84586	56.5	114.5	5	50.5	0.0166528	0.163961
168923	hsa-miR-4688	2.54787	141	293	88	230	0.293089	0.746753
168578	hsa-miR-5190	8.60642	70	217	17.5	154.5	0.0582848	0.501623
168627	hsa-miR-4678	2.4151	395	913.5	343.5	851	1.14405	2.76299
169162	hsa-miR-5691	7.85286	60.5	135.5	9	72.5	0.029975	0.23539
169010	hsa-miR-2681-3p	2.1036	81	124	28.5	61.5	0.0949209	0.199675
168785	hsa-miR-520d-5p	6.37706	59	141.5	12	78.5	0.0399667	0.25487
169115	hsa-miR-450a-2-3p	5.80874	110	424	60.5	360.5	0.201499	1.17045
46215	hsa-miR-1301-3p	2.95025	204	524.5	151.5	458.5	0.50458	1.48864
146072	hsa-miR-1469	2.75043	192.5	462.5	140	395	0.466278	1.28247
146052	hsa-miR-1471	11.1068	83	414.5	30.5	347.5	0.101582	1.12825
145762	hsa-miR-549a	22.5605	56	146	3.5	81	0.011657	0.262987
145716	hsa-miR-671-5p	2.94162	138	324.5	85.5	258	0.284763	0.837662
147967	hsa-miR-3180/hsa-miR-3180-3p	7.63159	70	203	17.5	137	0.0582848	0.444805
56873	hsa-miR-3124-5p	2.27017	87.5	150.5	36.5	85	0.121565	0.275974
148650	hsa-miR-516a-5p	7.31128	68	192.5	17	127.5	0.0566195	0.413961
148514	hsa-miR-365a-5p	7.70731	69	192.5	16	126.5	0.0532889	0.410714
148645	hsa-miR-129-5p	2.02057	80	123.5	27.5	57	0.0915903	0.185065
168609	hsa-miR-5197-3p	5.84903	58.5	102	6	36	0.0199833	0.116883
169357	hsa-miR-4689	5.71759	99	326.5	44.5	261	0.14821	0.847403
169306	hsa-miR-4758-5p	3.06153	795.5	2400.5	743.5	2335	2.47627	7.58117
169288	hsa-miR-4730	9.11879	74.5	289.5	24	224.5	0.0799334	0.728896
169387	hsa-miR-5703	2.96351	65	103.5	12.5	38	0.041632	0.123377
46642	hsa-miR-1276	3.04637	62	100.5	12	37.5	0.0399667	0.121753
42556	hsa-miR-889-3p	3.5744	74	147	22.5	82.5	0.0749376	0.267857
28047	hsa-miR-890	2.04915	76.5	114	24.5	51.5	0.0815987	0.167208
17444	hsa-miR-632	4.24341	59	100	8.5	37	0.0283097	0.12013
147911	hsa-miR-4280	3.44304	75	146	23.5	83	0.0782681	0.269481
148106	hsa-miR-3678-3p	4.08827	115	333	64.5	270.5	0.214821	0.878247
147670	hsa-miR-3177-3p	17.2686	54.5	124.5	3.5	62	0.011657	0.201299
145769	hsa-miR-371a-5p	3.96863	346.5	1267	295.5	1203	0.98418	3.90584
42528	hsa-miR-296-3p	3.99501	157.5	502.5	107	438.5	0.35637	1.4237
168587	hsa-miR-4461	2.19752	81	128	29.5	66.5	0.0982515	0.215909
169224	hsa-miR-4440	10.1546	57	125.5	6	62.5	0.0199833	0.202922
169163	hsa-miR-4685-5p	3.49967	100	243.5	50	179.5	0.166528	0.582792
11073	hsa-miR-34b-5p	2.06784	79.5	132	33	70	0.109908	0.227273
11139	hsa-miR-507	2.64599	71	129.5	24.5	66.5	0.0815987	0.215909
30493	hsa-miR-548a-5p	2.46048	181	402.5	135.5	342	0.451291	1.11039
42898	hsa-miR-124-5p	5.18958	64	153.5	17	90.5	0.0566195	0.293831
42609	hsa-miR-135a-3p	3.85602	182	595	135	534	0.449625	1.73377
42870	hsa-miR-616-3p	4.7767	63.5	136	15	73.5	0.0499584	0.238636
147923	hsa-miR-3142	17.8129	54.5	161	5.5	100.5	0.0183181	0.326299
147978	hsa-miR-3140-3p	2.53364	459.5	1139	414	1076	1.37885	3.49351
148361	hsa-miR-3911	2.11679	153	288.5	105	228	0.349709	0.74026
148221	hsa-miR-3650	3.08724	1343.5	4169	1297	4107.5	4.31973	13.336
147311	hsa-miR-3688-3p	7.7987	51	97.5	4.5	36	0.0149875	0.116883
168818	hsa-miR-4774-5p	2.3945	98	189	51.5	126.5	0.171524	0.410714
168658	hsa-miR-5196-5p	4.01183	112	329.5	65	267.5	0.216486	0.868506
168653	hsa-miR-3158-5p	3.22476	296.5	888	250	827	0.832639	2.68506
168915	hsa-miR-4780	2.22263	174	345	125	285	0.41632	0.925325
169116	hsa-miR-4788	8.83853	63	199.5	15	136	0.0499584	0.441558
11148	hsa-miR-515-3p	3.79513	513.5	1868	463	1802.5	1.54205	5.85227
17653	hsa-miR-133a-5p	47.767	54	139	1.5	73.5	0.00499584	0.238636
42692	hsa-miR-127-5p	6.87261	93	348	40	282	0.133222	0.915584
42887	hsa-miR-331-3p	6.0784	59.5	119.5	8.5	53	0.0283097	0.172078
146044	hsa-miR-2115-5p	3.73688	63	111	12	46	0.0399667	0.149351
17820	hsa-miRPlus-C1066	3.06378	94	200	42	132	0.139883	0.428571
147914	hsa-miR-514b-5p	2.40795	352	809.5	301	743.5	1.0025	2.41396
148666	hsa-miR-938	10.4795	58.5	131.5	6	64.5	0.0199833	0.209416
148262	hsa-miR-3680-3p	11.2106	62.5	194	11	126.5	0.0366361	0.410714
147268	hsa-miR-3940-3p	2.95933	65.5	109	14	42.5	0.0466278	0.137987
148338	hsa-miR-3064-3p	29.2451	55	95.5	1	30	0.00333056	0.0974026
146157	hsv1-miR-H4-5p	2.63951	352	878.5	301	815	1.0025	2.6461
168815	hsa-miR-4488	4.46926	83	214.5	32.5	149	0.108243	0.483766
168929	hsa-miR-4648	2.31073	116.5	223.5	67.5	160	0.224813	0.519481
168991	hsa-miR-873-3p	22.9783	54.5	147.5	3.5	82.5	0.011657	0.267857
169259	hsa-miR-4773	2.48374	259	598	209	532.5	0.696087	1.7289
168979	hsa-miR-4734	4.09432	76.5	171.5	25	105	0.0832639	0.340909
168980	hsa-miR-4324	3.30386	159.5	439	110.5	374.5	0.368027	1.21591
46235	hsa-miR-524-5p	3.42301	95.5	217.5	44	154.5	0.146545	0.501623
13183	hsa-miR-487a-3p	4.23869	129	408	79	343.5	0.263114	1.11526
147824	hsv2-miR-H9-5p	2.70021	163.5	376.5	113	313	0.376353	1.01623
147894	hsa-miR-3137	5.03666	102.5	326.5	51	263.5	0.169858	0.855519
147603	hsa-miR-4300	2.25115	321	685	270	623.5	0.899251	2.02435
168562	hsa-miR-4738-3p	2.39714	79.5	140.5	30.5	75	0.101582	0.243506
168672	hsa-miR-1587	2.15051	598	1273	548.5	1210	1.82681	3.92857
169094	hsa-miR-4482-3p	2.81116	71.5	127.5	21.5	62	0.071607	0.201299
169089	hsa-miR-4470	8.44859	56.5	114	6	52	0.0199833	0.168831
169264	hsa-miR-4762-5p	2.61364	305	745	254	681	0.845962	2.21104
17336	hsa-miR-618	2.97325	146	367.5	100	305	0.333056	0.99026
46272	hsa-miR-1200	13.3934	69	377.5	23	316	0.0766028	1.02597
27545	hsa-miR-373-5p	4.81356	247	1054	201	992.5	0.669442	3.2224
146185	bkv-miR-B1-5p	2.80378	263.5	689	218	627	0.726062	2.03571
147618	hsa-miR-4261	3.9272	63	133	17.5	70.5	0.0582848	0.228896
147797	hsa-miR-4260	8.32913	81	352	34	290.5	0.113239	0.943182
147701	hsa-miR-491-3p	7.23869	70	236	23.5	174.5	0.0782681	0.566558
147838	hsa-miR-3194-5p	8.83447	55	136	8	72.5	0.0266445	0.23539
17872	hsa-miR-148a-5p	2.90332	69	129	23	68.5	0.0766028	0.222403
168746	hsa-miR-4756-5p	2.18413	85.5	150.5	39.5	88.5	0.131557	0.287338
168911	hsa-miR-4682	7.55833	82	344.5	36.5	283	0.121565	0.918831
168834	hsa-miR-5571-5p	4.76848	85.5	266	41.5	203	0.138218	0.659091
168946	hsa-miR-4673	3.53714	155	458	109	395.5	0.363031	1.28409
168757	hsa-miR-4713-3p	9.31512	52	105.5	4.5	43	0.0149875	0.13961
168597	hsa-miR-5699-3p	3.86527	118	343.5	71.5	283.5	0.238135	0.920455
169014	hsa-miR-4714-3p	3.9114	693	2656.5	647	2596	2.15487	8.42857
169293	hsa-miR-4661-3p	2.24595	148.5	296.5	102	235	0.339717	0.762987
17377	hsa-miR-600	10.906	98	602.5	48	537	0.159867	1.74351
17641	hsa-miR-573	7.11631	55	102	5	36.5	0.0166528	0.118506
42739	hsa-miR-339-5p	8.03401	122.5	663.5	72.5	597.5	0.241465	1.93994
42475	hsa-miR-221-5p	2.43293	108	211.5	58.5	146	0.194838	0.474026
11038	hsa-miR-299-5p	2.51196	209.5	476.5	159.5	411	0.531224	1.33442
46614	hsa-miR-1323	28.4904	65.5	518.5	15.5	453	0.0516236	1.47078
42466	ebv-miR-BART18-3p	2.36819	143.5	296	95.5	232	0.318068	0.753247
42661	hsa-miR-492	2.4247	169.5	359	118	293.5	0.393006	0.952922
11140	hsa-miR-508-3p	7.7987	65	177.5	14	112	0.0466278	0.363636
146029	hsa-miR-365b-5p	3.72922	337.5	1161	286.5	1096	0.954205	3.55844
147792	hsa-miR-3165	7.71008	59.5	152	11	87	0.0366361	0.282468
147988	hsa-miR-3135a	2.86916	211	532	158.5	466.5	0.527893	1.51461
147917	hsa-miR-3151-5p	7.27879	58.5	121.5	7.5	56	0.0249792	0.181818
147905	hsa-miR-3139	2.13873	133	246	82.5	181	0.274771	0.587662
148346	hsa-miR-3929	44.8425	51	110.5	1	46	0.00333056	0.149351
148059	hsa-miR-493-5p	4.60002	83.5	217	32	151	0.106578	0.49026
42570	hsa-miR-194-3p	12.9746	89.5	624	42	559	0.139883	1.81494
42620	hsa-miR-188-5p	23.1524	50.5	113	2	47.5	0.00666112	0.154221
168922	hsa-miR-5584-3p	2.40915	129.5	260	78.5	194	0.261449	0.62987
168836	hsa-miR-4496	6.61194	73.5	222	23	156	0.0766028	0.506494
168866	hsa-miR-4771	17.2546	54	153.5	5	88.5	0.0166528	0.287338
169296	hsa-miR-5004-5p	2.40598	145	297	94	232	0.313072	0.753247
169378	hsa-miR-4430	4.02121	61	114.5	12	49.5	0.0399667	0.160714
169326	hsa-miR-451b	3.18254	725	2262.5	672.5	2195.5	2.2398	7.12825
169223	hsa-miR-4680-3p	2.21435	313.5	660	261.5	594	0.870941	1.92857
169017	hsa-miR-197-5p	3.80283	100.5	261.5	50.5	197	0.168193	0.63961
169388	hsa-miR-663a	21.2453	81	752	31.5	686.5	0.104913	2.2289
46439	hsa-miR-1243	2.52797	226	522.5	177	459	0.589509	1.49026
46705	hsa-miR-548k	6.82386	57.5	118	8	56	0.0266445	0.181818
147662	hsv2-miR-H6-5p	2.08111	93	158.5	44.5	95	0.14821	0.308442
148445	hsa-miR-3622b-5p	5.23975	62.5	126.5	12	64.5	0.0399667	0.209416
148550	hsa-miR-328-5p	3.26818	196	557	147.5	494.5	0.491257	1.60552
148068	hsa-miR-758-5p	2.66293	310	769	259	707.5	0.862614	2.29708
168832	hsa-miR-4674	3.58456	98.5	239	48	176.5	0.159867	0.573052
169219	hsa-miR-5591-5p	32.0304	53.5	178	3.5	115	0.011657	0.373377
169302	hsa-miR-4695-5p	3.39074	73	142.5	23	80	0.0766028	0.25974
Cont vs P62 2.0 fold down regulated miRNAs
		Fold change	ForeGround		ForeGround-BackGround		Normalized
ID	Name	Cont vs P62	P62	Cont	P62	Cont	P62	Cont
42638	hsa-miR-23a-5p	0.467569	384	219	331.5	159	1.10408	0.516234
11134	hsa-miR-502-5p	0.052959	548.5	89	497	27	1.65529	0.0876623
42485	ebv-miR-BART10-5p	0.475334	111.5	91	60.5	29.5	0.201499	0.0957792
46633	hsa-miR-1267	0.434683	1005.5	485.5	952	424.5	3.17069	1.37825
42896	hsa-miR-450b-5p	0.461214	98.5	83.5	46.5	22	0.154871	0.0714286
147165	hsa-let-7b-5p	0.485134	28110.5	14026	28058.5	13963.5	93.4505	45.336
168861	hsa-miR-4754	0.184706	146.5	80	95	18	0.316403	0.0584416
169170	hsa-miR-4472	0.282073	3564.5	1078	3513	1016.5	11.7002	3.30032
169086	hsa-miR-4786-5p	0.416724	118	88.5	65.5	28	0.218152	0.0909091
42598	hsa-miR-452-3p	0.395755	221	133	167.5	68	0.557868	0.220779
11240	hsa-miR-409-3p	0.133647	239	89.5	186	25.5	0.619484	0.0827922
145745	hsa-miR-335-3p	0.0418618	1309.5	117.5	1257.5	54	4.18818	0.175325
145701	hsa-miR-668-3p	0.364746	1318	537	1265.5	473.5	4.21482	1.53734
147203	hsa-miR-302a-3p	0.336448	110.5	85	56.5	19.5	0.188177	0.0633117
147837	hsa-miR-3119	0.107462	117	71	63.5	7	0.21149	0.0227273
147712	hsv1-miR-H1-5p	0.21764	1072.5	293.5	1019	227.5	3.39384	0.738636
46474	hsa-miR-766-5p	0.0668661	191.5	74	138.5	9.5	0.461282	0.0308442
168885	hsa-miR-5194	0.0516959	187	71	132	7	0.439634	0.0227273
168742	hsa-miR-4722-3p	0.402121	92	81	40	16.5	0.133222	0.0535714
168568	hsa-miR-1290	0.341369	189.5	113	138.5	48.5	0.461282	0.157468
168801	hsa-miR-4477b	0.284035	191.5	104.5	139	40.5	0.462948	0.131494
17608	hsa-miR-425-5p	0.329337	200.5	113.5	148	50	0.492923	0.162338
11171	hsa-miR-521	0.283017	81.5	70	31	9	0.103247	0.0292208
42524	hsa-miR-21-3p	0.301631	162	96	111.5	34.5	0.371357	0.112013
11141	hsa-miR-509-3p	0.0886216	101.5	66	49.5	4.5	0.164863	0.0146104
146091	hsa-miR-1914-5p	0.442363	110.5	89	59.5	27	0.198168	0.0876623
147836	hsv2-miR-H7-5p	0.193964	343.5	121.5	291.5	58	0.970858	0.188312
17835	hsa-miR-450a-5p	0.22034	124	79.5	73	16.5	0.243131	0.0535714
168605	hsa-miR-4653-3p	0.165582	259.5	97	209	35.5	0.696087	0.11526
168602	hsa-miR-4666a-3p	0.389935	153.5	103.5	102.5	41	0.341382	0.133117
168918	hsa-miR-4491	0.0769609	127.5	67	76	6	0.253122	0.0194805
168704	hsa-miR-506-5p	0.132385	92	67.5	40.5	5.5	0.134888	0.0178571
168621	hsa-miR-4796-5p	0.391998	146.5	100	94.5	38	0.314738	0.123377
169265	hsa-miR-4733-3p	0.264077	224	110	173.5	47	0.577852	0.152597
169132	hsa-miR-382-3p	0.0776763	176.5	71.5	125.5	10	0.417985	0.0324675
169289	hsa-miR-4692	0.407482	551.5	270.5	500	209	1.66528	0.678571
169308	hsa-miR-4503	0.0918597	311.5	85.5	260	24.5	0.865945	0.0795455
169199	hsa-miR-4518	0.132181	110	70.5	59	8	0.196503	0.025974
42496	hsa-miR-181c-5p	0.178324	93.5	69.5	41	7.5	0.136553	0.0243506
27551	hsa-miR-612	0.283406	294	133	242.5	70.5	0.80766	0.228896
42897	ebv-miR-BART15	0.499917	91	84	39	20	0.129892	0.0649351
10990	hsa-miR-196a-5p	0.453486	2536.5	1217.5	2485	1156	8.27644	3.75325
27546	hsa-miR-380-3p	0.0955723	103.5	67	51	5	0.169858	0.0162338
145736	hsa-miR-605-5p	0.0693013	262.5	78	211	15	0.702748	0.0487013
147608	hsa-miR-4307	0.494587	120.5	97.5	68	34.5	0.226478	0.112013
148627	hsa-miR-615-5p	0.21732	132	78	78.5	17.5	0.261449	0.0568182
148234	hsa-miR-3667-5p	0.383713	287.5	154.5	235	92.5	0.782681	0.300325
17886	hsa-miR-301b-3p	0.276204	82.5	69.5	30	8.5	0.0999167	0.0275974
168964	hsa-miR-4450	0.479197	260	163.5	207.5	102	0.691091	0.331169
168676	hsa-miR-499b-5p	0.464642	106	88.5	53.5	25.5	0.178185	0.0827922
169320	hsa-miR-4468	0.330809	912.5	352.5	859	291.5	2.86095	0.946429
42717	hsa-miR-92b-5p	0.0813712	958.5	140.5	904.5	75.5	3.01249	0.24513
17463	hsa-miR-151a-3p	0.38862	1241.5	538	1186.5	473	3.95171	1.53571
11058	hsa-miR-325	0.154736	116.5	74.5	63	10	0.209825	0.0324675
146005	hsa-miR-3129-5p	0.364333	103.5	84	49.5	18.5	0.164863	0.0600649
146085	hsa-miR-3170	0.301607	145.5	93.5	90.5	28	0.301415	0.0909091
145677	hsa-miR-139-5p	0.434292	632.5	322	578	257.5	1.92506	0.836039
145643	hsa-miR-382-5p	0.345119	650.5	278	596	211	1.98501	0.685065
46863	hsa-miR-3157-3p	0.219466	150	86.5	95.5	21.5	0.318068	0.0698052
168919	hsa-miR-4456	0.374861	3488.5	1387	3434	1320.5	11.4371	4.28734
169272	hsa-miR-4419b	0.154416	417	122.5	363	57.5	1.20899	0.186688
169247	hsa-miR-4477a	0.176708	220.5	96	165.5	30	0.551207	0.0974026
29529	hsa-miR-369-3p	0.0113353	224	63.5	172	2	0.572856	0.00649351
33902	hsa-miR-128-3p	0.23541	213.5	100.5	161.5	39	0.537885	0.126623
46336	hsa-miR-1284	0.360817	128.5	90.5	77	28.5	0.256453	0.0925325
32608	hsa-miR-761	0.108478	385	100.5	332.5	37	1.10741	0.12013
42666	hsa-miR-26a-2-3p	0.416337	101	83.5	48	20.5	0.159867	0.0665584
19585	hsa-miR-148b-3p	0.483562	4601.5	2320	4550	2257	15.154	7.32792
14272	hsa-miR-542-3p	0.439866	93.5	81	41	18.5	0.136553	0.0600649
10964	hsa-miR-155-5p	0.411995	652.5	315	601	254	2.00167	0.824675
146089	hsv1-miR-H8-5p	0.140534	817.5	173	766.5	110.5	2.55287	0.358766
147554	hsa-miR-4273	0.0562406	104.5	65.5	52	3	0.173189	0.00974026
148289	hsa-miR-3675-5p	0.22117	397.5	140.5	346	78.5	1.15237	0.25487
42755	hcmv-miR-US33-3p	0.207784	554	170	502	107	1.67194	0.347403
168735	hsa-miR-5586-3p	0.452877	115.5	91.5	63.5	29.5	0.21149	0.0957792
169295	hsa-miR-4725-3p	0.442445	252.5	154	200.5	91	0.667777	0.295455
168995	hsa-miR-4791	0.261221	720	241	668	179	2.22481	0.581169
42633	hsa-miR-885-3p	0.101915	162	72.5	110	11.5	0.366361	0.0373377
45775	hsa-miR-1279	0.320495	88	73.5	36.5	12	0.121565	0.038961
42446	hsa-miR-576-5p	0.382531	91.5	78.5	39.5	15.5	0.131557	0.0503247
33596	hsa-miR-126-5p	0.436534	233	142.5	182	81.5	0.606162	0.26461
11245	hsa-miR-433-5p	0.472103	1054.5	548.5	1002.5	485.5	3.33888	1.5763
145852	hsa-miR-210-3p	0.480728	525.5	296	473.5	233.5	1.57702	0.758117
145634	hsa-miR-132-5p	0.246275	98.5	74.5	47.5	12	0.158201	0.038961
168952	hsa-miR-4781-3p	0.477653	600.5	331	549	269	1.82848	0.873377
168727	hsa-miR-4426	0.137314	1087.5	208	1036.5	146	3.45212	0.474026
168748	hsa-miR-320e	0.240797	177.5	93.5	125.5	31	0.417985	0.100649
168875	hsa-miR-5091	0.225582	112	76	60.5	14	0.201499	0.0454545
169218	hsa-miR-5189-5p	0.269514	392	156.5	340	94	1.13239	0.305195
169138	hsa-miR-4504	0.429393	176	118	126	55.5	0.41965	0.180195
169408	hsa-miR-181d-5p	0.464715	738	390.5	687	327.5	2.28809	1.06331
42576	hsa-miR-342-5p	0.012035	95	65	40.5	0.5	0.134888	0.00162338
46869	hsa-miR-1258	0.156733	747.5	176	693.5	111.5	2.30974	0.362013
29328	hsa-miR-582-3p	0.280635	87.5	75	33	9.5	0.109908	0.0308442
17349	hsa-miR-595	0.38684	85.5	78.5	31.5	12.5	0.104913	0.0405844
46872	hsa-miR-1262	0.0683466	189	74.5	135.5	9.5	0.451291	0.0308442
21702	hsa-miR-219a-1-3p	0.0895797	424	98.5	370	34	1.23231	0.11039
11022	hsa-miR-221-3p	0.448014	1310	642	1255.5	577	4.18152	1.87338
42730	hsa-miR-423-3p	0.354137	687.5	295.5	634.5	230.5	2.11324	0.748377
147816	hsa-miR-3162-5p	0.170655	263	102	208.5	36.5	0.694421	0.118506
11037	hsa-miR-299-3p	0.339452	108.5	83.5	56	19.5	0.186511	0.0633117
168593	hsa-miR-4726-3p	0.361633	87	78	31	11.5	0.103247	0.0373377
169056	hsa-miR-4669	0.29297	241.5	120.5	188	56.5	0.626145	0.183442
169022	hsa-miR-4797-5p	0.323105	231.5	124.5	176.5	58.5	0.587843	0.189935
169262	hsa-miR-5009-5p	0.448735	181.5	123	126	58	0.41965	0.188312
169079	hsa-miR-4667-5p	0.39668	4074	1700	4018	1635	13.3822	5.30844
169213	hsa-miR-4768-3p	0.486241	468	271.5	414	206.5	1.37885	0.670455
169363	hsa-miR-320c	0.189486	1281.5	302.5	1227	238.5	4.08659	0.774351
169082	hsa-miR-1275	0.208783	18562.5	4029	18508.5	3964	61.6436	12.8701
169020	hsa-miR-4506	0.0847685	89	68.5	34.5	3	0.114904	0.00974026
169399	hsa-miR-4750-5p	0.372838	734.5	325.5	678.5	259.5	2.25978	0.842532
46737	hsa-miR-1265	0.392467	167.5	110	115.5	46.5	0.384679	0.150974
42535	hsa-miR-661	0.125786	83	66	31	4	0.103247	0.012987
17439	hcmv-miR-UL36-5p	0.313741	96	75.5	43.5	14	0.144879	0.0454545
29802	hsa-miR-144-3p	0.201623	300	114	249	51.5	0.829309	0.167208
4040	hsa-miR-9-5p	0.429308	1490.5	697.5	1438.5	633.5	4.79101	2.05682
146163	hsa-miR-224-3p	0.193993	552.5	161.5	500	99.5	1.66528	0.323052
145746	hsa-let-7i-3p	0.310991	133.5	88.5	81.5	26	0.27144	0.0844156
147613	hsa-miR-3145-3p	0.162473	103	70.5	51	8.5	0.169858	0.0275974
147523	hsa-miR-4263	0.163136	176.5	81.5	122.5	20.5	0.407993	0.0665584
168973	hsa-miR-1268b	0.455729	213.5	137	161.5	75.5	0.537885	0.24513
168793	hsa-miR-4483	0.400767	97	80	45	18.5	0.149875	0.0600649
169166	hsa-miR-4683	0.373688	81	74.5	30	11.5	0.0999167	0.0373377
169376	hsa-miR-5701	0.383902	407.5	202.5	355.5	140	1.18401	0.454545
46623	hsa-miR-1273a	0.165227	108	71.5	59	10	0.196503	0.0324675
46258	hsa-miR-1184	0.0943391	113	69.5	62	6	0.206495	0.0194805
146035	hsv1-miR-H2-5p	0.0639238	79	65.5	30.5	2	0.101582	0.00649351
145714	hsa-miR-28-3p	0.226819	149.5	86	101	23.5	0.336386	0.0762987
147925	hsa-miR-3126-5p	0.0771746	288.5	81.5	240	19	0.799334	0.0616883
147857	hsa-miR-3130-5p	0.4285	187	124	136.5	60	0.454621	0.194805
148072	hsa-miR-3668	0.411903	84	76.5	35.5	15	0.118235	0.0487013
148379	hsa-miR-3654	0.333497	467	204.5	418	143	1.39217	0.464286
148559	hsa-miR-411-3p	0.00492342	149	63.5	99	0.5	0.329725	0.00162338
148278	hsa-miR-138-2-3p	0.415505	79	75	30.5	13	0.101582	0.0422078
168897	hsa-miR-5187-5p	0.0378578	98.5	64.5	51.5	2	0.171524	0.00649351
17958	hsa-miR-576-3p	0.120443	183	82	129.5	16	0.431307	0.0519481
10997	hsa-miR-19a-3p	0.44445	613.5	320.5	561.5	256	1.87011	0.831169
11023	hsa-miR-222-3p	0.0666522	1303.5	150.5	1250.5	85.5	4.16486	0.277597
168583	hsa-miR-539-3p	0.155409	87.5	71.5	34.5	5.5	0.114904	0.0178571
168682	hsa-miR-4502	0.170597	91.5	73	40	7	0.133222	0.0227273
168994	hsa-miR-3591-5p	0.183932	316.5	115.5	265	50	0.882598	0.162338
169389	hsa-miR-4717-3p	0.452877	116	95	63.5	29.5	0.21149	0.0957792
42834	hsa-miR-219a-2-3p	0.089609	409.5	97	359	33	1.19567	0.107143
19595	hsa-miR-30a-3p	0.427671	128.5	96.5	77.5	34	0.258118	0.11039
17338	hsa-miR-660-5p	0.385727	192	117.5	139	55	0.462948	0.178571
17520	hcmv-miR-US5-2-3p	0.197435	91	72.5	39.5	8	0.131557	0.025974
10947	hsa-miR-142-3p	0.328548	276.5	139	225.5	76	0.751041	0.246753
14328	hsa-miR-124-3p	0.0266349	418.5	72	366	10	1.21898	0.0324675
17619	hcmv-miR-US25-2-5p	0.0327677	111	65	59.5	2	0.198168	0.00649351
147885	kshv-miR-K12-5-5p	0.282461	1803.5	569.5	1751.5	507.5	5.83347	1.64773
168716	hsa-miR-4487	0.0451314	106	64.5	54	2.5	0.17985	0.00811688
168892	hsa-miR-4424	0.159809	82.5	68	30.5	5	0.101582	0.0162338
169040	hsa-miR-4753-5p	0.243709	175.5	93.5	124	31	0.412989	0.100649
169189	hsa-miR-4795-5p	0.0376462	544	81	492	19	1.63863	0.0616883
27544	hsa-miR-363-5p	0.0464208	225.5	70.5	178.5	8.5	0.594505	0.0275974
42873	hsa-miR-944	0.141281	80.5	67	34.5	5	0.114904	0.0162338
27533	hsa-miR-320a	0.453232	2620	1258	2573.5	1196.5	8.57119	3.88474
17402	ebv-miR-BART2-5p	0.283813	86.5	73.5	39.5	11.5	0.131557	0.0373377
42476	hsa-miR-374b-3p	0.0203091	119	63	72	1.5	0.2398	0.00487013
147904	hsa-miR-3148	0.465852	104	90	56.5	27	0.188177	0.0876623
148663	hsa-miR-557	0.440249	140.5	103	93	42	0.309742	0.136364
168636	hsa-miR-122-5p	0.209816	1254	323	1208	260	4.02331	0.844156
168903	hsa-miR-4439	0.343253	152	100.5	106.5	37.5	0.354704	0.121753
168941	hsa-miR-4501	0.253304	110	77.5	63.5	16.5	0.21149	0.0535714
168930	hsa-miR-5582-5p	0.0165227	135	63	88.5	1.5	0.294754	0.00487013
168599	hsa-miR-4453	0.445201	110	91	63.5	29	0.21149	0.0941558
168846	hsa-miR-1273f	0.409191	84.5	78	40.5	17	0.134888	0.0551948
169149	hsa-miR-4659b-5p	0.455532	99	86.5	53.5	25	0.178185	0.0811688
169065	hsa-miR-378h	0.460711	119.5	96	73	34.5	0.243131	0.112013
169145	hsa-miR-5000-3p	0.377589	1333	560.5	1287	498.5	4.28643	1.61851
46918	hsa-miR-375	0.349317	112	86	60	21.5	0.199833	0.0698052
147584	hsa-miR-548t-5p	0.158695	94	73	43	7	0.143214	0.0227273
145670	hsa-miR-18b-5p	0.308699	110	84.5	60	19	0.199833	0.0616883
147501	hsa-miR-98-3p	0.464208	136	105.5	84	40	0.279767	0.12987
148057	hsa-miR-186-3p	0.135737	208.5	86.5	158	22	0.526228	0.0714286
168802	hsa-miR-4516	0.467971	453	259	401	192.5	1.33555	0.625
168863	hsa-miR-4441	0.309859	1033	378.5	980	311.5	3.26395	1.01136
169028	hsa-miR-4708-3p	0.453844	473	262.5	421	196	1.40216	0.636364
42866	hsa-miR-451a	0.479876	3280.5	1654.5	3231	1590.5	10.761	5.16396
46335	hsa-miR-548m	0.193534	186.5	91.5	136	27	0.452956	0.0876623
10946	hsa-miR-141-3p	0.454924	88	80.5	37.5	17.5	0.124896	0.0568182
146169	mcv-miR-M1-3p	0.210094	110.5	75	58	12.5	0.193172	0.0405844
148418	hsa-miR-3607-5p	0.0591528	257	76	206	12.5	0.686095	0.0405844
168857	hsa-miR-2392	0.455871	360.5	207	309	144.5	1.02914	0.469156
168864	hsa-miR-320d	0.347617	567	246.5	516	184	1.71857	0.597403
168860	hsa-miR-4766-5p	0.198946	272.5	108	220.5	45	0.734388	0.146104
169383	hsa-miR-548ah-5p	0.0173304	162	65	112.5	2	0.374688	0.00649351
169161	hsa-miR-4489	0.318697	208	114.5	156	51	0.519567	0.165584
42852	hsa-miR-760	0.125336	81	66	35	4.5	0.11657	0.0146104
17668	hsa-miR-552-3p	0.390371	268.5	151.5	223.5	89.5	0.74438	0.290584
30687	hsa-miR-93-5p	0.451916	18745.5	8730.5	18699	8668.5	62.2781	28.1445
17567	kshv-miR-K12-1-5p	0.203091	286	111.5	240	50	0.799334	0.162338
14270	hsa-miR-493-3p	0.123571	83	66	35.5	4.5	0.118235	0.0146104
11104	hsa-miR-422a	0.417316	342	186.5	295.5	126.5	0.98418	0.410714
17841	hsa-miRPlus-C1100	0.164583	84	66.5	38.5	6.5	0.128226	0.0211039
145956	hsa-miRPlus-A1083	0.480034	112.5	94	66	32.5	0.219817	0.105519
42957	hsa-miR-323a-3p	0.0273319	156.5	67.5	107	3	0.35637	0.00974026
11111	hsa-miR-432-5p	0.499263	318	203	267.5	137	0.890924	0.444805
147996	hsa-miR-3127-5p	0.380397	909	400.5	858.5	335	2.85928	1.08766
147739	hsa-miR-3161	0.459566	224.5	148	175	82.5	0.582848	0.267857
168968	hsa-miR-147b	0.262651	146.5	92.5	96.5	26	0.321399	0.0844156
168695	hsa-miR-5589-5p	0.0401041	207.5	72	158	6.5	0.526228	0.0211039
46731	hsa-miR-4657	0.477504	662.5	366.5	614.5	301	2.04663	0.977273
169322	hsa-miR-4534	0.396353	3421.5	1436.5	3372	1371	11.2306	4.4513
169155	hsa-miR-4480	0.176677	1299.5	290.5	1252.5	227	4.17152	0.737013
29460	hsa-miR-553	0.0672302	94	66	43.5	3	0.144879	0.00974026
10987	hsa-miR-193b-3p	0.439255	304	175.5	253	114	0.842631	0.37013
145857	hsa-miR-154-5p	0.493021	136.5	106.5	87	44	0.289759	0.142857
147856	hsa-miR-3200-3p	0.446459	169.5	117	119	54.5	0.396336	0.176948
147952	hsa-miR-3171	0.49825	208	144	157.5	80.5	0.524563	0.261364
148644	hsa-miR-551b-3p	0.139696	209.5	86.5	160.5	23	0.534555	0.0746753
148652	hsa-miR-620	0.487419	305.5	191	256	128	0.852623	0.415584
168965	hsa-miR-4765	0.274602	84	72.5	35.5	10	0.118235	0.0324675
168944	hsa-miR-4707-5p	0.33731	470	208	420.5	145.5	1.4005	0.472403
169244	hsa-miR-5572	0.380924	407	201.5	357	139.5	1.18901	0.452922

## Sheet: Cont_drug vs P62_drug
# Condition pairs: Cont_drug vs P62_drug # Fold Change cut-off: 2.0 # Column "ID": array ID of the probes, each miRNA always has its unique probe, but some miRNAs may have two different probes. # Column "Name": the name of each miRNA. # Column "Fold change": the ratio of normalized intensities between two conditions (use normalized data, ratio scale). # Column "ForeGround": the foreground intensi…
Cont_drug vs P62_drug 2.0 fold up regulated miRNAs
		Fold change	ForeGround		ForeGround-BackGround		Normalized
ID	Name	Cont_drug vs P62_drug	P62_drug	Cont_drug	P62_drug	Cont_drug	P62_drug	Cont_drug
46507	hsa-miR-921	2.02424	168	295	120	242.5	0.403361	0.816498
42812	hsa-miR-508-5p	3.28784	194.5	534	147	482.5	0.494118	1.62458
46752	hsa-miR-1270	3.50589	67	118.5	19	66.5	0.0638655	0.223906
46411	hsa-miR-1203	15.1684	51	105.5	3.5	53	0.0117647	0.178451
145838	hsa-miR-125b-1-3p	3.74015	490.5	1700.5	441.5	1648.5	1.48403	5.55051
147535	hsa-miR-4309	2.45261	131	255	82.5	202	0.277311	0.680135
148231	hsa-miR-3918	13.2723	56	131	6	79.5	0.0201681	0.267677
148635	hsa-miR-933	3.79532	148	428.5	99.5	377	0.334454	1.26936
148306	hsa-miR-381-3p	2.07245	62	82	14.5	30	0.0487395	0.10101
168825	hsa-miR-4729	3.53535	192.5	562.5	144.5	510	0.485714	1.71717
169168	hsa-miR-5580-3p	7.77778	56	119.5	8.5	66	0.0285714	0.222222
169335	hsa-miR-4699-5p	2.92224	234.5	599	187.5	547	0.630252	1.84175
169167	hsa-miR-4451	2.41582	142	278	93.5	225.5	0.314286	0.759259
169386	hsa-miR-4427	2.19724	63	86.5	15.5	34	0.0521008	0.114478
28019	hsa-miR-10a-3p	2.45077	250.5	547.5	201.5	493	0.677311	1.65993
11181	hsa-miR-95-3p	14.865	62	239.5	12.5	185.5	0.0420168	0.624579
42811	hsa-miR-542-5p	2.7399	68	100.5	17	46.5	0.0571429	0.156566
146077	hsv2-miR-H3	2.03428	1184.5	2356	1134	2303	3.81176	7.75421
42838	hsa-miRPlus-C1076	2.92917	81.5	150	33	96.5	0.110924	0.324916
148208	hsa-miR-3610	3.02618	169	412	118.5	358	0.398319	1.20539
148040	hsa-miR-1247-3p	2.53128	88	148.5	37	93.5	0.12437	0.314815
168799	hsa-miR-4710	2.92158	77.5	125	24	70	0.0806723	0.23569
168673	hsa-miR-4656	2.11748	170	304	118.5	250.5	0.398319	0.843434
168744	hsa-miR-4746-5p	2.24013	107	178	55	123	0.184874	0.414141
169241	hsa-miR-5571-3p	4.06059	101	243	46.5	188.5	0.156303	0.63468
11159	hsa-miR-518e-3p	2.22918	135.5	245.5	86.5	192.5	0.290756	0.648148
145934	hsa-miRPlus-B1114	2.83696	341	879	292	827	0.981513	2.78451
168844	hsa-miR-4532	2.50308	2054	5062	2004.5	5009	6.73782	16.8653
169106	hsa-miR-4783-3p	5.2816	60	110	11	58	0.0369748	0.195286
17882	hsa-miR-20b-3p	2.41146	75	118	27	65	0.0907563	0.218855
46565	hsa-miR-1207-5p	7.093	67.5	183.5	18.5	131	0.0621849	0.441077
13130	hsa-miR-517-5p	3.25547	94	203	46	149.5	0.154622	0.503367
145933	hsa-miR-652-5p	2.30387	98	167.5	50	115	0.168067	0.387205
146161	hsa-miR-2115-3p	2.14394	1548	3263.5	1500	3210.5	5.04202	10.8098
145962	hsa-miR-639	4.92494	77.5	200.5	30	147.5	0.10084	0.496633
147544	hsa-miR-4314	3.14321	77.5	142.5	29	91	0.097479	0.306397
147830	hsv1-miR-H18	5.04694	62	118	13	65.5	0.0436975	0.220539
148474	hsa-miR-3622a-5p	9.71633	52.5	101	5	48.5	0.0168067	0.1633
147640	kshv-miR-K12-10a-5p	2.12262	69	96.5	21	44.5	0.0705882	0.149832
147318	hsa-miR-3660	2.30707	236.5	485	188	433	0.631933	1.45791
168684	hsa-miR-5010-5p	2.58126	61.5	87	13	33.5	0.0436975	0.112795
168679	hsa-miR-4763-3p	4.38575	67	134	18.5	81	0.0621849	0.272727
168755	hsa-miR-4479	35.0589	49.5	87.5	1	35	0.00336134	0.117845
168572	hsa-miR-4507	2.31488	235	484	186.5	431	0.626891	1.45118
169118	hsa-miR-5009-3p	4.38999	106	305	57.5	252	0.193277	0.848485
168987	hsa-miR-4523	5.08262	61.5	122.5	13.5	68.5	0.0453782	0.23064
46744	hsa-miR-526b-5p	20.6347	53.5	108.5	2.5	51.5	0.00840336	0.173401
46789	hsa-miR-513b-5p	5.48748	67	117.5	11.5	63	0.0386555	0.212121
46622	hsa-miR-518f-5p	4.44979	76.5	170	26	115.5	0.087395	0.388889
169159	hsa-miR-4521	2.34038	159	306	107	250	0.359664	0.841751
169194	hsa-miR-4513	2.39402	102.5	174.5	50	119.5	0.168067	0.402357
17415	ebv-miR-BART10-3p	2.07757	90	137	40.5	84	0.136134	0.282828
27541	hcmv-miR-UL70-3p	3.86133	80.5	172.5	31	119.5	0.104202	0.402357
147803	hsv2-miR-H10	3.1729	512	1517.5	462.5	1465	1.55462	4.93266
147884	hsv2-miR-H25	4.67001	124.5	397.5	74	345	0.248739	1.16162
147602	hsa-miR-2682-5p	2.81902	120.5	250.5	70	197	0.235294	0.6633
46762	hsa-miR-3928-3p	18.1973	52.5	108	3	54.5	0.010084	0.183502
169018	hsa-miR-4640-5p	2.71899	2761	7414.5	2712	7361.5	9.11597	24.7862
169142	hsa-miR-550a-5p	2.65689	2811.5	7379.5	2762	7326	9.28403	24.6667
169016	hsa-miR-4743-5p	2.56711	794.5	1960.5	744.5	1908	2.50252	6.42424
169339	hsa-miR-5579-3p	4.29489	231.5	835.5	182.5	782.5	0.613445	2.63468
42543	hsa-miR-608	2.96652	73.5	130.5	26	77	0.087395	0.259259
42808	hsa-miR-874-3p	2.23009	316.5	652.5	269.5	600	0.905882	2.0202
29190	hsa-miR-708-5p	3.61477	91.5	219.5	46	166	0.154622	0.558923
11121	hsa-miR-489-3p	3.6018	70.5	137.5	23.5	84.5	0.0789916	0.284512
147979	hsa-miR-3150a-3p	3.02592	72	125	24	72.5	0.0806723	0.244108
148351	hsa-miR-3945	2.65446	66.5	106.5	20	53	0.0672269	0.178451
148039	hsa-miR-3925-5p	2.68098	81.5	145	34	91	0.114286	0.306397
168571	hsa-miR-550b-2-5p	2.43943	522.5	1211	475.5	1158	1.59832	3.89899
168800	hsa-miR-4724-5p	3.07494	69	119.5	21.5	66	0.0722689	0.222222
168736	hsa-miR-4796-3p	2.09644	1040.5	2136.5	995.5	2083.5	3.34622	7.01515
169367	hsa-miR-4444	2.88469	820.5	2282.5	774	2229	2.60168	7.50505
168997	hsa-miR-5584-5p	2.30329	476	1036.5	427.5	983	1.43697	3.30976
169303	hsa-miR-378g	2.3093	2029	4624.5	1982.5	4570.5	6.66387	15.3889
145974	hsa-miR-200b-5p	3.92326	63	102	12	47	0.0403361	0.158249
147786	hsa-miR-3198	3.58937	79	162	30	107.5	0.10084	0.361953
147280	hsa-miR-1185-1-3p	2.30344	1222.5	2745	1170	2690.5	3.93277	9.05892
148187	hsa-miR-410-5p	2.32767	2296.5	5273	2245.5	5218	7.5479	17.569
168796	hsa-miR-3664-3p	4.92062	835	3895.5	781.5	3839	2.62689	12.9259
169238	hsa-miR-4654	2.53281	770	1872	718	1815.5	2.41345	6.11279
17892	hsa-miR-372-5p	2.00734	302	559	252	505	0.847059	1.70034
145789	hsa-miR-550a-3-5p/hsa-miR-550a-5p	2.46237	1121.5	2687.5	1071.5	2634	3.60168	8.86869
145768	hsa-miR-665	2.10794	143.5	246	91	191.5	0.305882	0.644781
147804	hsv1-miR-H17	3.76142	75.5	146	24.5	92	0.0823529	0.309764
168578	hsa-miR-5190	4.10367	66.5	117.5	15.5	63.5	0.0521008	0.213805
168627	hsa-miR-4678	2.14456	426.5	859	376	805	1.26387	2.71044
42929	hsa-miR-25-5p	2.23743	590	1267	543.5	1214	1.82689	4.08754
42869	hsa-miR-936	2.43615	1115	2648	1067	2595	3.58655	8.73737
147682	hsv1-miR-H6-5p	3.4953	211	631	165.5	577.5	0.556303	1.94444
168785	hsa-miR-520d-5p	4.63938	56.5	98	9.5	44	0.0319328	0.148148
168703	hsa-miR-4716-3p	2.03424	335	646	292	593	0.981513	1.99663
169115	hsa-miR-450a-2-3p	4.52898	106.5	317.5	58.5	264.5	0.196639	0.890572
46215	hsa-miR-1301-3p	2.51673	212	457	160	402	0.537815	1.35354
42533	hiv1-miR-H1	2.21689	909.5	1957	858.5	1900	2.88571	6.39731
146072	hsa-miR-1469	2.34138	177	341	121.5	284	0.408403	0.956229
146052	hsa-miR-1471	4.86272	80.5	190	27.5	133.5	0.092437	0.449495
145716	hsa-miR-671-5p	2.73363	128.5	267	77.5	211.5	0.260504	0.712121
147967	hsa-miR-3180/hsa-miR-3180-3p	3.83403	65.5	111	14.5	55.5	0.0487395	0.186869
56873	hsa-miR-3124-5p	3.37777	73	128	21.5	72.5	0.0722689	0.244108
148650	hsa-miR-516a-5p	5.08547	64	121.5	13	66	0.0436975	0.222222
148514	hsa-miR-365a-5p	3.00505	66	101.5	15	45	0.0504202	0.151515
169357	hsa-miR-4689	3.65403	88.5	187	35.5	129.5	0.119328	0.436027
169306	hsa-miR-4758-5p	2.46775	648.5	1527	597.5	1472	2.0084	4.95623
169288	hsa-miR-4730	2.71886	74.5	123	24.5	66.5	0.0823529	0.223906
42761	hsa-miR-675-5p	2.07502	384.5	749	335.5	695	1.12773	2.34007
148106	hsa-miR-3678-3p	2.8689	100	200.5	51.5	147.5	0.173109	0.496633
145769	hsa-miR-371a-5p	3.22005	357.5	1042.5	307.5	988.5	1.03361	3.32828
42528	hsa-miR-296-3p	3.0607	139.5	331.5	90	275	0.302521	0.925926
169163	hsa-miR-4685-5p	2.50421	87	147.5	37	92.5	0.12437	0.311448
30493	hsa-miR-548a-5p	3.07213	155.5	397	112	343.5	0.376471	1.15657
42898	hsa-miR-124-5p	3.83403	58.5	108.5	14.5	55.5	0.0487395	0.186869
42609	hsa-miR-135a-3p	2.72131	160.5	369.5	116.5	316.5	0.391597	1.06566
42490	hsa-miR-505-5p	2.11441	928	1918.5	884	1866	2.97143	6.28283
42870	hsa-miR-616-3p	2.86969	62.5	106	18.5	53	0.0621849	0.178451
147923	hsa-miR-3142	4.74482	53	98	9.5	45	0.0319328	0.151515
147978	hsa-miR-3140-3p	2.59712	499	1234	455.5	1181	1.53109	3.97643
147818	hsa-miR-4270	2.05798	1650	3350.5	1605	3297.5	5.39496	11.1027
148361	hsa-miR-3911	2.15411	143.5	274.5	103	221.5	0.346218	0.745791
148221	hsa-miR-3650	3.67629	1590.5	5732.5	1547.5	5679.5	5.20168	19.1229
168658	hsa-miR-5196-5p	7.38978	97	443.5	53	391	0.178151	1.3165
168653	hsa-miR-3158-5p	3.23338	246.5	712.5	204	658.5	0.685714	2.21717
169116	hsa-miR-4788	4.00673	62	125.5	18	72	0.0605042	0.242424
11148	hsa-miR-515-3p	2.32779	472	1039	423	983	1.42185	3.30976
42692	hsa-miR-127-5p	2.35396	92.5	151	40	94	0.134454	0.316498
17752	hsa-let-7f-5p	4.88403	660	3021	608	2964.5	2.0437	9.98148
147914	hsa-miR-514b-5p	2.5352	301	689.5	250.5	634	0.842017	2.13468
168815	hsa-miR-4488	2.10881	78.5	115	28.5	60	0.0957983	0.20202
46235	hsa-miR-524-5p	2.91156	87.5	163	37.5	109	0.12605	0.367003
13183	hsa-miR-487a-3p	2.25104	140.5	259	91	204.5	0.305882	0.688552
147824	hsv2-miR-H9-5p	2.6988	129.5	265	78.5	211.5	0.263866	0.712121
147894	hsa-miR-3137	2.95558	89	173.5	40.5	119.5	0.136134	0.402357
169264	hsa-miR-4762-5p	2.47894	268	594	218	539.5	0.732773	1.8165
17498	hsa-miR-601	2.49238	234	525.5	190.5	474	0.640336	1.59596
17336	hsa-miR-618	2.33326	127	247	83.5	194.5	0.280672	0.654882
46272	hsa-miR-1200	6.89796	65.5	203	22	151.5	0.0739496	0.510101
27545	hsa-miR-373-5p	4.9625	218.5	916	174.5	864.5	0.586555	2.91077
146185	bkv-miR-B1-5p	3.33283	234	686.5	191	635.5	0.642017	2.13973
147618	hsa-miR-4261	2.31639	60	88.5	16	37	0.0537815	0.124579
147797	hsa-miR-4260	4.43603	72	176	28	124	0.0941176	0.417508
147701	hsa-miR-491-3p	5.79545	79	253.5	35	202.5	0.117647	0.681818
168911	hsa-miR-4682	3.75631	77	178.5	34	127.5	0.114286	0.429293
168645	hsa-miR-378i	2.39704	831.5	1937	787.5	1884.5	2.64706	6.34512
168834	hsa-miR-5571-5p	3.41558	74.5	156	30.5	104	0.102521	0.350168
168946	hsa-miR-4673	2.17207	138	260.5	95	206	0.319328	0.693603
168597	hsa-miR-5699-3p	2.49725	116	231.5	72	179.5	0.242017	0.604377
169014	hsa-miR-4714-3p	2.73433	784	2071.5	740	2020	2.48739	6.80135
17377	hsa-miR-600	3.32019	93.5	203.5	44.5	147.5	0.14958	0.496633
46614	hsa-miR-1323	5.91316	65	144	15.5	91.5	0.0521008	0.308081
42570	hsa-miR-194-3p	4.0303	87	225.5	42.5	171	0.142857	0.575758
168836	hsa-miR-4496	2.4416	65	95	16	39	0.0537815	0.131313
168701	hsa-miR-4728-5p	2.22344	1655.5	3626	1609	3571.5	5.4084	12.0253
169326	hsa-miR-451b	2.42683	748	1751	699	1693.5	2.34958	5.70202
169388	hsa-miR-663a	4.30594	88	218.5	38.5	165.5	0.129412	0.557239
46439	hsa-miR-1243	2.26005	208.5	415.5	160	361	0.537815	1.21549
46705	hsa-miR-548k	4.50758	56.5	90	8	36	0.0268908	0.121212
147662	hsv2-miR-H6-5p	2.03327	83	122.5	33.5	68	0.112605	0.228956
148445	hsa-miR-3622b-5p	3.44579	62	98	12.5	43	0.0420168	0.144781
148550	hsa-miR-328-5p	4.27719	198.5	694	150	640.5	0.504202	2.15657
168832	hsa-miR-4674	2.00337	73	103.5	24.5	49	0.0823529	0.164983
169059	hsa-miR-642a-3p	2.04878	434.5	843	386	789.5	1.29748	2.65825
169219	hsa-miR-5591-5p	9.68294	54	97	4.5	43.5	0.0151261	0.146465
169143	hsa-miR-4459	2.38296	919	2122.5	869.5	2068.5	2.92269	6.96465
169302	hsa-miR-4695-5p	3.53719	65.5	110.5	16	56.5	0.0537815	0.190236
Cont_drug vs P62_drug 2.0 fold down regulated miRNAs
		Fold change	ForeGround		ForeGround-BackGround		Normalized
ID	Name	Cont_drug vs P62_drug	P62_drug	Cont_drug	P62_drug	Cont_drug	P62_drug	Cont_drug
11134	hsa-miR-502-5p	0.0846493	438	86	390.5	33	1.31261	0.111111
147165	hsa-let-7b-5p	0.472547	27156.5	12840	27108.5	12788.5	91.121	43.0589
168861	hsa-miR-4754	0.454252	90.5	72	43	19.5	0.144538	0.0656566
168569	hsa-miR-5088-5p	0.0544393	94	55	46	2.5	0.154622	0.00841751
169086	hsa-miR-4786-5p	0.265506	90	62.5	41.5	11	0.139496	0.037037
11240	hsa-miR-409-3p	0.143098	218.5	78.5	168	24	0.564706	0.0808081
145745	hsa-miR-335-3p	0.06965	992.5	120	942	65.5	3.16639	0.220539
145701	hsa-miR-668-3p	0.253494	1678.5	466	1630	412.5	5.47899	1.38889
147837	hsa-miR-3119	0.0682966	117	59	66	4.5	0.221849	0.0151515
147712	hsv1-miR-H1-5p	0.329423	723.5	275.5	672	221	2.25882	0.744108
46474	hsa-miR-766-5p	0.0817701	175.5	65	122.5	10	0.411765	0.03367
168885	hsa-miR-5194	0.0925468	145	63.5	92	8.5	0.309244	0.0286195
168568	hsa-miR-1290	0.416508	195	113.5	145.5	60.5	0.489076	0.203704
168801	hsa-miR-4477b	0.13634	229.5	77.5	180	24.5	0.605042	0.0824916
169117	hsa-miR-4759	0.023295	116	56	64.5	1.5	0.216807	0.00505051
169336	hsa-miR-17-5p	0.433282	7406	3236	7354	3181	24.7193	10.7104
169090	hsa-miR-5186	0.40662	1297	561	1246.5	506	4.18992	1.7037
14301	hsa-miR-361-5p	0.481431	2075.5	1027	2025.5	973.5	6.8084	3.27778
145842	hsa-miR-658	0.0715488	119.5	58.5	70	5	0.235294	0.016835
147836	hsv2-miR-H7-5p	0.361523	334	156	284	102.5	0.954622	0.345118
17835	hsa-miR-450a-5p	0.326938	121.5	76	72	23.5	0.242017	0.0791246
168605	hsa-miR-4653-3p	0.280471	262.5	111	212.5	59.5	0.714286	0.200337
168918	hsa-miR-4491	0.151333	119.5	63.5	69.5	10.5	0.233613	0.0353535
168704	hsa-miR-506-5p	0.372054	85	65.5	35	13	0.117647	0.043771
169132	hsa-miR-382-3p	0.193218	147.5	72	98.5	19	0.331092	0.0639731
169308	hsa-miR-4503	0.141239	318	90.5	269.5	38	0.905882	0.127946
169199	hsa-miR-4518	0.197515	86	58.5	35.5	7	0.119328	0.023569
27568	hsa-miR-744-5p	0.474027	2308	1121.5	2260	1069.5	7.59664	3.60101
27546	hsa-miR-380-3p	0.48433	93	75	45.5	22	0.152941	0.0740741
146045	hsv2-miR-H4-5p	0.0814377	232	67.5	184.5	15	0.620168	0.0505051
145736	hsa-miR-605-5p	0.161365	213.5	79.5	164.5	26.5	0.552941	0.0892256
145727	hsa-miR-501-3p	0.438237	80.5	67.5	32	14	0.107563	0.047138
148234	hsa-miR-3667-5p	0.478637	252	150	203	97	0.682353	0.326599
42717	hsa-miR-92b-5p	0.205038	434	133	383.5	78.5	1.28908	0.26431
42640	hsa-miR-20b-5p	0.484216	1634	819.5	1581.5	764.5	5.31597	2.57407
17463	hsa-miR-151a-3p	0.288984	1363	433	1308.5	377.5	4.39832	1.27104
11058	hsa-miR-325	0.259056	138	77	87	22.5	0.292437	0.0757576
42744	hsa-miR-23a-3p	0.49758	7419	3715	7370	3661	24.7731	12.3266
29872	hsa-miR-340-5p	0.419901	1370	608	1318	552.5	4.43025	1.86027
146005	hsa-miR-3129-5p	0.459105	98.5	77.5	48	22	0.161345	0.0740741
146085	hsa-miR-3170	0.246792	123.5	72.5	69	17	0.231933	0.0572391
145677	hsa-miR-139-5p	0.359724	935.5	372.5	885.5	318	2.97647	1.07071
145643	hsa-miR-382-5p	0.257377	843	258.5	792	203.5	2.66218	0.685185
148434	hsa-miR-3692-3p	0.438437	207	123.5	156.5	68.5	0.52605	0.23064
168644	hsa-miR-4775	0.277061	100.5	68.5	47	13	0.157983	0.043771
169272	hsa-miR-4419b	0.243127	257	105.5	206	50	0.692437	0.16835
169247	hsa-miR-4477a	0.12521	244.5	80.5	192	24	0.645378	0.0808081
29529	hsa-miR-369-3p	0.126228	172	67.5	123	15.5	0.413445	0.0521886
33902	hsa-miR-128-3p	0.464032	274	157	224.5	104	0.754622	0.350168
32608	hsa-miR-761	0.375332	258.5	132.5	209.5	78.5	0.704202	0.26431
14272	hsa-miR-542-3p	0.424442	108.5	78	59	25	0.198319	0.0841751
147554	hsa-miR-4273	0.116267	106	58.5	56	6.5	0.188235	0.0218855
148289	hsa-miR-3675-5p	0.485871	417	232	368	178.5	1.23697	0.60101
42755	hcmv-miR-US33-3p	0.280882	441	162.5	390.5	109.5	1.31261	0.368687
168735	hsa-miR-5586-3p	0.480808	113	83.5	62.5	30	0.210084	0.10101
42633	hsa-miR-885-3p	0.30486	139	81	92	28	0.309244	0.0942761
45775	hsa-miR-1279	0.347807	84	66.5	36	12.5	0.121008	0.0420875
46929	hsa-miR-548n	0.0758851	80.5	55.5	33	2.5	0.110924	0.00841751
145852	hsa-miR-210-3p	0.443311	906	433	857.5	379.5	2.88235	1.27778
145634	hsa-miR-132-5p	0.375631	119.5	80.5	72	27	0.242017	0.0909091
168748	hsa-miR-320e	0.332715	189	100.5	141.5	47	0.47563	0.158249
168875	hsa-miR-5091	0.454252	90	73	43	19.5	0.144538	0.0656566
169218	hsa-miR-5189-5p	0.35473	368	166.5	320.5	113.5	1.07731	0.382155
169138	hsa-miR-4504	0.210109	147.5	76	102.5	21.5	0.344538	0.0723906
46869	hsa-miR-1258	0.40611	658	301.5	608	246.5	2.0437	0.829966
29328	hsa-miR-582-3p	0.311635	99	68.5	45	14	0.151261	0.047138
46625	hsa-miR-1303	0.493788	85.5	72.5	35.5	17.5	0.119328	0.0589226
46872	hsa-miR-1262	0.0982043	177.5	65.5	127.5	12.5	0.428571	0.0420875
21702	hsa-miR-219a-1-3p	0.15925	366.5	104.5	314.5	50	1.05714	0.16835
46640	hsa-miR-1257	0.157497	131	67.5	79.5	12.5	0.267227	0.0420875
42730	hsa-miR-423-3p	0.387479	712.5	311	660.5	255.5	2.22017	0.860269
147816	hsa-miR-3162-5p	0.366558	192.5	105.5	138	50.5	0.463866	0.170034
169056	hsa-miR-4669	0.465067	166	107.5	112	52	0.376471	0.175084
169022	hsa-miR-4797-5p	0.369497	224.5	119.5	173.5	64	0.583193	0.215488
169262	hsa-miR-5009-5p	0.288947	183.5	94	130	37.5	0.436975	0.126263
169363	hsa-miR-320c	0.316855	1287	445.5	1234.5	390.5	4.14958	1.31481
169082	hsa-miR-1275	0.479572	14979	7202.5	14929	7147.5	50.1815	24.0657
169020	hsa-miR-4506	0.255986	98	67	45	11.5	0.151261	0.0387205
46737	hsa-miR-1265	0.492992	209.5	131.5	159.5	78.5	0.536134	0.26431
17439	hcmv-miR-UL36-5p	0.19032	100.5	63.5	50	9.5	0.168067	0.0319865
29802	hsa-miR-144-3p	0.310631	416	166	366	113.5	1.23025	0.382155
146163	hsa-miR-224-3p	0.408011	502.5	237	450.5	183.5	1.51429	0.617845
145746	hsa-let-7i-3p	0.405443	176	104.5	126	51	0.423529	0.171717
147613	hsa-miR-3145-3p	0.366688	104	74	56	20.5	0.188235	0.0690236
147523	hsa-miR-4263	0.223552	167.5	80.5	116.5	26	0.391597	0.0875421
168772	hsa-miR-224-5p	0.0971783	117	60.5	67	6.5	0.22521	0.0218855
168793	hsa-miR-4483	0.419309	116	81.5	64.5	27	0.216807	0.0909091
169329	hsa-miR-370-3p	0.481684	142	97	91.5	44	0.307563	0.148148
17391	hsa-miR-635	0.411096	132.5	89	86.5	35.5	0.290756	0.119529
46623	hsa-miR-1273a	0.413065	95	73	48.5	20	0.163025	0.0673401
46258	hsa-miR-1184	0.0513684	106.5	56	58.5	3	0.196639	0.010101
145714	hsa-miR-28-3p	0.360821	140.5	86	93	33.5	0.312605	0.112795
147925	hsa-miR-3126-5p	0.356571	260.5	129	213.5	76	0.717647	0.255892
148559	hsa-miR-411-3p	0.282354	123	74.5	74.5	21	0.25042	0.0707071
168897	hsa-miR-5187-5p	0.297798	82.5	65	37	11	0.12437	0.037037
169379	hsa-miR-4694-3p	0.415206	143	93	96.5	40	0.32437	0.13468
17958	hsa-miR-576-3p	0.1052	160	67	109.5	11.5	0.368067	0.0387205
11093	hsa-miR-379-5p	0.410921	1527.5	661.5	1476	605.5	4.96134	2.03872
148499	hsa-miR-3910	0.333895	80.5	66.5	30	10	0.10084	0.03367
11023	hsa-miR-222-3p	0.0775297	858	117.5	807.5	62.5	2.71429	0.210438
168583	hsa-miR-539-3p	0.209307	86	62	33.5	7	0.112605	0.023569
168994	hsa-miR-3591-5p	0.278354	308.5	124.5	255.5	71	0.858824	0.239057
169389	hsa-miR-4717-3p	0.269684	118.5	74.5	65	17.5	0.218487	0.0589226
42834	hsa-miR-219a-2-3p	0.0617861	315.5	71.5	267.5	16.5	0.89916	0.0555556
17520	hcmv-miR-US5-2-3p	0.059802	85.5	56.5	33.5	2	0.112605	0.00673401
42525	hsa-miR-671-3p	0.479679	120	88	71	34	0.238655	0.114478
14328	hsa-miR-124-3p	0.116188	334.5	86.5	284.5	33	0.956303	0.111111
42617	hsa-miR-541-5p	0.486532	86.5	72	35	17	0.117647	0.0572391
169040	hsa-miR-4753-5p	0.352351	149	90.5	99.5	35	0.334454	0.117845
169189	hsa-miR-4795-5p	0.113217	311.5	83.5	261	29.5	0.877311	0.0993266
27544	hsa-miR-363-5p	0.0809159	223	67	179.5	14.5	0.603361	0.0488215
17942	hsa-miR-125a-3p	0.46145	88	73	44.5	20.5	0.14958	0.0690236
42873	hsa-miR-944	0.0939078	75.5	56	32	3	0.107563	0.010101
42476	hsa-miR-374b-3p	0.0903157	105.5	59	61	5.5	0.205042	0.0185185
148663	hsa-miR-557	0.259259	129.5	74.5	85	22	0.285714	0.0740741
168636	hsa-miR-122-5p	0.432826	1177.5	542.5	1134	490	3.81176	1.64983
168903	hsa-miR-4439	0.331202	105.5	74	62	20.5	0.208403	0.0690236
168941	hsa-miR-4501	0.200337	105	65.5	60	12	0.201681	0.040404
168930	hsa-miR-5582-5p	0.076215	135.5	60	92	7	0.309244	0.023569
168846	hsa-miR-1273f	0.493981	77.5	71	36.5	18	0.122689	0.0606061
19582	hsa-miR-106b-5p	0.353338	2437	898.5	2387	842	8.02353	2.83502
46918	hsa-miR-375	0.106688	134.5	64	84.5	9	0.284034	0.030303
29490	hsa-miR-7-5p	0.41532	12745.5	5320	12693.5	5263	42.6672	17.7205
147584	hsa-miR-548t-5p	0.185497	103	67	54	10	0.181513	0.03367
145670	hsa-miR-18b-5p	0.194659	171	79	123.5	24	0.415126	0.0808081
148057	hsa-miR-186-3p	0.249267	155.5	80.5	108.5	27	0.364706	0.0909091
168802	hsa-miR-4516	0.440544	254.5	146	203.5	89.5	0.684034	0.301347
168603	hsa-miR-4664-5p	0.250421	89	64	36	9	0.121008	0.030303
169137	hsa-miR-4524b-5p	0.123665	92	61.5	40.5	5	0.136134	0.016835
169140	hsa-miR-3150a-5p	0.405305	136.5	90	86.5	35	0.290756	0.117845
46335	hsa-miR-548m	0.412098	294.5	154.5	245.5	101	0.82521	0.340067
46634	hsa-miR-1281	0.446905	146.5	97	97.5	43.5	0.327731	0.146465
148418	hsa-miR-3607-5p	0.356875	173	98	123.5	44	0.415126	0.148148
168860	hsa-miR-4766-5p	0.286954	238.5	108	188.5	54	0.633613	0.181818
169161	hsa-miR-4489	0.0553926	159	60.5	108.5	6	0.364706	0.020202
42852	hsa-miR-760	0.106846	81	56.5	37.5	4	0.12605	0.013468
17567	kshv-miR-K12-1-5p	0.35367	263.5	130.5	219.5	77.5	0.737815	0.260943
14270	hsa-miR-493-3p	0.183642	73.5	58	30	5.5	0.10084	0.0185185
17841	hsa-miRPlus-C1100	0.302835	87.5	65	43	13	0.144538	0.043771
145956	hsa-miRPlus-A1083	0.433565	111	81.5	67	29	0.22521	0.0976431
169258	hsa-miR-5692c	0.080382	125.5	58.5	81	6.5	0.272269	0.0218855
169164	hsa-miR-4705	0.240404	82.5	61.5	37.5	9	0.12605	0.030303
13143	hsa-miR-301a-3p	0.29303	382.5	152.5	335	98	1.12605	0.329966
17546	hsa-miR-585-3p	0.350458	240	122.5	191.5	67	0.643697	0.225589
42660	hsa-miR-144-5p	0.284166	193	97.5	141	40	0.47395	0.13468
17482	hsa-miR-411-5p	0.332689	197	106	138.5	46	0.465546	0.154882
42957	hsa-miR-323a-3p	0.0428528	143	60.5	93.5	4	0.314286	0.013468
42592	hsa-miR-338-3p	0.293517	161.5	88	107.5	31.5	0.361345	0.106061
11111	hsa-miR-432-5p	0.293653	206	105	153.5	45	0.515966	0.151515
42800	hsa-miR-582-5p	0.346614	208	111.5	157.5	54.5	0.529412	0.183502
42827	hsa-miR-652-3p	0.219638	203.5	90.5	150.5	33	0.505882	0.111111
145995	hsa-miR-196b-3p	0.35523	209	112	156.5	55.5	0.52605	0.186869
147632	hsa-miR-4297	0.3593	97.5	72.5	46	16.5	0.154622	0.0555556
148288	hsa-miR-550b-3p	0.349794	112	77.5	63	22	0.211765	0.0740741
148059	hsa-miR-493-5p	0.28381	81	65.5	30	8.5	0.10084	0.0286195
168819	hsa-miR-200a-3p	0.257117	141.5	80.5	93.5	24	0.314286	0.0808081
168968	hsa-miR-147b	0.224444	167.5	82	120.5	27	0.405042	0.0909091
168960	hsa-miR-4436a	0.290811	75.5	63	31	9	0.104202	0.030303
169155	hsa-miR-4480	0.274928	935.5	297	889	244	2.98824	0.821549
29460	hsa-miR-553	0.0580686	83.5	56	34.5	2	0.115966	0.00673401
17824	hsa-miRPlus-A1025	0.198007	92	63	43	8.5	0.144538	0.0286195
145857	hsa-miR-154-5p	0.47718	175	115	127	60.5	0.426891	0.203704
147926	hsa-miR-4329	0.311946	658	244	608.5	189.5	2.04538	0.638047
148644	hsa-miR-551b-3p	0.39392	137.5	88.5	89	35	0.29916	0.117845
168965	hsa-miR-4765	0.208984	117.5	65.5	69.5	14.5	0.233613	0.0488215
168895	hsa-miR-548ag	0.104827	91	58	43	4.5	0.144538	0.0151515
